1 **TRIM25 and ZAP target the Ebola virus ribonucleoprotein complex to mediate interferon-**  
2 **induced restriction**

3

4 Rui Pedro Galão<sup>1,5,6</sup>, Harry Wilson<sup>1,5</sup>, Kristina L Schierhorn<sup>1</sup>, Franka Debeljak<sup>1</sup>, Bianca S Bodmer<sup>2</sup>,  
5 Daniel Goldhill<sup>3</sup>, Thomas Hoenen<sup>2</sup>, Sam J Wilson<sup>4</sup>, Chad M Swanson<sup>1</sup> and Stuart J D Neil<sup>1,6</sup>

6 <sup>1</sup>: Department of Infectious Diseases, School of Immunology and Microbial Sciences, King's College  
7 London, UK

8 <sup>2</sup>: Institute for Molecular Virology and Cell Biology, Friedrich-Loeffler-Institut, Greifswald, Germany

9 <sup>3</sup>: Section of Virology, Department of Medicine, Imperial College London, London, UK.

10 <sup>4</sup>: MRC Centre for Virus Research, University of Glasgow, UK

11 <sup>5</sup>: These authors contributed equally to this work

12 <sup>6</sup>: Corresponding authors: [stuart.neil@kcl.ac.uk](mailto:stuart.neil@kcl.ac.uk); [ruip.pedro.galao@kcl.ac.uk](mailto:ruip.pedro.galao@kcl.ac.uk)

13

14

15

16

17

18 Running title: TRIM25 and ZAP target the EBOV vRNP

19

20

21 **Highlights**

- 22       • TRIM25 and ZAP play a major role on type I IFN-mediated inhibition of EBOV trVLP  
23       replication
- 24       • TRIM25 interacts with the EBOV NP and is recruited to vRNPs in the cytoplasm after viral  
25       entry
- 26       • TRIM25 ubiquitinates NP and displaces it from the viral genome, facilitating ZAP interaction
- 27       • ZAP targets CpGs in the EBOV genome to inhibit EBOV trVLP replication

28

29

30

31 **Summary**

32 Ebola virus (EBOV) causes highly pathogenic disease in primates. Through screening a  
33 library of human interferon-stimulated genes (ISGs), we identified TRIM25 as a potent  
34 inhibitor of EBOV transcription-and-replication-competent virus-like particle (trVLP)  
35 propagation. TRIM25 overexpression inhibited the accumulation of viral genomic and  
36 messenger RNAs independently of the RNA sensor RIG-I or secondary proinflammatory  
37 gene expression. Deletion of TRIM25 strongly attenuated the sensitivity of trVLPs to  
38 inhibition by type-I interferon. The antiviral activity of TRIM25 required ZAP and the effect of  
39 type-I interferon was modulated by the CpG dinucleotide content of the viral genome. We  
40 find that TRIM25 interacts with the EBOV vRNP, resulting in its autoubiquitination and  
41 ubiquitination of the viral nucleoprotein (NP). TRIM25 is recruited to incoming vRNPs shortly  
42 after cell entry, and leads to dissociation of NP from the vRNA. We propose that TRIM25  
43 targets the EBOV vRNP, exposing CpG-rich viral RNA species to restriction by ZAP.

44

45

46 Keywords: Ebola virus, type I interferon, TRIM25, ZAP

47

## 48 **Introduction**

49           Type I interferons (IFN-I) are released as part of the innate immune response to viruses and  
50 induce the expression of an array of genes, many of which have direct antiviral activity (McNab et al.,  
51 2015; Schoggins et al., 2011). These proteins often target conserved structures or fundamental  
52 processes common to the replication of diverse viruses that cannot be avoided by simple point  
53 mutations in a given viral protein (Schneider et al., 2014). In turn, viruses encode mechanisms to  
54 inhibit either the detection of virally-expressed pathogen associated microbial patterns (PAMPs) by  
55 pattern recognition receptors (PRR), or the signalling through the IFN-I receptor complex (IFNAR1/2).  
56 These strategies are essential for efficient *in vivo* viral propagation and pathogenesis (Basler, 2015;  
57 Beachboard and Horner, 2016). However, viral evasion from innate immune responses is generally  
58 incomplete; acute viral infections are characterized by local and systemic IFN-I responses, and most  
59 viruses exhibit some degree of sensitivity to interferon treatment in their target cell types.  
60 Understanding the mechanisms by which IFN-I exerts its antiviral effects not only yields new  
61 understanding of how mammals have evolved to defend themselves against viral pathogens, but also  
62 reveals areas of vulnerability in virus replication that may be exploited therapeutically.

63           Ebola virus (EBOV, species *Zaire ebolavirus*) is the prototypic member of the ebolavirus  
64 genus of the *Filoviridae*, a family of filamentous enveloped non-segmented negative strand RNA  
65 viruses responsible for sporadic outbreaks in sub-Saharan Africa (Messaoudi et al., 2015). Ebola  
66 virus disease (EVD) is characterized by its high mortality rate (25%-90%), with symptoms including  
67 severe fever, vomiting, diarrhoea, that in some cases progress to haemorrhagic fever (Geisbert et al.,  
68 2003b). EBOV and other filoviruses are zoonotic infections in man, probably transmitted from bat  
69 species (Amman et al., 2014; Leroy et al., 2005), and are spread from person to person by close  
70 contact with bodily fluids (Vetter et al., 2016). Individuals that recover from EVD can harbour  
71 persistent virus, and men can shed infectious EBOV in the semen for many months after viremia  
72 becomes undetectable (Deen et al., 2017; Subissi et al., 2018; Thorson et al., 2021).

73           EBOV replicates in various tissues but is thought to primarily infect cells of the myeloid  
74 lineage (Geisbert et al., 2003a). After uptake by macropinocytosis, the virion membrane fuses with the  
75 host endosome following the interaction between a proteolytically processed form of its glycoprotein  
76 (GP) and the cellular receptor, NPC1 (Carette et al., 2011; Chandran et al., 2005; Cote et al., 2011).  
77 Fusion releases the viral genome into the cytoplasm, allowing the initiation of the replication cycle

78 (Muhlberger, 2007). The viral genomic RNA (vRNA) exists as a helical ribonucleoprotein complex  
79 (RNP) that contains the viral nucleoprotein (NP) and its cofactor VP35, as well as, at lower  
80 concentrations, the transcriptional regulator VP30, and the viral RNA-dependent RNA polymerase L  
81 (Noda et al., 2010). As with all negative-strand RNA viruses, the viral genome is first transcribed by L  
82 to generate mRNAs for viral gene products. L-mediated transcription initiates only at the 3' leader  
83 sequence of the vRNA. Viral genes are arrayed along the genome in an order correlating with their  
84 abundance in the infected cell; at the intergenic boundaries between each viral gene, L either  
85 dissociates from the genome, or reinitiates transcription, a process regulated by VP30 (Biedenkopf et  
86 al., 2016; Muhlberger, 2007). VP30 also acts as the molecular switch to promote the synthesis of a  
87 full length positive sense copy of the RNA genome (cRNA) (Kruse et al., 2018; Biedenkopf et al.,  
88 2013). The cRNA acts as template for the production of new copies of vRNA, that are then assembled  
89 into new vRNPs within cytoplasmic inclusion bodies, which are themselves induced by vRNP  
90 components (Hoenen et al., 2012). New vRNPs are then targeted to the plasma membrane (PM)  
91 where they interact with VP40, and bud from the surface as new virions (Martin-Serrano et al., 2001;  
92 Noda et al., 2002).

93 EBOV encodes two major activities that counteract the innate immune responses. First, VP35  
94 counteracts recognition of viral RNA species by the PRR retinoic acid induced gene I (RIG-I), as well  
95 as by playing an incompletely defined role in disabling proinflammatory signalling downstream of PRR  
96 activation (Basler et al., 2003; Cardenas et al., 2006; Chang et al., 2009; Luthra P et al., 2013; Prins  
97 et al., 2009). Second, VP24 inhibits signalling through IFNAR1/2 by blocking nucleocytoplasmic  
98 transport of phosphorylated STAT1 (Shabman et al., 2011; Zhang et al., 2012). Additionally, the virus  
99 may antagonize certain antiviral proteins directly; notably the activity of tetherin/BST2 is counteracted  
100 by EBOV GP in some experimental systems (Kaletsky et al., 2009; Lopez et al., 2010). However,  
101 EBOV replication can still be inhibited by pre-treatment of target cells with IFN-I, and a number of  
102 ISGs have been proposed to have antiviral activities against EBOV (Huang et al., 2011; Kuroda et al.,  
103 2020; Okumura et al., 2008).

104 The requirement for high containment laboratories makes identifying host factors that  
105 facilitate or inhibit the replication of filoviruses challenging. To identify novel EBOV antiviral proteins,  
106 we used a well-established EBOV transcription- and replication-competent virus-like particle (trVLP)  
107 system to screen a human ISG library (Kane et al., 2016; Watt et al., 2014). Amongst these, we

108 identified tripartite-motif family member 25 (TRIM25) as a potent antiviral inhibitor of EBOV trVLP  
109 replication. TRIM25, an E3 ubiquitin ligase, until recently widely accepted as being a positive regulator  
110 of RIG-I-mediated pattern recognition of cytoplasmic viral RNA, has other emerging roles in innate  
111 immunity (Gack et al., 2007; Li et al., 2017; Martin-Vicente et al., 2017). Of note, a recent study has  
112 implicated nuclear forms of TRIM25 as having direct antiviral activity against the influenza A virus  
113 vRNP (Meyerson et al., 2017). Furthermore, TRIM25 is an important cofactor of the zinc-finger  
114 antiviral protein (ZAP, also known as ZC3HAV1 or PARP13), which broadly targets many RNA  
115 viruses (Li et al., 2017; Zheng et al., 2017). Recent evidence has shown that ZAP binds to RNAs with  
116 a high content of CpG dinucleotides (Chiu et al., 2018; Takata et al., 2017), targeting them for  
117 degradation. How TRIM25 regulates ZAP is unknown. Although TRIM25 interacts with and  
118 ubiquitinates ZAP, these events are not required for ZAP activity (Li et al., 2017; Zheng et al., 2017).  
119 Here we show that TRIM25 interacts with the EBOV vRNP and induces the dissociation of NP from  
120 the genomic RNA, thereby promoting CpG-dependent restriction by ZAP.

121

## 122 **Results**

123 **EBOV trVLP replication is sensitive to type I interferon.** The EBOV trVLP system is a reverse  
124 genetics system that models the entire replication cycle of the virus without the need for high  
125 containment laboratory facilities (Figure S1A)(Watt et al., 2014). trVLP stocks are produced in  
126 HEK293T cells (called passage 0 (p0) cells), which are then used to infect HEK293T or U87-MG  
127 target cells expressing the viral entry factor TIM-1 (passage 1 (p1) cells). Propagation of trVLPs  
128 requires co-transfection of plasmids encoding the vRNP components NP, VP35, VP30 and L prior to  
129 infection. trVLP replication can be measured by Renilla luciferase (Rluc) activity in lysates of target  
130 cells p1, and by assessing infectivity of harvested p1 supernatants on new target TIM-1 expressing  
131 HEK293T cells (passage 2 (p2) cells). p1 cells can also be used to assess the effects of exogenous  
132 treatments, and over-expression or knockdown/knockout of candidate cellular factors.

133 In order to identify candidate ISGs that inhibit EBOV replication, we first tested the sensitivity  
134 of trVLPs to IFN-I. HEK293T and U87-MG cells stably expressing TIM-1 were pre-treated overnight  
135 with various doses of universal type-I IFN- $\alpha$  and then infected with equal doses of EBOV trVLPs. Rluc  
136 activity was measured in p1 cells 24h after infection, and trVLP yield was assessed in the  
137 supernatants by infecting HEK293T-TIM1 p2 cells. IFN-I treatment of both cell types gave a robust

138 dose-dependent inhibition of Rluc activity in p1 and p2, although trVLP replication was more sensitive  
139 to IFN-I in U87-MG cells (Figure 1A). Given the distinct impact of IFN- $\alpha$  and IFN- $\beta$  on filoviruses  
140 pathogenesis in animal models and humans (Escudero-Perez et al., 2019), we tested their  
141 independent effect on EBOV trVLPs. As observed with the universal type-I IFN- $\alpha$ , both IFN- $\alpha$ 2a and  
142 IFN- $\beta$ 1a produced a dose-dependent inhibition of EBOV trVLPs on U87-MG cells, with IFN- $\beta$ 1a being  
143 slightly more antiviral (Figure S1B), reproducing a previously reported observation (McCarthy et al.,  
144 2016). Using an EBOV VP40-Blam VLP-based entry assay, IFN-I pre-treatment of target cells  
145 resulted in a minor reduction in entry of particles pseudotyped with EBOV-GP, indicating the majority  
146 of the inhibition of trVLP replication was taking place post viral entry (Figure 1B). In keeping with this,  
147 IFN-I treatment resulted in a dose-dependent reduction of vRNA and mRNA species in the infected  
148 cells (Figure 1C), as well as concomitant reduction of new viral minigenomes in the supernatant that  
149 mirrored the effects on Rluc activity (Figure 1D). Importantly, IFN-I treatment did not affect the levels  
150 of the vRNP proteins expressed *in trans* (Figure S1C). Thus, human cells exposed to type I IFN  
151 exhibit a robust inhibition of filoviral replication through the induction of one or more ISGs targeting  
152 trVLP gene expression and minigenome replication.

### 153 **A human arrayed ISG screen identifies TRIM25 as a potent inhibitor of EBOV trVLP replication**

154 We then screened an expression library of 407 human ISGs individually cloned into mammalian  
155 expression vectors, and measured the impact of each ISG on EBOV trVLP replication (Kane et al.,  
156 2016). Briefly, individual expression vectors encoding a human ISG were transfected into HEK293T-  
157 TIM1 p1 cells alongside the vRNP components and a firefly luciferase (Fluc) transfection control. 24h  
158 later the cells were infected with a fixed dose of trVLPs. Rluc activity was measured at the harvest of  
159 supernatants 24h later. Supernatant infectivity was then assessed on p2 cells as before. Negative  
160 (GFP, empty vector) and positive (IRF1, BST2/tetherin) controls were included on each 96-well plate  
161 and Rluc activity in both p1 and p2 cells was normalized to the activity of control Fluc within individual  
162 wells and the effects of each individual gene was expressed as a percentage of the plate average  
163 (Figure 1E, Table S1). Both p1 and p2 outputs of the screen were normally distributed (Figure S1D),  
164 however we reasoned that outlier ISGs that directly inhibited EBOV replication should always display  
165 a phenotype in p2 as well as potentially in p1, reflecting likely effects on early and/or late viral  
166 replication stages. We focussed on ISGs that gave at least a 5-fold reduction of trVLP infectivity in p2,  
167 and discarded any hit in p1 that did not carry over. The top 50 hits were validated in three

168 independent experiments and ranked (Figure 1F). We then selected 20 of the top p2 hits from the  
169 validation for further characterization. First, we examined their effects on trVLP RNA using a primers-  
170 probe set in the *VP40* gene (that detects vRNA, cRNA and VP40 mRNA) and another set in the trVLP  
171 5'-trailer region (that detects vRNA and cRNA) in p1 cell lysates, as well as measuring viral RNA  
172 levels in the supernatants as an indicator of released trVLP virions (Figure 1G). The majority of these  
173 ISGs, with the exception of TNK2, CTCFL, HERC5 and OAS2 affected the levels of cell-associated  
174 viral RNA. In addition to these, a few other ISGs had no significant impact on the viral RNA levels in  
175 the supernatants (ARHGEF3, SLFN12, P2RY6 and PABPC4). Several (FFAR2, UNC93B1, APOL6,  
176 SLC15A3, IFIH1 (MDA5), BST2, SLFN12 and PIM3) also reduced the expression of one or more of  
177 the viral RNP components expressed *in trans* (Figure S1E), potentially a confounding factor.  
178 Moreover, we noticed significant toxicity effects of FFAR2, C5ORF39, APOL6 and UNC93B1  
179 consistent with previous reports of their proapoptotic activities (Figure S1F). Lastly, it is well known  
180 that many ISGs, and particularly pattern recognition receptors, can activate proinflammatory signalling  
181 pathways, indicating that antiviral activities measured could be mediated secondarily through  
182 upregulation of other ISGs or interferons. We therefore screened the selected 20 hits for their abilities  
183 to activate Fluc reporter genes driven by NFkB, IRF3 (ISG56/IFIT1) or IFN-induced ISGF3 (ISRE)  
184 dependent promoters (Figure S1G). As expected, expression of both IFIH1 (MDA5) and IRF1  
185 activated ISG56 and ISRE promoters, indicating both an IRF3 and a secondary IFN-I-dependent  
186 response. IFIH1 (MDA5), FFAR2, P2YR6 and BST2 also triggered NFkB-dependent responses at  
187 both 24h and 48h. In contrast, TRIM25 only gave a detectable NFkB-dependent signal at 48h (i.e. 24h  
188 after p1 viral harvest). Importantly, TRIM25 overexpression robustly inhibited the accumulation of  
189 trVLP RNA species in p1 cells without affecting expression of vRNP components or demonstrating  
190 overt toxicity (Figures 1F, S1E and S1F). Moreover, recent evidence suggests that TRIM25 inhibits  
191 influenza virus independent of RIG-I (Meyerson et al., 2017). Thus, TRIM25 was one of the candidate  
192 EBOV antiviral factors taken forward for further analysis.

193 **TRIM25 plays a major role in IFN-I-mediated inhibition of EBOV trVLP replication and reduces**  
194 **the abundance of viral RNA species.** To further characterize the antiviral activity of TRIM25 we first  
195 showed that its ectopic expression in HEK293T-based p1 cells significantly blocked trVLP RLuc  
196 activity, both in these cells and subsequent carry over to p2 at increasing trVLP inputs (Figure 2A),  
197 without affecting entry of EBOV-GP pseudotyped lentiviral vectors (Figure 2B). The block to trVLP



198 replication correlated with reduced intracellular levels of viral mRNA, cRNA and vRNA, as well as  
199 vRNA levels in the supernatant (Figure 2C). We then used lentiviral-based CRISPR/Cas9 vectors to  
200 knockout TRIM25 in U87-MG and HEK293T cells (Figure 2D). In both cell types, TRIM25 is  
201 expressed at readily detectable levels and this expression is further augmented upon IFN-I treatment.  
202 Significantly, whereas IFN-I pre-treatment of control U87-MG cells carrying an irrelevant sgRNA  
203 targeting *E.coli LacZ* gene resulted in a 20-30 fold inhibition of trVLP infectivity in p1 target cells,  
204 knockout of TRIM25 significantly attenuated this block to trVLP production (Figure 2E), correlating  
205 with a rescue of viral RNA species in the corresponding cell lysates and supernatants (Figure 2F).  
206 Similarly, the antiviral effects of IFN- $\alpha$ 2a or IFN- $\beta$ 1a on EBOV trVLPs were also attenuated on U87-  
207 MG TRIM25 knockout cells (Figure 2G). Importantly, this effect of TRIM25 knockout was specific to  
208 the EBOV trVLPs, as IFN-I reduced the infectivity of VSV-G-pseudotyped HIV-1-based vectors  
209 equally in control sgRNA (*LacZ*) and knockout U87-MG cell lines (Figure 2H). Furthermore, in the  
210 absence of IFN treatment, TRIM25 knockout HEK293T cells gave significantly higher Rluc activity in  
211 p0 producer cells and yielded significant higher levels of virus (p1 infectivity) (Figure 2I). Thus,  
212 TRIM25 restricts trVLP production, and is an important component for the IFN-induced antiviral  
213 restriction of EBOV.

214 **TRIM25-mediated restriction of EBOV requires components of the cytoplasmic RNA pattern**  
215 **recognition machinery, but not proinflammatory signal transduction.** The best characterized role  
216 of TRIM25 is as a cofactor of the cytoplasmic RNA sensor RIG-I (Gack et al., 2007). TRIM25 and/or  
217 Riplet mediate Lys63-linked polyubiquitination of RIG-I and promote the binding of this PRR to viral  
218 RNAs and its interaction with the full-length (FL) mitochondrial antiviral protein (MAVS) isoform. This  
219 is essential for the propagation of proinflammatory signalling downstream of RIG-I and its related  
220 helicases (Loo and Gale, 2011). We therefore used CRISPR/Cas9 to delete both RIG-I and MAVS in  
221 HEK293T and U87-MG cells (Figure 3A and B). Whilst RIG-I expression is only detectable after IFN-  
222 treatment of the control sgRNA cells (*LacZ*), FL-MAVS and a shorter isoform known as miniMAVS  
223 (Brubaker et al., 2014) are readily detected in both cell lines at steady state. Both isoforms are  
224 expressed as alternative translation products from the same mRNA. miniMAVS localizes and interacts  
225 with FL-MAVS, but having no CARD domains, cannot interact with RIG-like helicases and activate  
226 antiviral signal. Moreover, its interference with FL-MAVS activity has suggested it as a negative  
227 regulator of RNA sensing (Brubaker et al., 2014). We designed sgRNA guides that would target exons

228 upstream or downstream of the miniMAVS start codon and thus generated FL-MAVS knockout, or FL-  
229 MAVS and miniMAVS double-knockout cells (DKO). We then examined the effects of these  
230 knockouts on the antiviral activity of ectopically expressed TRIM25. Whilst TRIM25 retained antiviral  
231 activity when overexpressed in RIG-I knockout cells it lost this activity in FL-MAVS/miniMAVS double-  
232 knockout cells (Figure 3C). Furthermore, there was no effect of RIG-I knock-out on the sensitivity of  
233 trVLPs to IFN-I in U87-MG cells (Figure 3D). By contrast, trVLP replication was significantly rescued  
234 from IFN-I antiviral effect in FL-MAVS/miniMAVS DKO cells, with FL-MAVS alone KO presenting only  
235 a partial rescue (Figure 3E). To clarify the potential requirement of each MAVS isoform for the  
236 antiviral activity of ectopically expressed TRIM25, we performed rescue experiments in which the  
237 expression of miniMAVS and/or FL-MAVS was stably reconstituted in HEK293T MAVS DKO cells  
238 (Figure 3F). The antiviral effect of TRIM25 against EBOV trVLP was rescued by the simultaneous  
239 reintroduction of CRISPR-resistant forms of miniMAVS and FL-MAVS (MAVS<sup>CR</sup>), whilst still  
240 significantly attenuated when FL-MAVS (M142A<sup>CR</sup>) or miniMAVS (M1A<sup>CR</sup>) were expressed separately  
241 (Figure 3G). Thus, the TRIM25 and IFN-I antiviral activities against EBOV trVLPs required both  
242 signalling active and inactive MAVS isoforms, but not RIG-I, suggesting a mechanism distinct from  
243 classical RLR signalling. To further rule out classical RNA sensing as the mechanism, we knocked out  
244 TBK1, which is the essential kinase downstream of MAVS for IFN and ISG induction (Figure 3H). As  
245 with RIG-I knockout, depletion of TBK1 did not affect TRIM25- or IFN-I-mediated inhibition of trVLP  
246 replication (Figures 3I and 3J). Moreover, TRIM25 overexpression in all knockout cell lines induced  
247 indistinguishable NFκB-dependent reporter activity at 48h irrespective of its antiviral effect, arguing  
248 against an indirect role of TRIM25-mediated signalling (Figure 3K). Taken together, these data  
249 indicate that the TRIM25/IFN-I-dependent antiviral restriction of EBOV trVLP replication requires both  
250 MAVS isoforms, but is independent of the proinflammatory signal generated by classical cytoplasmic  
251 RLR sensing.

252 **Potent IFN-mediated inhibition of EBOV trVLP propagation requires ZAP and is modulated by**  
253 **CpG content of the viral genome.** TRIM25 has been implicated in the regulation of ZAP, which has  
254 antiviral activity against numerous mammalian RNA viruses (Bick et al., 2003; Gao et al., 2002; Li et  
255 al., 2017; Zheng et al., 2017). ZAP is expressed as long (L) and short (S) splice variants, the latter  
256 lacking the catalytically inactive PARP-like domain (Kerns et al., 2008). ZAP-L has more potent  
257 antiviral activities against some viruses and has a stronger interaction with TRIM25 than ZAP-S

258 (Charron et al., 2013; Goodier et al., 2015; Kerns et al., 2008; Li et al., 2017). Whilst ZAP-S is the  
259 major IFN-regulated isoform (Goodier et al., 2015; Hayakawa et al., 2011) and was included in our  
260 ISG screen, it did not score as a hit. By contrast, however, overexpression of ZAP-L had a potent  
261 antiviral activity against EBOV trVLP replication in HEK293T-TIM1 p1 and p2 cells, which manifested  
262 as significant reductions in viral mRNA, vRNA and cRNA species (Figures 4A and S2A). We then  
263 generated HEK293T and U87-MG ZAP CRISPR knockout cells (Figure 4B), and found that like  
264 TRIM25 knockout cells, they exhibited a significantly reduced restriction of trVLP replication and viral  
265 RNA accumulation after pre-treatment with IFN-I (Figures 4C and 4D). We also observed an  
266 attenuated effect of IFN- $\alpha$ 2a and IFN- $\beta$ 1b on trVLP propagation (Figure S2B) and increased viral  
267 yields from p0 cells (Figure S2C). Furthermore, ZAP and TRIM25 interdependence was confirmed by  
268 showing that the antiviral effect conferred by their individual overexpression was abolished in cells  
269 lacking the other gene (Figure 4E). In contrast, while we could confirm the report (Meyerson et al.,  
270 2017) that overexpression of TRIM25 targets the influenza vRNP, the magnitude of this activity was  
271 unaffected by ZAP knockout (Figure S2D).

272 ZAP has previously been shown to inhibit the expression of EBOV proteins (Muller et al.,  
273 2007), particularly the RdRp L which we supply here *in trans*. However, whilst we could demonstrate  
274 significant reductions in L mRNA and protein levels in p1 cells transfected with ZAP-L (Figure 4F and  
275 S2E), the same reductions were observed in TRIM25 KO cells where ZAP overexpression had limited  
276 impact in reducing the levels of EBOV genomic RNA or antiviral activity (Figure S2F and 4E).  
277 Moreover, our earlier observations that IFN-I treatment did not affect the expression levels of vRNP  
278 components (Figure S1C) further argued against the reduction in L expression as the major  
279 contributor to the TRIM25/ZAP-mediated restriction of EBOV trVLPs under these experimental  
280 conditions.

281 Most mammalian viral RNA genomes exhibit marked suppression of CpG dinucleotides (Fros  
282 et al., 2017; Takata et al., 2017). In the case of HIV-1, artificial increase in CpG concentration in the  
283 viral genome impairs replication through ZAP-mediated inhibition, with evidence that ZAP binds  
284 directly to the CpGs themselves and induces RNA degradation or translational repression (Takata et  
285 al., 2017). The EBOV genome contains just over half of the number of CpGs expected by chance for  
286 its nucleotide composition (Figure S2G). These CpGs are widely distributed across the genome, both  
287 in the protein coding genes and intergenic regions with the notable exception of the intergenic region

288 between GP and VP30 (Figure S2H). The trVLP CpG content is moderately higher, with 61 CpGs in  
289 the *Rluc* reporter gene that replaces NP as first ORF. Since the *RLuc* coding sequence does not  
290 contain any necessary viral *cis*-acting regulatory elements, this gave us the opportunity to test  
291 whether CpG content could impact upon IFN-sensitivity of the virus. We generated a trVLP in genome  
292 in which all the CpGs in *Rluc* were silently mutated, reducing the observed vs expected CpG content  
293 of the trVLP to 0.45 (CpG low, Figures S2G and S2H). This modification had no detectable effect on  
294 trVLP yield or replication (Figure 4G). However, the CpG-low containing trVLP exhibited partial rescue  
295 from ZAP-L restriction (Figure 4G), which correlated with increased intracellular levels of viral mRNA,  
296 cRNA and vRNA on these cells, as well as vRNA levels in the supernatant (Figure 4H). Furthermore,  
297 the CpG-low containing trVLP was also less sensitive than the parental trVLP to IFN-I (Figure 4I).  
298 Since Renilla expression is not required for trVLP replication and both of these phenotypes were  
299 measured in p2 cells, these data imply that a major target of ZAP-mediated restriction is the CpG  
300 dinucleotides in the trVLP. These data further suggest that CpG content of the genomes of RNA virus  
301 can sensitize them to type I IFNs in a ZAP-dependent manner. Finally, ZAP-mediated targeting of  
302 CpG-containing retroviral RNA for degradation was shown to depend not only on TRIM25, but also on  
303 the cytoplasmic protein KHNYN, which predictably confers the nuclease activity that is lacking in both  
304 ZAP isoforms (Ficarelli et al., 2019). However, in contrast to ZAP-mediated restriction of retroviruses,  
305 this does not seem to be dependent on KHNYN, as depletion of this protein in U87-MG cells did not  
306 attenuate the antiviral effect of IFN-I on EBOV trVLPs replication (Figure S4I and S4J).

### 307 **TRIM25 interacts with the EBOV vRNP and promotes ubiquitination of NP.**

308 While the role of TRIM25 as a ZAP cofactor is established, how it facilitates ZAP targeting of viral  
309 RNAs is not understood. However, given the previously reported interaction between TRIM25 and  
310 influenza virus (Meyerson et al., 2017), we hypothesized that it could act directly on EBOV vRNP  
311 components to promote ZAP-mediated restriction. We noted that overexpression of TRIM25 induced  
312 a smear of higher molecular weight species above NP in western blots of transfected HEK293T cell  
313 lysates during the screen (Figure S1E), so we therefore first examined whether TRIM25 could interact  
314 with the EBOV NP and its cofactor VP35. NP co-immunoprecipitated with TRIM25, whereas VP35  
315 only pulled-down with TRIM25 in the presence of NP (Figure 5A). Furthermore, reciprocal  
316 immunoprecipitation of NP from p1 cells brought down both VP35 and TRIM25, indicating that  
317 TRIM25 could interact with the vRNP in an NP-dependent manner (Figure S3A). This interaction was

318 resistant to RNase treatment, suggesting that the vRNA was not bridging the interaction between  
319 TRIM25 and NP (Figure S3B). Endogenous ZAP-L, but not ZAP-S, could also be detected in  
320 TRIM25/NP coprecipitates. However, in cells lacking ZAP, TRIM25 could still interact with NP (Figure  
321 S3C). To determine if TRIM25 localized to viral replication compartments, we analysed endogenous  
322 TRIM25 expression by immunofluorescence. TRIM25 re-localized to NP-containing viral inclusion  
323 bodies in cells transfected with the vRNP proteins (Figure 5B). NP expression was sufficient for this  
324 re-localization, but it was markedly enhanced in the presence of VP35 which is known to regulate the  
325 conformational dynamics of NP in the vRNP (Kirchdoerfer et al., 2015).

326 Like many TRIM family members, TRIM25 consists of a N-terminal RING domain containing  
327 E3-ubiquitin ligase activity, two B-Box domains, a coiled-coil domain that allows it to form antiparallel  
328 dimers, and a C-terminal PRYSPRY substrate recognition domain (D'Cruz et al., 2013; Gack et al.,  
329 2007; Sanchez et al., 2014) (Figure 5C). Using deletion mutants of TRIM25, we found that the  
330 mutants lacking the PRYSPRY domain, but not the RING domain, lost their ability to interact with NP  
331 in co-immunoprecipitations (Figure 5C). However, both PRYSPRY and RING domains were essential  
332 for antiviral activity against EBOV trVLPs when overexpressed in HEK293T-TIM1 p1 cells (Figure  
333 5D). When activated by their cognate ligands, many TRIM proteins undergo autoubiquitination as well  
334 as inducing ubiquitination of target proteins (Tomar and Singh, 2015). Consistent with this, in the  
335 presence of HA-tagged ubiquitin, co-expression of TRIM25 and NP induced the appearance of higher  
336 molecular weight species of both proteins, that could be precipitated with anti-HA and NP antibodies,  
337 indicating the presence of ubiquitin molecules (Figure 5E). Ubiquitinated species of NP and TRIM25  
338 could not be detected in cells transfected with the RING-deleted TRIM25 mutant, indicating the RING  
339 E3 ligase activity was essential (Figure S3D). However, in HEK293T cells lacking either ZAP or FL-  
340 MAVS and miniMAVS where TRIM25 antiviral activity is curtailed, TRIM25 and NP co-expression  
341 could still lead to ubiquitination of both proteins (Figures S3E and S3F). To exclude the possibility that  
342 our observations are product of an artefact associated with overexpressing HA-tagged ubiquitin, we  
343 pulled-down EBOV NP following its co-expression with YFP or TRIM25 under endogenous levels of  
344 ubiquitin, and treated this fraction with Ubiquitin Specific Peptidase 2 (USP2). The typical smear of  
345 higher molecular weight observed above NP when TRIM25 is ectopically expressed disappeared  
346 upon treatment with USP2, reinforcing our initial finding that TRIM25 promotes the ubiquitination of  
347 NP (Figure 5F). Of note, we did not detect evidence of a differential NP degradation in the absence of

348 TRIM25 (Figure S3G). Thus, the ubiquitin ligase activity of TRIM25, and specifically the ubiquitination  
349 of NP and auto-ubiquitination of TRIM25, are necessary but not sufficient to explain its antiviral  
350 activity against EBOV.

351         Recent evidence has suggested that activation of TRIM25 E3 ligase activity requires its  
352 binding to RNA, with two distinct RNA interaction domains being described – a basic patch with 7  
353 lysine residues in the linker between the coiled-coil and the PRYSPRY domain, and an RNA-binding  
354 domain (RBD) in the N-terminal region of the PRYSPRY itself. Activation is also strictly dependent on  
355 the multimerization of TRIM25 dimers through dimerization of N-terminal RING domains (Sanchez et  
356 al., 2018). In order to further probe the determinants of TRIM25-mediated antiviral activity, we made a  
357 series of mutations in these functional domains (Figure 6A). Compared to the wildtype protein, some  
358 of the targeted mutations in the RING dimerization interface, the catalytic site itself, or the PRYSPRY  
359 domain significantly impaired antiviral activity (Figure 6A). Of these RING dimerization mutants N66A,  
360 L69A and V72A lost all antiviral activity (Figure 6A). Similarly, deletion of the RBD or mutation of the  
361 linker region basic patch (7KA) led to lost activity. Targeted mutations predicted to disrupt the coiled-  
362 coil (Sanchez et al., 2014) were not significantly defective in restricting trVLP replication. Western blot  
363 analyses indicated that antiviral potency appeared to correlate well with NP ubiquitination under  
364 endogenous levels of ubiquitin (Figure 6B). While most RING dimerization mutants blocked  
365 ubiquitination of NP, individual mutations in the catalytic site reduced, but did not completely, abolish  
366 it. Furthermore, the effectively antiviral coiled-coil mutants Y254A and Y252A, together with the  
367 BBox2 RHK mutant, were still capable to induce NP ubiquitination. Interestingly the putative RNA-  
368 binding activity mutants, particularly the RBD, were also impaired in NP ubiquitination. Unlike the full  
369 deletion of the PRYSPRY domain, all functional RING mutants of TRIM25 tested retained the ability to  
370 interact with NP in coimmunoprecipitations as did the RBD deletion (Figure 6C). Surprisingly, the 7K  
371 mutant lost NP interaction, suggesting that it may affect PRYSPRY-mediated NP interaction.

372 **TRIM25 is recruited to incoming vRNPs and reduces NP association with trVLP vRNA and**  
373 **promotes its interaction with ZAP.**

374 The data presented above support the hypothesis that TRIM25 and ZAP target the EBOV vRNP to  
375 block its transcription and/or replication. To examine this in detail we first tested whether incoming  
376 vRNPs alone were capable of re-localizing endogenous TRIM25. HEK293T LacZ CRISPR-TIM1 cells  
377 were infected with concentrated trVLP supernatants in the absence of transfection of vRNP

378 components, then fixed and stained for NP and TRIM25 3 to 6 hours post-infection. In approximately  
379 5% of cells, distinct NP positive foci were detected in the cytoplasm, associated with an aggregation  
380 of endogenous TRIM25 (Figure 7A, left panel). To ensure this re-localisation was specific for cells in  
381 which trVLPs had entered, we made use of HEK293T-TIM1 cells in which the endosomal EBOV  
382 fusion receptor NPC1 had been deleted by CRISPR, thus rendering them uninfected by VLPs  
383 pseudotyped with EBOV GP (Figure S4A-S4C). By contrast, in these cells we saw no evidence of  
384 cytoplasmic NP structures or TRIM25 re-localization (Figure 7A, right panel), suggesting that TRIM25  
385 can only associate with incoming EBOV vRNPs after fusion of the viral membrane and release of the  
386 vRNPs into the cytoplasm.

387 We then asked whether TRIM25 or ZAP could affect the integrity of the vRNP. As a control  
388 we could show that neither overexpression of TRIM25, nor ZAP, affected total cell-associated trVLP  
389 genomes 3 hours post-infection (Figure S4D). mRNA abundance is very low at this timepoint,  
390 showing that any primary transcription is below the limit of detection. Thus, under conditions in which  
391 no vRNP components were ectopically expressed, we performed RNA-IPs of NP-associated genomic  
392 trVLP vRNA after UV-crosslinking of cells overexpressing GFP, TRIM25 or ZAP. Immunoprecipitation  
393 of NP under these conditions consistently brought down 5-to-10% of the input genomes. Interestingly,  
394 overexpression of TRIM25 or ZAP significantly reduced the levels of trVLP genome associated with  
395 incoming NP (Figure 7B), independently of using WT or CpG low EBOV trVLPs (Figure S4E).  
396 Importantly, TRIM25 and ZAP did not dissociate EBOV trVLP RNA from NP in NPC1 CRISPR  
397 knockout cells where cell associated virions will remain unfused in endosomal compartments (Figure  
398 7B). Furthermore, whilst TRIM25 overexpression in ZAP KO cells could still reduce NP/genome  
399 association, ZAP overexpression could not mediate the same effect in TRIM25 KO cells (Figure 7C),  
400 indicating that TRIM25, not ZAP, was essential for this effect, while the CpG content of the viral  
401 genome does not influence the targeting of the RNP by TRIM25 (Figure S4F). Furthermore, neither  
402 RING nor PRYSPRY-deletion mutants of TRIM25 could promote NP/genome dissociation (Figure  
403 7D), neither could the RNA-binding or RING mutants (Figure 7E), consistent with their lack of antiviral  
404 activity.

405 Since transcription of viral genes by the vRNP-associated RdRp is the one of the first events  
406 in EBOV replication after cellular entry, we performed the experiment in Figure 7B in the presence of  
407 250 $\mu$ M of the L inhibitor T705, which is sufficient to inhibit trVLP RLuc expression by 90% (Figure

408 S4G and S4H). Importantly, we found that T705 did not prevent TRIM25 overexpression from  
409 dissociating NP from the genome of incoming viruses (Figure 7F). Together these data indicate vRNP  
410 interaction, RNA-binding and activation of E3 ligase activity are required for TRIM25 to dissociate NP  
411 from the viral genome of incoming EBOV vRNPs, and thus facilitate interaction with ZAP.

412 We then performed a similar crosslinking-IP in cells, this time precipitating overexpressed  
413 ZAP. This markedly enriched for the trVLP viral genome at the same timepoint that NP/genome  
414 association was reduced (Figure 7G). However, immunoprecipitation from TRIM25 KO cells under the  
415 same experimental conditions showed no evidence of ZAP association with the trVLP genome,  
416 indicating that this correlated with TRIM25-mediated NP/genome dissociation. To further address the  
417 importance of the CpG content for ZAP association, we used a monocistronic genome containing the  
418 *Rluc* gene flanked by the leader and trailer regions of EBOV, from which we generated a low CpG  
419 variant in which all the CpGs in *Rluc* were silently mutated (Figure S4I). As expected, ZAP  
420 overexpression impacts in the replication of the WT monocistronic genome, whilst its effect is  
421 attenuated upon reduction of the CpG content (Figure S4J). This correlated with the significant  
422 impairment of ZAP association with the CpG low monocistronic genome when compared with the  
423 wild-type (Figure S4K), thus highlighting the important role of the viral genome CpG content for ZAP-  
424 mediated antiviral effect.

425 Finally, we asked if the NP/genome dissociation could be recapitulated following an IFN-I  
426 treatment. HEK293T LacZ-TIM1 cells, or those lacking TRIM25 or ZAP were treated overnight with  
427 IFN-I and then infected for 3h with trVLPs and similarly subjected to UV-crosslinked RNA-IP of NP. In  
428 HEK293T LacZ-TIM1 cells, IFN-I pre-treatment reduced the NP/genome association to a similar  
429 extent to the ectopic overexpression of TRIM25, without affecting total cell-associated trVLP vRNA.  
430 However, in TRIM25 knockout cells, there was no significant reduction in NP/genome association. In  
431 ZAP knockout cells, whilst NP/genome interactions were largely restored, there remained a small  
432 reduction in trVLP vRNA recovered after NP immunoprecipitation (Figure 7H). Thus, the TRIM25  
433 dependent dissociation of NP from the trVLP genome can be demonstrated in cells after IFN-I  
434 stimulation, implying the relevance of these observations to the antiviral mechanism.

435 In order to further investigate whether we could observe the antiviral effect of TRIM25 and  
436 ZAP in an alternative model of the trVLP system based only in infection, we created an EBOV  
437 minigenome that expressed a nanoluciferase in place of the Renilla, resulting in a more sensitive



438 reporter capable of reliably detecting at low enough quantities to observe primary transcription. The  
439 observed primary transcription could be quantified specifically as luciferase signal was not observed  
440 with either  $\Delta$ GP trVLPs or in NPC1 CRISPR knockout cells (Figure S4L). We then investigated the  
441 effect of TRIM25 and ZAP and observed that the antiviral activity of IFN-I treatment on primary  
442 transcription was attenuated in either TRIM25 or ZAP knockout cells at lower concentrations (Figure  
443 7I). Furthermore, we also observed that TRIM25 overexpression was also antiviral in this system  
444 (Figure S4M). These observations indicate that both TRIM25 and ZAP are important for the cellular  
445 defence against EBOV in an infection only based model.

446

## 447 **Discussion**

448 Through screening of a human ISG library we provide evidence that TRIM25 and ZAP are major  
449 effectors of interferon-induced antiviral restriction of EBOV trVLP. The data presented herein lead us  
450 to propose the following model for the mechanism of this restriction (Figure 7J). TRIM25 interacts with  
451 the viral NP and is recruited to the incoming vRNP shortly after fusion of the virion with the cellular  
452 endosomal membrane. This results in the ubiquitination of both NP and TRIM25, and the apparent  
453 displacement of NP from the viral genome, facilitating ZAP binding to the vRNA. The antiviral  
454 inhibition of the subsequent transcription and replication of the virus is dependent on this interaction,  
455 and the overall sensitivity of the virus to both ZAP and IFN-I can be modulated by the CpG content of  
456 the viral genomic RNA. This activity of TRIM25 is completely independent of RIG-I-mediated sensing  
457 of viral RNA and proinflammatory signalling but requires both isoforms of MAVS. As such we propose  
458 this as a direct antiviral restriction mechanism associated with, but independent of, classical  
459 cytoplasmic RNA pattern recognition.

460       Until recently, TRIM25 was thought to be an essential cofactor for the RIG-I helicase to  
461 recognise viral RNA species, particularly those with exposed 5' triphosphates (Gack et al., 2007;  
462 Okamoto et al., 2017). However, new data implicates Riplet as the essential E3 ligase in RIG-I  
463 activation (Cadena et al. 2019). Upon activation, RIG-I and MAVS undergo a prion-like polymerization  
464 into extended filaments that directly activate the kinase TBK1, and thus promote proinflammatory  
465 signalling (Cai et al., 2014), and it is still unclear whether TRIM25 plays further roles in the pathway.  
466 However, neither RIG-I nor TBK1 are necessary for TRIM25 to inhibit EBOV trVLP replication,  
467 implying a role distinct from classical RNA sensing.

468           The PRYSPRY domain of TRIM25 binds to and activates ZAP (Li et al., 2017; Zheng et al.,  
469 2017), which has long been known as an antiviral effector targeting various RNA viruses (Bick et al.,  
470 2003; Gao et al., 2002; Takata et al., 2017). For a number of positive sense RNA viruses, ZAP binds  
471 to the RNA genome and restricts replication by blocking its translation and/or targets viral RNA for  
472 degradation by the 3'-5' exosome (Bick et al., 2003; Li et al., 2017; Zheng et al., 2017). ZAP exists as  
473 two isoforms, ZAP-L and ZAP-S, the latter being a splice variant lacking the C-terminal catalytically  
474 inactive poly-ADP ribosyl polymerase (PARP) domain (Kerns et al., 2008). Whilst antiviral activity has  
475 been ascribed to both isoforms, ZAP-L is more active against some viruses (Bick et al., 2003; Gao et  
476 al., 2002; Li et al., 2017; Zheng et al., 2017). Upon overexpression, ZAP-L restricts EBOV trVLP more  
477 potently than ZAP-S, and we find that only ZAP-L coprecipitates with TRIM25 and NP.  
478 Overexpression of a rat ZAP has been previously shown to have an antiviral activity against EBOV,  
479 by blocking the translation of the L mRNA (Muller et al., 2007). While we also see an effect on both L  
480 mRNA and protein expression upon ZAP overexpression in our assays, this is also observable in  
481 TRIM25 KO cells where ZAP has no antiviral activity, in contrast with the impact of ZAP  
482 overexpression on EBOV genomic RNA levels which occurs in a TRIM25-dependent manner.  
483 Moreover, the TRIM25/ZAP-mediated block induced by IFN-I does not affect the expression of any  
484 viral protein expressed *in trans* and ZAP activity is modulated by the CpG content in *Renilla*,  
485 suggesting that ZAP is targeting the viral genome rather than just blocking the synthesis of L.

486           ZAP has been implicated in driving the evolution of RNA viruses towards suppression of their  
487 genomic CpG content (Fros et al., 2017; Takata et al., 2017). Most RNA viruses have a lower  
488 abundance of CpGs than would be expected by chance, and in the case of HIV-1, artificially  
489 increasing the CpG content in parts of the genome renders the virus sensitive to ZAP (Ficarelli et al,  
490 2019; Odon et al., 2019; Takata et al., 2017). Evidence suggests ZAP directly binds to viral RNAs with  
491 high CpG content and promotes their degradation (Chiu et al., 2018; Takata et al., 2017). EBOV  
492 exhibits less CpG suppression than HIV (observed vs expected ratio of 0.5 compared to 0.2).  
493 However, if we change this CpG content in either the trVLP or monocistronic systems we modulate  
494 the viral sensitivity to ZAP, and in the case of the latter, enrich ZAP/RNA interactions. Since *RLuc*  
495 expression is not required for the trVLP propagation, this result implies that ZAP can target CpGs in  
496 the EBOV genome itself.

497           How TRIM25 activates ZAP remains unclear. TRIM25 interacts with and ubiquitinates ZAP,  
498 but the latter activity is not required for its cofactor activity (Li et al., 2017; Zheng et al., 2017). Our  
499 data showing that TRIM25 displaces NP from the genome shortly after entry and that ZAP binds the  
500 vRNA in a TRIM25-dependent manner raises the possibility that its role is to expose viral RNA rather  
501 than acting directly on ZAP itself. Importantly, through this TRIM25/ZAP axis, we show that the CpGs  
502 in the genome render EBOV sensitive to IFN-I. While both TRIM25 and ZAP are IFN-inducible, they  
503 are constitutively expressed in most cells and only increase modestly at the protein level upon IFN  
504 stimulation. Therefore, despite being essential effectors targeting EBOV trVLP replication, whether  
505 this increase in their expression fully explains the IFN-regulated antiviral activity, or whether other  
506 IFN-inducible components are required needs further study (Kuroda et al. 2020).

507           Our results indicate that TRIM25 may target the structure of the EBOV (and perhaps other  
508 negative strand RNA virus) vRNP in a manner analogous to antiviral restriction by other mammalian  
509 proteins. While we see no evidence of TRIM25-dependent NP degradation, TRIM25 does appear to  
510 displace it from the viral RNA, which would likely dysregulate viral transcription and RNA replication.  
511 Similar to rhesus TRIM5 and HIV CA, as well as TRIM21 and its antibody opsonised targets (Fletcher  
512 et al., 2015; James, 2014), we see evidence of NP ubiquitination. While this correlates with antiviral  
513 activity, we do not yet know whether that is itself essential. TRIM25 forms an antiparallel dimer  
514 through its coiled-coil domain (Sanchez et al., 2014) and can then further assemble into multimers  
515 through RING domain dimerization. This positions the RING moieties at either end of the dimer, with  
516 the ligand-binding PRYSPRY located more centrally, either side of the coiled-coil. To act as an E3  
517 ligase the TRIM25 RING domain must also dimerize, which can only happen through association with  
518 another TRIM25 dimer. This has been demonstrated to be facilitated by the binding of the PRYSPRY  
519 domain to one of its cognate ligands, the RIG-I 2CARD, generating the catalytically active domain that  
520 can interact with E2 ligases (Sanchez et al., 2016). Thus, TRIM25 is only active as a multimer of  
521 dimers when bound to its target. Two possibilities exist for the conformation of these multimers from  
522 the current structural studies of TRIM25; either two TRIM25 dimers multimerize into a closed dimer of  
523 dimers, or end-to-end multimerization of RING domains could lead to extended polymers of TRIM25  
524 (Sanchez et al., 2016). We find evidence that TRIM25 interaction with NP depends on its PRYSPRY  
525 domain. Antiviral activity, however, was blocked by mutations that impair RING dimerization as well  
526 as catalytic activity, suggesting that multimerization of TRIM25 on the EBOV vRNP is also essential.

527 Since this is a helical ribonucleoprotein complex, it is possible that end-to-end multimers of TRIM25  
528 could form over such a structure, driving its disassembly, and thus recruit other RNA-directed antiviral  
529 factors and sensors.

530 Several studies have suggested that TRIM25 is an RNA-binding protein itself and that this is  
531 important for the activation of the E3 ligase activity. Two RNA binding sites have been identified. A  
532 tyrosine-rich segment of loops 2 and 3 of the PRYSPRY domain has been shown to bind the Let7  
533 miRNA both *in vitro* and *in cellulo*, and CLIP analyses has revealed many cellular TRIM25-associated  
534 RNAs with a preference for G-rich regions (Choudhury et al., 2017). A second domain, a basic patch  
535 in the unstructured region that links the coiled coil to the PRYSPRY, had also been shown to bind  
536 RNA *in vitro* (Sanchez et al., 2018). In both cases, RNA-binding has been shown to promote E3  
537 ligase activity *in vitro*, and mutation of these sites has been shown to block the substrate  
538 ubiquitination. It is unknown whether both domains are functionally independent, or whether their  
539 mutation have effects other than RNA-binding on TRIM25 substrate recognition. Interestingly, in the  
540 case of EBOV restriction we find distinct phenotypes for either site. Mutation of the PRYSPRY RBD  
541 loses antiviral activity and NP ubiquitination, but retains NP interaction consistent with this being  
542 RNase insensitive. Mutation of the basic patch (7KA) similarly loses antiviral activity, but unlike the  
543 RBD deletion, also loses NP interaction similar to a full PRYSPRY deletion. Given that the basic patch  
544 lies within a linker between the coiled-coil and the PRYSPRY, it is possible that such a change may  
545 affect the spacing and positioning of the PRYSPRY relative to the coiled-coil for multimeric substrate  
546 engagement, as is well-known for other TRIM-family members. The implication of RNA-binding in  
547 TRIM25's antiviral mechanism is attractive in the light of our data that shows that it can dissociate NP  
548 from the genome even when transcription is inhibited. Cryo-EM structures of the EBOV vRNP show  
549 RNA tightly wound around helical NP assemblies, with each protomer engaging 6bp of RNA (Su et  
550 al., 2018; Wan et al., 2017). The RNA is clamped into a cleft, reducing its accessibility to cellular  
551 factors. In such a configuration, TRIM25 would have to interact with NP to access the vRNA, which is  
552 consistent with our mutagenesis data. Recent studies have shown that nuclear TRIM25 associates  
553 with influenza virus vRNPs to block transcriptional elongation (Meyerson et al., 2017). While there are  
554 differences in these studies taken together, these observations raise the possibility that TRIM25 may  
555 have a broad direct antiviral activity against negative-strand RNA viruses with helical vRNPs. More

556 widely, these data also suggest that TRIM25 can act as a ZAP cofactor by disassembling RNA/protein  
557 structures to expose CpG-rich RNAs.

558 Further to their direct antiviral restriction, several TRIMs ligand-induced synthesis of K63  
559 polyubiquitin chains act as platforms for the activation of TAK1 and subsequently NFkB-dependent  
560 proinflammatory gene expression (Fletcher et al., 2015; Pertel et al., 2011). TRIM5 acts effectively as  
561 a pattern recognition receptor for the hexameric array of retroviral capsids, and TRIM21 for antibody-  
562 bound microbes entering the cytoplasm. This therefore raises the question of whether the “classical”  
563 cytoplasmic sensing mechanisms themselves are linked to a direct virus restriction. The requirement  
564 for MAVS in TRIM25/ZAP-mediated restriction of EBOV replication would suggest that this may be  
565 the case for the cytoplasmic RNA sensing pathway. Intriguingly, we find that both isoforms of MAVS  
566 are required. Since signalling through MAVS is not required for the direct antiviral activity, we suggest  
567 that it may act as a regulatory part of the complex. MAVS localizes primarily to mitochondrial  
568 associated membranes and peroxisomes, and as such forms a platform for RNA sensing via RIG-I  
569 and MDA5, and we suggest that this platform may also allow the recruitment of directly acting antiviral  
570 factors, as well as a link to the ultimate disposal of viral components by the cell. Various studies have  
571 linked MAVS, and its functional paralogue in DNA sensing, STING, to autophagic degradation upon  
572 activation (Liu et al., 2018; Zhao et al., 2012).

573 TRIM25 is a common target for antagonism by RNA viruses. Influenza A virus NS1 blocks  
574 TRIM25 activity to disable RIG-I in infected cells (Gack et al., 2009), whereas dengue virus encodes a  
575 subgenomic RNA that functions analogously (Manokaran et al., 2015). We see no evidence of a direct  
576 counteractivity for human TRIM25 encoded by EBOV. VP24, which blocks signalling from IFNAR1/2,  
577 prevents the upregulation of ISGs after IFN-I exposure. In cells already exposed to IFN-I at the time of  
578 infection, VP24 would not be expected to have any effect, and in any case is encoded by the trVLP.  
579 VP35, is expressed *in trans* in the trVLP system and counteracts RIG-I and protein kinase R (PKR)  
580 but has no known activity to inhibit TRIM25 (Basler, 2015). However, humans are not the virus’  
581 natural host, and it is possible that filoviruses do have a countermeasure/resistance mechanism to  
582 TRIM25/ZAP in other mammals, particularly putative bat reservoir species. Interestingly, adaptation of  
583 EBOV to infection of both mice and guinea pigs is associated with amino acid changes in NP.  
584 Furthermore, lethality of mouse adapted EBOV in C57BL/6 mice requires the knockout of *mavs* (Dutta  
585 et al., 2017). Whilst this has been interpreted to be due to enhanced RNA sensing, given our

586 observations that both MAVS isoforms are required for TRIM25/ZAP-mediated antiviral activity, it is  
587 also possible that differences in direct restriction of the vRNP underlie this species-specific tropism.  
588 Both ZAP and TRIM25 are under high levels of positive selection in mammals, suggesting a  
589 continuous adaptation to new viral pathogens (Kerns et al., 2008).

590 In summary, our studies have revealed that TRIM25 and ZAP are major contributors to an  
591 IFN-induced restriction of EBOV replication. We provide evidence that TRIM25 directly associates  
592 with the incoming vRNP and dissociates NP from the genome. These data further suggest TRIM25 as  
593 a key restriction factor for EBOV, and that its role is to expose CpG rich areas of the viral genome to  
594 ZAP, which could then degrade or inhibit translation of the viral RNAs.

595

596

597

## 598 **Material and Methods**

599

### 600 **Cell lines**

601 HEK293T and U87-MG cells were obtained from ATCC. HEK293T-TIM1 and U87-MG-TIM1 cells  
602 were produced by transduction of the parental cell lines with a MLV-based lentiviral vector packaging  
603 a pCMS28 vector genome (Gallois-Montbrun et al., 2007) encoding the TIM1 construct, and selecting  
604 the cells in puromycin. Alternatively, some of the CRISPR KO cell lines (described below) were  
605 derived to stably express TIM1 by transduction with a MLV-based retroviral vector packaging a  
606 pLHCX (Clontech) vector genome encoding TIM1, and selecting in hygromycin. All cells used on this  
607 study were maintained in high glucose DMEM supplemented with GlutaMAX, 10% fetal bovine serum  
608 (FBS), 20µg/mL gentamicin, and incubated at 37°C with 5% CO<sub>2</sub>.

609

### 610 **Generation of CRISPR Knock-Out cell lines**

611 CRISPR guides targeting *E.coli* LacZ gene, or human TRIM25, ZAP, RIG-I, FL-MAVS, FL-MAVS/  
612 miniMAVS, TBK1 and KHNYN genes were cloned into *BsmBI* restriction enzyme sites in the lentiviral  
613 CRISPR plasmid lentiCRISPRv2 (Addgene). LentiCRISPR VLPs were produced on HEK293T cells  
614 seeded on a 10cm dish, and transfected with 8µg of lentiCRISPRv2-Guide, 8µg of pCRV1-HIV-Gag  
615 Pol (Neil et al., 2008) and 4µg of pCMV-VSV-G (Neil et al., 2008). Supernatants were harvested 48

616 hours later and used to transduce HEK293T or U87-MG cells, followed by selection in puromycin.  
617 Furthermore, MAVS isoforms expression were rescued on HEK293T FL-MAVS & miniMAVS CRISPR  
618 DKO by transduction with a MLV-based lentiviral vector packaging a pCMS28 vector genome  
619 encoding CRISPR-resistant MAVS (MAVS<sup>CR</sup>), miniMAVS (MAVS M1A<sup>CR</sup>) or FL-MAVS (MAVS  
620 M142A<sup>CR</sup>) constructs, and selecting cells in Blasticidin.

621 Additionally, the CRISPR guide targeting NPC1 gene was cloned into lentiCRISPR\_v2\_GFP as above  
622 (Addgene). The generated plasmid was transfected into HEK293T-TIM1 cells, which were  
623 subsequently sorted by flow cytometry, on a BD FACSCantoll, on the basis of their GFP expression.  
624 Finally, NPC1 expression was rescued on these HEK293T NPC1 CRISPR KO-TIM1 cells by  
625 transduction with a MLV-based lentiviral vector packaging a pCMS28 vector genome encoding NPC1  
626 construct, and selecting the cells in Blasticidin to generate the HEK293T NPC1 CRISPR KO-TIM1 +  
627 NPC1 cell line.

628 All CRISPR guides sequences are in Table S2.

629

### 630 **Generated Plasmids**

631 TRIM25wt, TRIM25  $\Delta$ RING and TRIM25  $\Delta$ SPRY were PCR amplified from the ISG library plasmid  
632 pcDNA-DEST40-TRIM25 (Kane et al., 2016) using forward and reverse primers encoding 5'  
633 overhangs with, respectively, *EcoRI* and *XhoI* restriction sites. Purified amplification products were  
634 then inserted into the corresponding sites on a pcDNA3.1 backbone. pcDNA3.1-TRIM25  
635  $\Delta$ RING $\Delta$ SPRY was generated by PCR amplification using pcDNA3.1-TRIM25  $\Delta$ RING as template and  
636 sub-cloning the PCR product into pcDNA3.1 backbone as above.

637 pcDNA3.1-TRIM25wt CR (CRISPR-resistant) was generated by overlapping PCR from pcDNA3.1-  
638 TRIM25wt, using internal primers that inserted silent mutations on the CRISPR-guides target  
639 sequence and the above mentioned TRIM25 ORF flanking forward and reverse primers with *EcoRI*  
640 and *XhoI* restriction sites as 5' overhangs. pcDNA3.1-TRIM25wt CR was used as template for all  
641 CRISPR-resistant TRIM25 mutants used on this study. These mutants were generated, unless  
642 otherwise mentioned, by overlapping PCR using internal primers that inserted silent mutations, and  
643 the above mentioned forward and reverse primers encoding 5' overhangs with *EcoRI* and *XhoI*  
644 restriction sites. TRIM25 L7A CR was generated by PCR amplification of TRIM25wt CR with  
645 L7A\_CR\_Fwd primer with a 5' *EcoRI* overhang and the above mentioned TRIM25\_ *XhoI* Rev primers.

646 Purified amplification products were then inserted into the corresponding sites on a pcDNA3.1  
647 backbone.

648

649 pCMS28-Blast-MAVS<sup>CR</sup> was constructed by overlapping PCR from pCR3.1-MAVS (Pertel et al.  
650 2011), using internal primers that inserted a silent mutation in the NGG PAM of the CRISPR guide  
651 target sequence alongside forward and reverse primers encoding 5' overhangs with *NotI* and *XhoI*  
652 restriction sites respectively. pCMS28-Blast-MAVS<sup>CR</sup> was then used as a template and backbone for  
653 the MAVS CRISPR resistant plasmids used in this study. pCMS28-Blast-M142A<sup>CR</sup>, expressing only  
654 the FL-MAVS isoform, was created by overlapping PCR from pCMS28-Blast-MAVS<sup>CR</sup> using internal  
655 primers substituting the methionine for an alanine at position 142, in conjunction with the above  
656 mentioned forward and reverse primers with *NotI* and *XhoI* 5' overhangs. Furthermore, pCMS28-  
657 Blast-M1A<sup>CR</sup> was created by PCR amplification using forward and reverse primers encoding 5'  
658 overhangs with *NotI* and *XhoI* restriction sites respectively, where the forward primer also encoded for  
659 a mutation in the first methionine thus disrupting the expression of the FL-MAVS isoform. Amplified  
660 DNA fragments were then inserted into the pCMS28-Blast backbone digested with *NotI* and *XhoI*.

661

662 pCMS28-TIM1 was generated by sub-cloning the product of pCAGGS-TIM1 digestion with *EcoRI* and  
663 *NotI* enzymes into the corresponding sites in pCMS28 backbone. Additionally, pCAGGS-TIM1 served  
664 also as template for the PCR amplification of TIM1, and the product inserted into *XhoI* and *NotI* sites  
665 on pLHCX backbone to generate pLHCX-TIM1.

666 Finally, pBABE-NPC1 (Carette et al., 2011) served as template for the PCR amplification of NPC1,  
667 and the PCR product was digested with *EcoRI/XhoI* and inserted into the corresponding restriction  
668 sites in pCMS28-Blasticidin to generate pCMS28-Blast-NPC1.

669 All primers used for cloning are described on Table S3.

670

671 To generate p4cis-vRNA-CpG low RLuc we have synthesised a 2141nt-long DNA fragment  
672 (sequence available upon request), with 61 silent mutations that removed all CpG dinucleotides  
673 present in the *Renilla* luciferase gene of the p4cis-vRNA-RLuc sequence. This DNA fragment was  
674 digested with *Apal* and *BlpI* and inserted into the corresponding sites in the original p4cis-vRNA-RLuc  
675 minigenome plasmid. On the other hand, the monocistronic plasmid pT7-1cis-vRNA-CpG low-EBOV-



676 hrluc expressing a Renilla luciferase with no CpG's was constructed by overlapping PCR using p4cis-  
677 vRNA-CpG low as template. Briefly, two fragments were amplified by PCR with the primers P4 cis  
678 Low CpG TRAIL F and P4 cis vRNA *Xma*I R (size 793bp) and P4 cis Low CpG TRAIL R and P4 cis  
679 vRNA *Bsp*I F (size 1626bp). These DNA fragments were joined together by PCR using the outer  
680 primers with the *Bsp*I and *Xma*I restriction sites in their 5' overhangs, digested with these enzymes  
681 and cloned into the pT7-1cis-vRNA-EBOV-hrluc plasmid to create a low CpG renilla monocistronic  
682 EBOV plasmid.

683

#### 684 **Ebola transcription- and replication-competent virus-like particle (trVLP) assays**

685 Unless otherwise stated, EBOV trVLPs (Watt et al., 2014) were produced in HEK293T producer cells  
686 (also called p0 cells) seeded in a 10 cm dish, and transfected with 625ng of pCAGGS-NP, 625ng of  
687 pCAGGS-VP35, 375ng of pCAGGS-VP30, 5µg of pCAGGS-L, 400ng of p4cis-vRNA-Rluc (or  
688 corresponding CpG low variant of this minigenome), and 250ng of pCAGGS-T7, using TransIT-LT1  
689 transfection reagent. Medium was exchanged 4-6 hours post-transfection, and trVLP-containing  
690 supernatants were harvested 48-72 hours later and cleared by centrifugation for 5 minutes at 300xg.  
691 Typically, 5 to 50µl of cleared supernatants were transferred to p1 target cells that had been seeded  
692 on 24-well plates, and transfected 24 hours previously with 31.25ng of pCAGGS-NP, 31.25ng of  
693 pCAGGS-VP35, 18.75ng of pCAGGS-VP30, 250ng of pCAGGS-L (or pCAGGS-L-HA where  
694 mentioned) and 5ng of pFluc per well. In specific experiments, cells were also co-transfected at this  
695 stage with 125ng of the ISG of interest. Furthermore, if p1 target cells were not stably expressing  
696 TIM1, they were additionally co-transfected with 62.5ng of pCAGGS-TIM1 per well. Medium was  
697 changed 4-6 hours post-transfection and, in experiments performed either with interferons or T705  
698 (Favipiravir), increasing amounts of universal IFN-I, IFN alpha 2a, IFN beta 1a (PBL Interferon  
699 Source) or T705 (AdooQ) were added to the cells at this stage. Cells were infected the following day  
700 and medium was again changed 4-6 hours after infection of p1 target cells, and 24 hours later cells  
701 were lysed with Passive Lysis 1x and reporter activities measured with Dual Luciferase Reporter Kit  
702 (Promega). At the same time supernatants from p1 cells were cleared by centrifugation and passaged  
703 onto fresh HEK293T-TIM1 p2 target cells, seeded in 24-well plates and transfected 24 hours earlier  
704 exclusively with the EBOV RNP components and pFluc (same quantities as above). These cells were  
705 lysed 24 hours post infection and reporter activities measured as already described.

706

707 Specific experiments required the use of concentrated EBOV trVLPs. For that purpose trVLPs were  
708 produced as above, and treated for 2 hours with 10U/ml DNase-I (Roche) before being concentrated  
709 by ultracentrifugation through a 20% sucrose/PBS cushion (28,000 rpm on a Sorvall Surespin rotor,  
710 for 90 min at 4°C), and resuspended overnight in serum-free DMEM medium.

711

## 712 **ISG Screen**

713 ISG screen was conducted on HEK293T-TIM1 cells in a 96-well plate format, using a library of human  
714 ISGs encoded by pcDNA-DEST40 (Kane et al., 2016). 50ng of individual ISG-expressing plasmids  
715 were co-transfected onto p1 target cells together with EBOV RNP expressing plasmids and pFluc, as  
716 described above in the trVLP assay. p1 target cells were infected with EBOV trVLPs 24 hours post-  
717 transfection and medium changed 4 hours later. 24 hours post-infection the cells were lysed with  
718 Passive Lysis 1x and reporter activities measured with Dual Luciferase Reporter Kit. At the same time  
719 supernatants from p1 cells were used to infect fresh HEK293T-TIM1 p2 target cells, seeded in 96-well  
720 plates and transfected 24 hours earlier exclusively with the EBOV RNP components (as described  
721 above). These cells were lysed 24 hours post infection and reporter activities measured as already  
722 previously described. For each ISG, the yield of infectious virions was expressed as a percentage of  
723 the mean value across each library plate.

724

## 725 **Ebola monocistronic genome assays**

726 VLPs carrying the monocistronic EBOV genomes were produced in HEK293T cells seeded in 10cm  
727 dishes, and transfected with 625ng of pCAGGS-NP, 625ng of pCAGGS-VP35, 375ng of pCAGGS-  
728 VP30, 300ng of pCAGGS-VP24, 5µg of pCAGGS-L, 1.25µg of pCAGGS-VP40, 1.25µg of pCAGGS  
729 GP, 1.25µg of pCAGGS-T7, 1.25µg of pT7-1cis-vRNA-EBOV-hrluc (or corresponding CpG low  
730 variant) and 125ng of pFLuc, using TransIT-LT1 transfection reagent. Medium was exchanged 4-6  
731 hours post-transfection and supernatants harvested 72 hours later as described before. Experiments  
732 with these monocistronic VLPs were performed following the same proceeding described above for  
733 the EBOV trVLPs.

734

## 735 **Nanoluciferase experiments**

736 EBOV trVLPs were produced containing a minigenome that encoded Nanoluciferase rather than  
737 Renilla luciferase using the protocol previously described for EBOV trVLP production under section  
738 heading Ebola transcription- and replication-competent virus-like particle (trVLP) assays. Target cells  
739 were plated in a 96 well format and spininfected with 200µl of cleared p0 supernatant the next day.  
740 Cells were then washed three times in medium 6 hours after infection. Cells were lysed with passive  
741 lysis buffer 48 hours after infection and reporter activity was then measured with a Nano-Glo  
742 luciferase assay system (Promega). For IFN-I based experiments increasing amounts of IFN-I were  
743 added 16 hours before infection and for TRIM25 overexpression experiments cells were reverse  
744 transfected with either TRIM25 or YFP as well as TIM1 24 hours before infection.

745

#### 746 **Reporter Gene Assays**

747 For transient reporter gene assays, HEK293T cells were seeded on 24-well plates and transfected  
748 with 100ng of control pcDNA-DEST40-GFP or pcDNA-DEST40 expressing individual ISG of interest  
749 in combination with 10ng of 3xkB-pCONA-Fluc (Mankouri et al., 2010), or pTK-ISG56-Luc (kindly  
750 provided by Greg Towers, UCL), or pNL(NlucP/ISRE/Hygro) (Promega) luciferase reporters and 10ng  
751 of pCMV-RLuc (Mankouri et al., 2010). Cells were lysed with 1x Passive Lysis buffer 24 or 48 hours  
752 post-transfection, and Firefly and Renilla luciferase activities in the lysates were measured using a  
753 dual luciferase kit (Promega).

754

#### 755 **Influenza A Minigenome Assay**

756 Influenza A polymerase activity was determined using a minigenome reporter containing the Firefly  
757 luciferase gene in a negative sense, flanked by the non-coding regions of the influenza NS gene  
758 segment transcribed from a species-specific pol I plasmid with a mouse terminator sequence  
759 (Moncorge et al., 2010; Pleschka et al., 1996). Each viral polymerase component was expressed from  
760 separate pCAGGS plasmids encoding A/H1N1/Eng/195 NP, PA, PB1 and PB2 (Moncorge et al.,  
761 2013). To analyse polymerase activity, HEK293T LacZ, HEK293T RIG-I CRISPR and HEK293T ZAP  
762 CRISPR cells were seeded in 24-well plates 24 hours prior transfection with 10ng PB1, 10ng PB2,  
763 5ng PA, 15ng NP, 10ng pHPMO1-Firefly, 2.5ng pCAGGS-Renilla (transfection control, (Cauldwell et  
764 al., 2013) and increasing amounts of pcDNA3.1-TRIM25 using Trans-IT LT1. Cells were lysed 24

765 hours post-transfection with 1x Passive Lysis and reporter activities measured using a dual luciferase  
766 kit (Promega).

767

#### 768 **Lentiviral Assay**

769 HIV-based lentiviral VLPs expressing GFP were produced on HEK293T cells seeded on a 10cm dish,  
770 and transfected with 6µg of pHR' Sin CSGW (Demaison et al., 2002), 4 µg of pCRV-HIV Gag Pol and  
771 2µg of pCMV-VSV-G using TransIT-LT1. Medium was changed 4-6 hours post transfection and VLP-  
772 containing supernatants harvested 48 hours later and cleared by centrifugation (5 minutes, 1200rpm).  
773 U87-MG LacZ CRISPR control and U87-MG TRIM25 CRISPR KO cells were treated overnight with  
774 increasing amounts of IFN-I and then transduced with a fixed amount of pCSGW-HIV GP-VSVG  
775 VLPs prepared as above. 48 hours post-transduction cells were harvested and analysed for GFP  
776 expression by flow cytometry.

777

778

#### 779 **Blam Assay**

780 Ebola BlamVP40-Ebola GP and Ebola BlaVP40-VSVg VLPs were produced on HEK293T cells. For  
781 that purpose, cells were plated in 10cm dishes and transfected with 6µg of pcDNA3.1-EBOV BlaVP40  
782 (Tscherne and Garcia-Sastre, 2011) and 15µg of either pCAGGS-Ebola GP (Long et al., 2015) or  
783 pCMV-VSVG using PEI max, and media was changed to OptiMEM 4-6 hours post-transfection.  
784 Supernatants were harvested past 48 hours and cleared by centrifugation (5 minutes, 1500rpm)  
785 before storage.

786 HEK293TIM-1 cells pre-treated with IFN-I, or transfected with either GFP or TRIM25, were 24 hours  
787 later transduced with Blam VLPs prepared as above, and incubated for 3-5 hours. After incubation  
788 cells were washed once with RPMI 1640 (no phenol red) medium (RPMI), and incubated in 1x loading  
789 solution of LiveBLazer FRET-B/G Loading Kit (Life Technologies) with CCF2-AM for 1 hour (dark,  
790 room temperature). Following, cells were washed with 2.5mM Probenecid (Sigma) in RPMI and  
791 incubated in the same medium overnight (dark, room temperature). Next day, cells were analyzed by  
792 flow cytometry using BD FACSCanto II. Cells were gated on live cells and analyzed for CCF2  
793 cleavage as readout for Blam VLP entry with Pacific Blue (cleaved) and FITC (not cleaved) laser  
794 channels, and using FlowJo 10.4.2 software for analysis.

795

796 **Production and Purification of anti-EBOV antibodies**

797 Rabbit antibodies against Ebola virus proteins NP, VP35 and VP30 were produced by Lampire  
798 Biological Laboratories using their standard protocol. In brief, two rabbits per each viral peptide were  
799 immunized with 0.50mg of antigen mixed with 0.5ml of Complete Freund's adjuvant. Two further  
800 boosts were performed in the same conditions at days 21 and 42. Serums used in this manuscript  
801 were collected by day 50. The sequences of the viral protein peptides used in the immunizations are  
802 as follow:

803 NP: DEDDEDTKPVPNRSTKGGQ

804 VP35: EAYWAEHGQPPPGPSLYEE

805 VP30: QLNITAPKDSRLANPTADD

806

807 For microscopy staining of the Ebola NP protein (see below), we have purified a fraction of the serum  
808 collected from rabbits immunized with the viral NP peptide. For that purpose, protein A beads  
809 (Invitrogen) were equilibrated by washing them with PBS, and then incubated with the serum for 2  
810 hours at room temperature. Following, the beads were added into a column cartridge and washed 3  
811 times with 10ml of PBS. IgGs were then eluted with 0.1M Glycine pH 3.5 in 5 batches of 1ml. IgG  
812 eluates were adjusted to pH 7.0 with 2M Tris Base, pH 9.0, and concentrated on Amicon Ultra  
813 centrifugal filter units (MWCO 10kDa) (SIGMA) with buffer exchanged to PBS. Approximate  
814 concentration of purified antibodies was determined by spectrometry (280nm) and fragments  
815 analyzed on SDS-PAGE.

816

817 **Analysis of cellular and viral proteins expression**

818 Cells used in this study were seeded on 24-well plates, and transfected the following day with EBOV  
819 RNP-expressing plasmids as described above, either in combination with 150ng of individual ISG-  
820 expressing plasmids per well or followed by the addition 4 hours post-transfection of increasing  
821 amounts of type-I interferon. 24 hours later cellular lysates were subjected to SDS-PAGE and western  
822 blots performed using mouse monoclonal antibodies anti-HSP90 (Santa Cruz), anti-HA (Covance) or  
823 anti-TRIM25 (Abcam), or rabbit antibodies anti-EBOV NP, anti-EBOV VP35, anti-EBOV VP30, anti-  
824 TRIM25 (Abcam), anti-RIG-I (Enzo), anti-MAVS/VISA (Bethyl), anti-TBK1 (Abcam), anti-ZCCHV/ZAP

825 (Abcam) or anti-NPC1 (Thermo Fisher). Visualizations were done by Image-Quant using either HRP-  
826 linked anti-mouse or anti-rabbit secondary antibodies (Cell Signaling).

827

### 828 **Immunoprecipitations**

829 To address the interaction of TRIM25 with EBOV-NP proteins cells were seeded in 6-well plates and  
830 transfected with 500ng of either pcDNA3.1-GFP or pcDNA3.1-TRIM25wt, or mutants thereof, in  
831 combination with 125ng of pCAGGS-NP and/or 125ng of pCAGGS-VP35. At 24 hours post-  
832 transfection cells were lysed with a RIPA buffer containing 50mM Tris-HCl (pH 7.4), 150mM NaCl,  
833 0.1% SDS, 0.5% sodium deoxycholate, 1% NP-40 and protease inhibitors (Roche). Following  
834 sonication, lysates were immunoprecipitated overnight with either rabbit anti-TRIM25 (Abcam) or  
835 rabbit anti-EBOV NP antibodies and protein G beads at 4°C on a tube rotator. On specific  
836 experiments, cellular lysates were treated prior immunoprecipitation with 10µg/ml of RNaseA  
837 (SIGMA) for 2 hours at 37°C.

838 For ubiquitination-related pull-downs cells were plated similarly in 6-well plates and transfected with  
839 500ng of either pcDNA3.1-GFP or pcDNA3.1-TRIM25wt, in combination with 125ng of pCAGGS-  
840 VP35, 90ng of pCAGGS-VP30 and 1.2µg pCAGGS-L together with 125ng of pCAGGS-NP and/or  
841 100ng of pMT123-HA-Ub (Treier et al., 1994). At 24 hours post-transfection cells were lysed with a  
842 buffer containing 50mM Tris-HCl (pH 7.4), 150mM NaCl, 5mM EDTA, 5% Glycerol, 1% Triton-X 100,  
843 10mM N-Ethylmaleimide (NEM) and protease inhibitors. Lysates were treated as above and  
844 immunoprecipitated overnight either with rabbit anti-EBOV-NP or mouse anti-HA (Covance).

845 Cell lysates and pull-down samples were subjected to SDS-PAGE and Western blots performed using  
846 antibodies against HSP90 (Santa Cruz), TRIM25 (Abcam), EBOV-NP, EBOV-VP35, HA-tag  
847 (Rockland) and ZAP (Abcam). Blots were visualized by ImageQuant using anti-mouse or anti-rabbit  
848 HRP-linked antibodies (Cell Signaling).

849

### 850 **RNA Immunoprecipitation**

851 Cells were plated on 10cm dishes and transfected in the absence of EBOV RNP expressing plasmids  
852 with 2.5µg of pcDNA3.1-GFP, pcDNA3.1-TRIM25wt (or mutants thereof), or pcDNA4-ZAP-L (Kerns et  
853 al., 2008) and medium changed 4-6 hours later. Alternatively, cells were treated overnight with  
854 1000U/ml of IFN-I or 250µM of T705. The following day cells were infected for 3 hours with 3ml of

855 wild-type- or CpG low-EBOV trVLPs, or alternatively with the same volume of EBOV monocistronic  
856 VLPs, and then gently washed in PBS prior to 'on dish' irradiation with 400mJ/cm<sup>2</sup> using a UV  
857 Stralinker 2400. Cells were subsequently lysed in 1ml of RIPA buffer (see above for composition) and  
858 sonicated. Cleared lysates were immunoprecipitated overnight at 4°C with rabbit anti-EBOV NP or  
859 rabbit anti-ZAP antibodies and protein G beads. Following 3 washes with RIPA buffer, the beads were  
860 resuspended in 200µl of RIPA and boiled for 10min to decouple protein/RNA complexes from the  
861 beads. Finally, input and pulldown samples were incubated with proteinase K (Thermo Fisher,  
862 2mg/ml) for 1hr at 37°C, and then boiled for 10 minutes to inactivate the enzyme. Samples were  
863 stored at -20°C for downstream processing.

864

#### 865 **RNA Purification and Quantitative RT-PCR**

866 Total RNA was isolated and purified from EBOV trVLP infected cells using a QIAGEN RNAeasy kit,  
867 while viral RNA was extracted from supernatants using a QIAGEN QIAmp Viral mini kit, both  
868 accordingly with the manufacture instructions. Unless otherwise stated, 50ng of purified RNA was  
869 reverse transcribed by random hexamer primers using a High Capacity cDNA Reverse Transcription  
870 kit (Applied Biosystems). Alternatively, strand-specific reverse transcription primers were used to  
871 generate cDNAs for viral genomic RNA (-vRNA, EBOV -vRNA RT primer), complementary RNA  
872 (+cRNA, EBOV +cRNA RT primer), or viral mRNA (oligo dT). Of the reaction, 5µl were subjected to  
873 quantitative PCR using primer/probe sets for human *Gapdh* (Applied Biosystems), and EBOV trVLP  
874 5'-trailer region, L-Pol RNA or VP40 RNA (primer/probe sequences in Table S4). Quantitative PCRs  
875 were performed on a QuantStudio 5 System (Thermo Fischer) and absolute quantification data  
876 analyzed using Thermo Fisher's Cloud Connect online software.

877 Input and pulldown samples from RNA immunoprecipitations were first resuspended in QIAzol  
878 (QIAGEN), and passed through QIAshredder columns (QIAGEN) for homogenization, and then  
879 passed to phase lock gel tubes (VWR) prior to addition of chloroform (SIGMA). After manually  
880 shaking the tubes, samples were centrifuged full-speed, for 15min at 4°C. The aqueous phase was  
881 passed to a new tube, and isopropanol added. After 10 minutes at room temperature, tubes were  
882 centrifuged as before and supernatants removed. RNA pellets were subsequently washed with 75%  
883 Ethanol, and span at 7500xg, for 5 minutes at 4°C. Following aspiration of the supernatants, RNA

884 pellets were left to dry and then resuspended in RNase-free water. Downstream processing for  
885 reverse transcription and quantitative RT-PCR was done as detailed above.

886

### 887 **Deubiquitinase Assays**

888 Prior to the deubiquitinase reactions, immunoprecipitations were performed using similar conditions to  
889 the ones described above for ubiquitination-related pull-downs. Briefly, HEK293T TRIM25 CRISPR  
890 KO cells were plated in 6 well plates and transfected with 500ng of either pcDNA3.1-YFP or  
891 pcDNA3.1-TRIM25<sup>CR</sup> in combination with 125ng of pCAGGS-VP35, 90ng of pCAGGS-VP30, 1.2µg of  
892 pCAGGS-L and 125ng of pCAGGS-NP, in the absence of ectopically expressed ubiquitin. Cells were  
893 lysed 48 hours post-transfection and lysates immunoprecipitated overnight with rabbit anti-EBOV-NP  
894 antibody using protein G agarose beads. Following immunoprecipitation, beads were treated with  
895 UbiCREST Deubiquitinase Enzyme Kit (BostonBiochem) following manufacturer's instructions. Briefly,  
896 beads were washed several times before being equally split into separate tubes and treated with  
897 either USP2 or left untreated (NTC, non-treated control), for 30 minutes at 37°C. Input lysates and  
898 pull-down beads were subjected to SDS-PAGE and Western blots performed using antibodies against  
899 HSP90 (Santa Cruz), TRIM25 (Abcam) and EBOV-NP. Blots were visualized by ImageQuant using  
900 anti-mouse or anti-rabbit HRP-linked antibodies (Cell Signaling).

901

### 902 **Microscopy**

903 Cells were seeded on 24-well plates on top of coverslips pre-treated with poly-L-lysine to improve  
904 their adherence. For transient assays, cells were transfected with different combinations of EBOV  
905 RNP plasmids using the amounts described previously. Alternatively, cells were infected with 30µl of  
906 concentrated EBOV trVLPs in the absence of ectopically expressed EBOV RNP components.  
907 Cells were fixed 24 hours post-transfection, or 3 hours post-infection, with 4% paraformaldehyde for  
908 15 minutes at room temperature, and then washed first with PBS, followed by a second wash with  
909 10mM Glycine. Next, cells were permeabilized for 15 minutes with a PBS solution complemented with  
910 1% BSA and 0.1% Triton-X. Subsequently, cells were stained with mouse anti-TRIM25  
911 (Abcam,10µg/ml) and purified rabbit anti-EBOV NP (1:50) antibodies diluted in PBS/0.01% Triton-X  
912 for an hour at room temperature. Cells were washed 3 times in PBS/0.01% Triton-X, followed by an  
913 incubation with Alexa Fluor 594 anti-mouse and Alexa Fluor 488 anti-rabbit antibodies (Molecular



914 Probes, 1:500 in PBS/0.01% Triton-X) for 45 minutes in the dark. Finally, coverslips were washed  
915 once again 3 times with PBS/0,01% Triton-X and then mounted on slides with Prolong Diamond  
916 Antifade Mountant with DAPI (Invitrogen). Imaging was performed on a Nikon Eclipse Ti Inverted  
917 Microscope, equipped with a Yokogawa CSU/X1-spinning disk unit, under 60-100x objectives and  
918 Laser wavelengths of 405nm, 488nm and 561nm. Image processing and co-localization analysis was  
919 performed with NIS Elements Viewer and Image J (Fiji) software.

920

### 921 **Statistical Analysis**

922 Statistical significance was determined using paired two-tailed t tests calculated using the Prism  
923 software. Significance was ascribed to p values as follows: \*p > 0.05, \*\*p > 0.01, and \*\*\*p > 0.001.

924 Data relative to viral based assays, signalling reporter assay and Blam assays were performed in  
925 duplicate in at least 3 independent experiments, and error bars represent +/-SEM.

926 For RNA IP experiments each data point is represented as average of three independent experiments  
927 +/-SD.

928

929

930

### 931 **Contact for Reagents and Resources Sharing**

932 Further information and requests for resources and reagents should be directed to and will be fulfilled  
933 by the Lead Contact, Stuart J.D. Neil ([stuart.neil@kcl.ac.uk](mailto:stuart.neil@kcl.ac.uk)). Distribution of the CRISPR cell lines,  
934 antibodies, EBOV p4cis-CpG low-vRNA-Rluc and pT7-1cis-vRNA CpG low-EBOV-hrluc minigenomes  
935 generated in the course of this work will require signing of Material Transfer Agreements (MTA) in  
936 accordance with policies of King's College London. All requests for other trVLP components should  
937 be directed to Thomas Hoenen ([thomas.hoenen@fli.de](mailto:thomas.hoenen@fli.de)).

938

### 939 **Author Contributions**

940 Conceptualization: RPG, HW, SJW, CMS, SJDN ; Methodology: RPG, HW, KLS, FD, BSB, DG, TH,  
941 SJW, CMS, SJDN; Investigation: RPG, HW, KLS, FD, BSB; Visualisation: RPG, HW, KLS, FD, CMS,  
942 SJDN; Supervision: SJDN; Project Administration: SJDN; Funding Acquisition: SJDN; Writing –

943 Original Draft: RPG, HW, SJDN; Writing - Review and Editing: RPG, HW, KLS, FD, TH, SJW, CMS,  
944 SJDN

945

#### 946 **Acknowledgments**

947 We thank other members of the Neil and Swanson laboratories for helpful discussions and Wendy S  
948 Barclay (Imperial College London) for materials. We are grateful to Stefan Becker and his group for  
949 advice. These studies were funded by an MRC Discovery Award MC/PC/15068 and a Wellcome Trust  
950 Senior Research Fellowship (WT098049AIA) to SJDN, a Guy's and St Thomas's Charity Challenge  
951 Fund grant to CMS and SJDN and MRC research grant MR/M019756/1 to CMS. This project has  
952 received funding from the European Union's Horizon 2020 research and innovation programme under  
953 the Marie Skłodowska-Curie grant agreement No. 750621 (KLS).

954

#### 955 **Conflict of interests**

956 All authors declare no conflict of interests.

957

958 **References**

- 959 Amman, B.R., Nyakarahuka, L., McElroy, A.K., Dodd, K.A., Sealy, T.K., Schuh, A.J., Shoemaker,  
960 T.R., Balinandi, S., Atimnedi, P., Kaboyo, W., *et al.* (2014). Marburgvirus resurgence in Kitaka  
961 Mine bat population after extermination attempts, Uganda. *Emerg Infect Dis* 20, 1761-1764.  
962
- 963 Basler, C.F. (2015). Innate immune evasion by filoviruses. *Virology* 479-480, 122-130.  
964
- 965 Basler, C.F., Mikulasova, A., Martinez-Sobrido, L., Paragas, J., Muhlberger, E., Bray, M.,  
966 Klenk, H.D., Palese, P., and Garcia-Sastre, A. (2003). The Ebola virus VP35 protein inhibits  
967 activation of interferon regulatory factor 3. *J Virol* 77, 7945-7956.  
968
- 969 Beachboard, D.C., and Horner, S.M. (2016). Innate immune evasion strategies of DNA and  
970 RNA viruses. *Curr Opin Microbiol* 32, 113-119.  
971
- 972 Bick, M.J., Carroll, J.W., Gao, G., Goff, S.P., Rice, C.M., and MacDonald, M.R. (2003).  
973 Expression of the zinc-finger antiviral protein inhibits alphavirus replication. *J Virol* 77,  
974 11555-11562.  
975
- 976 Biedenkopf, N., Hartlieb, B., Hoenen, T., and Becker, S. (2013). Phosphorylation of Ebola  
977 virus VP30 influences the composition of the viral nucleocapsid complex: impact on viral  
978 transcription and replication. *J Biol Chem* 288, 11165-11174.  
979
- 980 Biedenkopf, N., Schlereth, J., Grunweller, A., Becker, S., and Hartmann, R.K. (2016). RNA  
981 Binding of Ebola Virus VP30 Is Essential for Activating Viral Transcription. *J Virol* 90, 7481-  
982 7496.  
983
- 984 Brubaker, S.W., Gauthier, A.E., Mills, E.W., Ingolia, N.T., and Kagan, J.C. (2014). A bicistronic  
985 MAVS transcript highlights a class of truncated variants in antiviral immunity. *Cell* 156, 800-  
986 811.  
987
- 988 Cadena, C., Ahmad, S., Xavier, A., Willemsen, J., Park, S., Park, J.W., Oh, S-W., Fujita, T., Hou,  
989 F., Binder, M., Hur, S. (2019). Ubiquitin-Dependent and -Independent Roles of E3 Ligase  
990 RIPLET in Innate Immunity. *Cell* 16;177(5):1187-1200.e16.  
991
- 992 Cai, X., Chen, J., Xu, H., Liu, S., Jiang, Q.X., Halfmann, R., and Chen, Z.J. (2014). Prion-like  
993 polymerization underlies signal transduction in antiviral immune defense and  
994 inflammasome activation. *Cell* 156, 1207-1222.  
995
- 996 Cardenas, W.B., Loo, Y.M., Gale, M., Jr., Hartman, A.L., Kimberlin, C.R., Martinez-Sobrido, L.,  
997 Saphire, E.O., and Basler, C.F. (2006). Ebola virus VP35 protein binds double-stranded RNA  
998 and inhibits alpha/beta interferon production induced by RIG-I signaling. *J Virol* 80, 5168-  
999 5178.  
1000
- 1001 Carette, J.E., Raaben, M., Wong, A.C., Herbert, A.S., Obernosterer, G., Mulherkar, N.,  
1002 Kuehne, A.I., Kranzusch, P.J., Griffin, A.M., Ruthel, G., *et al.* (2011). Ebola virus entry requires  
1003 the cholesterol transporter Niemann-Pick C1. *Nature* 477, 340-343.

- 1004 Cauldwell, A.V., Moncorge, O., and Barclay, W.S. (2013). Unstable polymerase-  
1005 nucleoprotein interaction is not responsible for avian influenza virus polymerase restriction  
1006 in human cells. *J Virol* *87*, 1278-1284.  
1007
- 1008 Chandran, K., Sullivan, N.J., Felbor, U., Whelan, S.P., and Cunningham, J.M. (2005).  
1009 Endosomal proteolysis of the Ebola virus glycoprotein is necessary for infection. *Science*  
1010 *308*, 1643-1645.  
1011
- 1012 Chang, T-H., Kubota, T., Matsuoka, M., Jones, S., Bradfute, S.B., Bray, M., Ozato, K. (2009).  
1013 Ebola Zaire virus blocks type I interferon production by exploiting the host SUMOS  
1014 modification machinery. *PLoS Pathog*. Jun;5(6):e1000493.  
1015
- 1016 Charron, G., Li, M.M., MacDonald, M.R., and Hang, H.C. (2013). Prenylome profiling reveals  
1017 S-farnesylation is crucial for membrane targeting and antiviral activity of ZAP long-isoform.  
1018 *Proc Natl Acad Sci U S A* *110*, 11085-11090.  
1019
- 1020 Chiu, H.P., Chiu, H., Yang, C.F., Lee, Y.L., Chiu, F.L., Kuo, H.C., Lin, R.J., and Lin, Y.L. (2018).  
1021 Inhibition of Japanese encephalitis virus infection by the host zinc-finger antiviral protein.  
1022 *PLoS Pathog* *14*, e1007166.  
1023
- 1024 Choudhury, N.R., Heikel, G., Trubitsyna, M., Kubik, P., Nowak, J.S., Webb, S., Granneman, S.,  
1025 Spanos, C., Rappsilber, J., Castello, A., *et al.* (2017). RNA-binding activity of TRIM25 is  
1026 mediated by its PRY/SPRY domain and is required for ubiquitination. *BMC Biol* *15*, 105.  
1027
- 1028 Cote, M., Misasi, J., Ren, T., Bruchez, A., Lee, K., Filone, C.M., Hensley, L., Li, Q., Ory, D.,  
1029 Chandran, K., *et al.* (2011). Small molecule inhibitors reveal Niemann-Pick C1 is essential for  
1030 Ebola virus infection. *Nature* *477*, 344-348.  
1031
- 1032 D'Cruz, A.A., Kershaw, N.J., Chiang, J.J., Wang, M.K., Nicola, N.A., Babon, J.J., Gack, M.U., and  
1033 Nicholson, S.E. (2013). Crystal structure of the TRIM25 B30.2 (PRYSPRY) domain: a key  
1034 component of antiviral signalling. *Biochem J* *456*, 231-240.  
1035
- 1036 Deen, G.F., Broutet, N., Xu, W., Knust, B., Sesay, F.R., McDonald, S.L.R., Ervin, E., Marrinan,  
1037 J.E., Gaillard, P., Habib, N., *et al.* (2017). Ebola RNA Persistence in Semen of Ebola Virus  
1038 Disease Survivors - Final Report. *N Engl J Med* *377*, 1428-1437.  
1039
- 1040 Demaison, C., Parsley, K., Brouns, G., Scherr, M., Battmer, K., Kinnon, C., Grez, M., and  
1041 Thrasher, A.J. (2002). High-level transduction and gene expression in hematopoietic  
1042 repopulating cells using a human immunodeficiency [correction of immunodeficiency] virus  
1043 type 1-based lentiviral vector containing an internal spleen focus forming virus promoter.  
1044 *Hum Gene Ther* *13*, 803-813.  
1045
- 1046 Dutta, M., Robertson, S.J., Okumura, A., Scott, D.P., Chang, J., Weiss, J.M., Sturdevant, G.L.,  
1047 Feldmann, F., Haddock, E., Chiramel, A.I., *et al.* (2017). A Systems Approach Reveals MAVS  
1048 Signaling in Myeloid Cells as Critical for Resistance to Ebola Virus in Murine Models of  
1049 Infection. *Cell Rep* *18*, 816-829.  
1050

- 1051 Escudero-Pérez, B. and Muñoz-Fontela, C. (2019). Role of Type I Interferons on Filovirus  
1052 Pathogenesis. *Vaccines (Basel)* Feb 20;7(1):22.  
1053
- 1054 Ficarelli, M., Wilson, H., Galão, R.P., Mazzon, M., Antzin-Andueta, I., Marsh, M., Neil, S.J.D.,  
1055 Swanson, C.M. (2019). KHNYN is essential for the zinc finger antiviral protein (ZAP) to  
1056 restrict HIV-1 containing clustered CpG dinucleotides. *Elife* Jul 9;8:e46767.  
1057
- 1058 Fletcher, A.J., Mallery, D.L., Watkinson, R.E., Dickson, C.F., and James, L.C. (2015). Sequential  
1059 ubiquitination and deubiquitination enzymes synchronize the dual sensor and effector  
1060 functions of TRIM21. *Proc Natl Acad Sci U S A* 112, 10014-10019.  
1061
- 1062 Fros, J.J., Dietrich, I., Alshaikhahmed, K., Passchier, T.C., Evans, D.J., and Simmonds, P.  
1063 (2017). CpG and UpA dinucleotides in both coding and non-coding regions of echovirus 7  
1064 inhibit replication initiation post-entry. *Elife* 6.  
1065
- 1066 Gack, M.U., Albrecht, R.A., Urano, T., Inn, K.S., Huang, I.C., Carnero, E., Farzan, M., Inoue, S.,  
1067 Jung, J.U., and Garcia-Sastre, A. (2009). Influenza A virus NS1 targets the ubiquitin ligase  
1068 TRIM25 to evade recognition by the host viral RNA sensor RIG-I. *Cell Host Microbe* 5, 439-  
1069 449.
- 1070 Gack, M.U., Shin, Y.C., Joo, C.H., Urano, T., Liang, C., Sun, L., Takeuchi, O., Akira, S., Chen, Z.,  
1071 Inoue, S., *et al.* (2007). TRIM25 RING-finger E3 ubiquitin ligase is essential for RIG-I-mediated  
1072 antiviral activity. *Nature* 446, 916-920.  
1073
- 1074 Gallois-Montbrun, S., Kramer, B., Swanson, C.M., Byers, H., Lynham, S., Ward, M., and  
1075 Malim, M.H. (2007). Antiviral protein APOBEC3G localizes to ribonucleoprotein complexes  
1076 found in P bodies and stress granules. *J Virol* 81, 2165-2178.  
1077
- 1078 Gao, G., Guo, X., and Goff, S.P. (2002). Inhibition of retroviral RNA production by ZAP, a  
1079 CCCH-type zinc finger protein. *Science* 297, 1703-1706.  
1080
- 1081 Geisbert, T.W., Hensley, L.E., Larsen, T., Young, H.A., Reed, D.S., Geisbert, J.B., Scott, D.P.,  
1082 Kagan, E., Jahrling, P.B., and Davis, K.J. (2003a). Pathogenesis of Ebola hemorrhagic fever in  
1083 cynomolgus macaques: evidence that dendritic cells are early and sustained targets of  
1084 infection. *Am J Pathol* 163, 2347-2370.  
1085
- 1086 Geisbert, T.W., Young, H.A., Jahrling, P.B., Davis, K.J., Larsen, T., Kagan, E., and Hensley, L.E.  
1087 (2003b). Pathogenesis of Ebola hemorrhagic fever in primate models: evidence that  
1088 hemorrhage is not a direct effect of virus-induced cytolysis of endothelial cells. *Am J Pathol*  
1089 163, 2371-2382.  
1090
- 1091 Goodier, J.L., Pereira, G.C., Cheung, L.E., Rose, R.J., and Kazazian, H.H., Jr. (2015). The Broad-  
1092 Spectrum Antiviral Protein ZAP Restricts Human Retrotransposition. *PLoS Genet* 11,  
1093 e1005252.  
1094
- 1095 Hayakawa, S., Shiratori, S., Yamato, H., Kameyama, T., Kitatsuji, C., Kashigi, F., Goto, S.,  
1096 Kameoka, S., Fujikura, D., Yamada, T., *et al.* (2011). ZAPS is a potent stimulator of signaling  
1097 mediated by the RNA helicase RIG-I during antiviral responses. *Nat Immunol* 12, 37-44.

- 1098 Hoenen, T., Shabman, R.S., Groseth, A., Herwig, A., Weber, M., Schudt, G., Dolnik, O., Basler,  
1099 C.F., Becker, S., and Feldmann, H. (2012). Inclusion bodies are a site of ebolavirus  
1100 replication. *J Virol* *86*, 11779-11788.  
1101
- 1102 Huang, I.C., Bailey, C.C., Weyer, J.L., Radoshitzky, S.R., Becker, M.M., Chiang, J.J., Brass, A.L.,  
1103 Ahmed, A.A., Chi, X., Dong, L., *et al.* (2011). Distinct patterns of IFITM-mediated restriction  
1104 of filoviruses, SARS coronavirus, and influenza A virus. *PLoS Pathog* *7*, e1001258.  
1105
- 1106 James, L.C. (2014). Intracellular antibody immunity and the cytosolic Fc receptor TRIM21.  
1107 *Curr Top Microbiol Immunol* *382*, 51-66.  
1108
- 1109 Kaletsky, R.L., Francica, J.R., Agrawal-Gamse, C., and Bates, P. (2009). Tetherin-mediated  
1110 restriction of filovirus budding is antagonized by the Ebola glycoprotein. *Proc Natl Acad Sci U*  
1111 *S A* *106*, 2886-2891.  
1112
- 1113 Kane, M., Zang, T.M., Rihn, S.J., Zhang, F., Kueck, T., Alim, M., Schoggins, J., Rice, C.M.,  
1114 Wilson, S.J., and Bieniasz, P.D. (2016). Identification of Interferon-Stimulated Genes with  
1115 Antiretroviral Activity. *Cell Host Microbe* *20*, 392-405.  
1116
- 1117 Kerns, J.A., Emerman, M., and Malik, H.S. (2008). Positive selection and increased antiviral  
1118 activity associated with the PARP-containing isoform of human zinc-finger antiviral protein.  
1119 *PLoS Genet* *4*, e21.  
1120
- 1121 Kirchdoerfer, R.N., Abelson, D.M., Li, S., Wood, M.R., and Saphire, E.O. (2015). Assembly of  
1122 the Ebola Virus Nucleoprotein from a Chaperoned VP35 Complex. *Cell Rep* *12*, 140-149.  
1123
- 1124 Kruse, T., Biedenkopf, N., Hertz, E.P.T., Dietzel, E., Stalman, G., Lopez-Mendez, B., Davey,  
1125 N.E., Nilsson, J., and Becker, S. (2018). The Ebola Virus Nucleoprotein Recruits the Host  
1126 PP2A-B56 Phosphatase to Activate Transcriptional Support Activity of VP30. *Mol Cell* *69*,  
1127 136-145 e136.  
1128
- 1129 Kuroda, M., Halfmann, P.J., Hill-Batorski, L., Ozawa, M., Lopes, T.J.S., Neumann, G.,  
1130 Schoggins, J.W., Rice, C.M., Kawaoka, Y. (2020). Identification of interferon-stimulated genes  
1131 that attenuate EBOV infection. *Nat Commun Jun* *11*;11(1)2953.  
1132
- 1133 Leroy, E.M., Kumulungui, B., Pourrut, X., Rouquet, P., Hassanin, A., Yaba, P., Delicat, A.,  
1134 Paweska, J.T., Gonzalez, J.P., and Swanepoel, R. (2005). Fruit bats as reservoirs of Ebola  
1135 virus. *Nature* *438*, 575-576.  
1136
- 1137 Li, M.M., Lau, Z., Cheung, P., Aguilar, E.G., Schneider, W.M., Bozzacco, L., Molina, H.,  
1138 Buehler, E., Takaoka, A., Rice, C.M., *et al.* (2017). TRIM25 Enhances the Antiviral Action of  
1139 Zinc-Finger Antiviral Protein (ZAP). *PLoS Pathog* *13*, e1006145.  
1140
- 1141 Liu, Y., Gordesky-Gold, B., Leney-Greene, M., Weinbren, N.L., Tudor, M., and Cherry, S.  
1142 (2018). Inflammation-Induced, STING-Dependent Autophagy Restricts Zika Virus Infection in  
1143 the *Drosophila* Brain. *Cell Host Microbe* *24*, 57-68 e53.

- 1144 Long, J., Wright, E., Molesti, E., Temperton, N., and Barclay, W. (2015). Antiviral therapies  
1145 against Ebola and other emerging viral diseases using existing medicines that block virus  
1146 entry. *F1000Res* 4, 30.  
1147
- 1148 Loo, Y.M., and Gale, M., Jr. (2011). Immune signaling by RIG-I-like receptors. *Immunity* 34,  
1149 680-692.  
1150
- 1151 Lopez, L.A., Yang, S.J., Hauser, H., Exline, C.M., Haworth, K.G., Oldenburg, J., and Cannon,  
1152 P.M. (2010). Ebola virus glycoprotein counteracts BST-2/Tetherin restriction in a sequence-  
1153 independent manner that does not require tetherin surface removal. *J Virol* 84, 7243-7255.  
1154
- 1155 Luthra, P., Parameshwaran, R., Mire, C.E., Weisend, C., Tsuda, Y., Yen, B., Liu, G., Leung,  
1156 D.W., Geisbert, T.W., Ebihara, H., *et al.* (2013). Mutual antagonism between the Ebola virus  
1157 VP35 protein and the RIG-I activator PACT determines infection outcome. *Cell Host Microbe*  
1158 Jul 17;14(1):74-84.  
1159
- 1160 Mankouri, J., Fragkoudis, R., Richards, K.H., Wetherill, L.F., Harris, M., Kohl, A., Elliott, R.M.,  
1161 and Macdonald, A. (2010). Optineurin negatively regulates the induction of IFNbeta in  
1162 response to RNA virus infection. *PLoS Pathog* 6, e1000778.  
1163
- 1164 Manokaran, G., Finol, E., Wang, C., Gunaratne, J., Bahl, J., Ong, E.Z., Tan, H.C., Sessions,  
1165 O.M., Ward, A.M., Gubler, D.J., *et al.* (2015). Dengue subgenomic RNA binds TRIM25 to  
1166 inhibit interferon expression for epidemiological fitness. *Science* 350, 217-221.  
1167
- 1168 Martin-Serrano, J., Zang, T., and Bieniasz, P.D. (2001). HIV-1 and Ebola virus encode small  
1169 peptide motifs that recruit Tsg101 to sites of particle assembly to facilitate egress. *Nature*  
1170 *medicine* 7, 1313-1319.  
1171
- 1172 Martin-Vicente, M., Medrano, L.M., Resino, S., Garcia-Sastre, A., and Martinez, I. (2017).  
1173 TRIM25 in the Regulation of the Antiviral Innate Immunity. *Front Immunol* 8, 1187.  
1174
- 1175 McCarthy, S.D.S., Majchrzak-Kita, B., Racine, T., Kozlowski, H.N., Baker, D.P., Hoenen, T.,  
1176 Kobinger, G.P., Fish, E.N., Branch, D.R. (2016). A Rapid Screening Assay Identifies  
1177 Monotherapy with Interferon- $\beta$  and Combination Therapies with Nucleoside Analogs as  
1178 Effective Inhibitors of Ebola Virus. *PLoS Negl Trop Dis* Jan 11;10(1):e0004364.  
1179
- 1180 McNab, F., Mayer-Barber, K., Sher, A., Wack, A., and O'Garra, A. (2015). Type I interferons in  
1181 infectious disease. *Nat Rev Immunol* 15, 87-103.  
1182
- 1183 Messaoudi, I., Amarasinghe, G.K., and Basler, C.F. (2015). Filovirus pathogenesis and  
1184 immune evasion: insights from Ebola virus and Marburg virus. *Nat Rev Microbiol* 13, 663-  
1185 676.  
1186
- 1187 Meyerson, N.R., Zhou, L., Guo, Y.R., Zhao, C., Tao, Y.J., Krug, R.M., and Sawyer, S.L. (2017).  
1188 Nuclear TRIM25 Specifically Targets Influenza Virus Ribonucleoproteins to Block the Onset  
1189 of RNA Chain Elongation. *Cell Host Microbe* 22, 627-638 e627.  
1190

- 1191 Moncorge, O., Long, J.S., Cauldwell, A.V., Zhou, H., Lycett, S.J., and Barclay, W.S. (2013).  
1192 Investigation of influenza virus polymerase activity in pig cells. *J Virol* *87*, 384-394.  
1193
- 1194 Moncorge, O., Mura, M., and Barclay, W.S. (2010). Evidence for avian and human host cell  
1195 factors that affect the activity of influenza virus polymerase. *J Virol* *84*, 9978-9986.  
1196
- 1197 Muhlberger, E. (2007). Filovirus replication and transcription. *Future Virol* *2*, 205-215.  
1198
- 1199 Muller, S., Moller, P., Bick, M.J., Wurr, S., Becker, S., Gunther, S., and Kummerer, B.M.  
1200 (2007). Inhibition of filovirus replication by the zinc finger antiviral protein. *J Virol* *81*, 2391-  
1201 2400.  
1202
- 1203 Neil, S.J., Zang, T., and Bieniasz, P.D. (2008). Tetherin inhibits retrovirus release and is  
1204 antagonized by HIV-1 Vpu. *Nature* *451*, 425-430.  
1205
- 1206 Noda, T., Hagiwara, K., Sagara, H., and Kawaoka, Y. (2010). Characterization of the Ebola  
1207 virus nucleoprotein-RNA complex. *J Gen Virol* *91*, 1478-1483.  
1208
- 1209 Noda, T., Sagara, H., Suzuki, E., Takada, A., Kida, H., and Kawaoka, Y. (2002). Ebola virus  
1210 VP40 drives the formation of virus-like filamentous particles along with GP. *J Virol* *76*, 4855-  
1211 4865.  
1212
- 1213 Odon, V., Fros, J.J., Goonawardane, N., Dietrich, I., Ibrahim, A., Alshaikhahmed, K., Nguyen,  
1214 D., Simmonds, P. (2019). The role of ZAP and OAS3/RNase L pathways in the attenuation of  
1215 an RNA virus with elevated frequencies of CpG and UpA dinucleotides. *Nucleic Acids Res*  
1216 *5*;47(15):8061-8083.  
1217
- 1218 Okamoto, M., Kouwaki, T., Fukushima, Y., and Oshiumi, H. (2017). Regulation of RIG-I  
1219 Activation by K63-Linked Polyubiquitination. *Front Immunol* *8*, 1942.  
1220
- 1221 Okumura, A., Pitha, P.M., and Harty, R.N. (2008). ISG15 inhibits Ebola VP40 VLP budding in  
1222 an L-domain-dependent manner by blocking Nedd4 ligase activity. *Proc Natl Acad Sci U S A*  
1223 *105*, 3974-3979.  
1224
- 1225 Pertel, T., Hausmann, S., Morger, D., Zuger, S., Guerra, J., Lascano, J., Reinhard, C., Santoni,  
1226 F.A., Uchil, P.D., Chatel, L., *et al.* (2011). TRIM5 is an innate immune sensor for the retrovirus  
1227 capsid lattice. *Nature* *472*, 361-365.  
1228
- 1229 Pleschka, S., Jaskunas, R., Engelhardt, O.G., Zurcher, T., Palese, P., and Garcia-Sastre, A.  
1230 (1996). A plasmid-based reverse genetics system for influenza A virus. *J Virol* *70*, 4188-4192.  
1231
- 1232 Prins, K.C., Cardenas, W.B., and Basler, C.F. (2009). Ebola virus protein VP35 impairs the  
1233 function of interferon regulatory factor-activating kinases IKKepsilon and TBK-1. *J Virol* *83*,  
1234 3069-3077.  
1235



- 1236 Sanchez, J.G., Chiang, J.J., Sparrer, K.M.J., Alam, S.L., Chi, M., Roganowicz, M.D., Sankaran,  
1237 B., Gack, M.U., and Pornillos, O. (2016). Mechanism of TRIM25 Catalytic Activation in the  
1238 Antiviral RIG-I Pathway. *Cell Rep* *16*, 1315-1325.  
1239
- 1240 Sanchez, J.G., Okreglicka, K., Chandrasekaran, V., Welker, J.M., Sundquist, W.I., and  
1241 Pornillos, O. (2014). The tripartite motif coiled-coil is an elongated antiparallel hairpin  
1242 dimer. *Proc Natl Acad Sci U S A* *111*, 2494-2499.  
1243
- 1244 Sanchez, J.G., Sparrer, K.M.J., Chiang, C., Reis, R.A., Chiang, J.J., Zurenski, M.A., Wan, Y.,  
1245 Gack, M.U., and Pornillos, O. (2018). TRIM25 Binds RNA to Modulate Cellular Anti-viral  
1246 Defense. *J Mol Biol* *430*, 5280-5293.  
1247
- 1248 Schneider, W.M., Chevillotte, M.D., and Rice, C.M. (2014). Interferon-stimulated genes: a  
1249 complex web of host defenses. *Annu Rev Immunol* *32*, 513-545.  
1250
- 1251 Schoggins, J.W., Wilson, S.J., Panis, M., Murphy, M.Y., Jones, C.T., Bieniasz, P., and Rice, C.M.  
1252 (2011). A diverse range of gene products are effectors of the type I interferon antiviral  
1253 response. *Nature* *472*, 481-485.  
1254
- 1255 Shabman, R.S., Gulcicek, E.E., Stone, K.L., and Basler, C.F. (2011). The Ebola virus VP24  
1256 protein prevents hnRNP C1/C2 binding to karyopherin alpha1 and partially alters its nuclear  
1257 import. *J Infect Dis* *204 Suppl 3*, S904-910.  
1258
- 1259 Su, Z., Wu, C., Shi, L., Luthra, P., Pintilie, G.D., Johnson, B., Porter, J.R., Ge, P., Chen, M., Liu,  
1260 G., *et al.* (2018). Electron Cryo-microscopy Structure of Ebola Virus Nucleoprotein Reveals a  
1261 Mechanism for Nucleocapsid-like Assembly. *Cell* *172*, 966-978 e912.  
1262
- 1263 Subissi, L., Keita, M., Mesfin, S., Rezza, G., Diallo, B., Van Gucht, S., Musa, E.O., Yoti, Z., Keita,  
1264 S., Djingarey, M.H., *et al.* (2018). Ebola Virus Transmission Caused by Persistently Infected  
1265 Survivors of the 2014-2016 Outbreak in West Africa. *J Infect Dis*.  
1266
- 1267 Takata, M.A., Goncalves-Carneiro, D., Zang, T.M., Soll, S.J., York, A., Blanco-Melo, D., and  
1268 Bieniasz, P.D. (2017). CG dinucleotide suppression enables antiviral defence targeting non-  
1269 self RNA. *Nature* *550*, 124-127.  
1270
- 1271 Thorson, A.E., Deen, G.F., Bernstein, K.T., Liu, W.J., Yamba, F., Habib, N., Sesay, F.R., Gaillard,  
1272 P., Massaquoi, T.A., McDonald, S.L.R., *et al.* (2021). Persistence of Ebola virus in semen  
1273 among Ebola virus disease survivors in Sierra Leone: A cohort study of frequency, duration,  
1274 and risk factors. *PLoS Med.* Feb 10;18(2):e1003273.  
1275
- 1276 Tomar, D., and Singh, R. (2015). TRIM family proteins: emerging class of RING E3 ligases as  
1277 regulator of NF-kappaB pathway. *Biol Cell* *107*, 22-40.  
1278
- 1279 Treier, M., Staszewski, L.M., and Bohmann, D. (1994). Ubiquitin-dependent c-Jun  
1280 degradation in vivo is mediated by the delta domain. *Cell* *78*, 787-798.  
1281

1282 Tscherne, D.M., and Garcia-Sastre, A. (2011). An enzymatic assay for detection of viral entry.  
1283 *Curr Protoc Cell Biol Chapter 26*, Unit 26 12.  
1284  
1285 Vetter, P., Fischer, W.A., 2<sup>nd</sup>, Schibler, M., Jacobs, M., Bausch, D.G., and Kaiser, L. (2016).  
1286 Ebola Virus Shedding and Transmission: Review of Current Evidence. *J Infect Dis* **214**, S177-  
1287 S184.  
1288 Wan, W., Kolesnikova, L., Clarke, M., Koehler, A., Noda, T., Becker, S., and Briggs, J.A.G.  
1289 (2017). Structure and assembly of the Ebola virus nucleocapsid. *Nature* **551**, 394-397.  
1290  
1291 Watt, A., Moukambi, F., Banadyga, L., Groseth, A., Callison, J., Herwig, A., Ebihara, H.,  
1292 Feldmann, H., and Hoenen, T. (2014). A novel life cycle modeling system for Ebola virus  
1293 shows a genome length-dependent role of VP24 in virus infectivity. *J Virol* **88**, 10511-10524.  
1294  
1295 Zhang, A.P., Bornholdt, Z.A., Liu, T., Abelson, D.M., Lee, D.E., Li, S., Woods, V.L., Jr., and  
1296 Sapphire, E.O. (2012). The ebola virus interferon antagonist VP24 directly binds STAT1 and  
1297 has a novel, pyramidal fold. *PLoS Pathog* **8**, e1002550.  
1298  
1299 Zhao, Y., Sun, X., Nie, X., Sun, L., Tang, T.S., Chen, D., and Sun, Q. (2012). COX5B regulates  
1300 MAVS-mediated antiviral signaling through interaction with ATG5 and repressing ROS  
1301 production. *PLoS Pathog* **8**, e1003086.  
1302  
1303 Zheng, X., Wang, X., Tu, F., Wang, Q., Fan, Z., and Gao, G. (2017). TRIM25 Is Required for the  
1304 Antiviral Activity of Zinc Finger Antiviral Protein. *J Virol* **91**.  
1305  
1306  
1307  
1308

1309 **Figure Legends**

1310 **Figure 1.** Human ISG-expression screening identifies novel candidates with antiviral activity against  
1311 EBOV trVLP.

1312 **(A)** EBOV trVLP normalized reporter activity on HEK293T- and U87-MG-stably expressing TIM1  
1313 transfected with EBOV RNP proteins and pre-treated with increasing amounts of IFN-I 24 hours prior  
1314 infection (p1 target cells, blue). Supernatants from p1 cells were harvested 24 hpi, and used to infect  
1315 HEK293T-TIM1 cells and reporter activities measured 24 hours later (p2 target cells, red).

1316 **(B)** HEK293T-TIM1 cells were pre-treated with IFN-I (1000U/ml) prior to transduction with BlaVP40-  
1317 EBOV-GP virus-like particles. 24 hours later, viral particle entry was measured as percentage of cells  
1318 presenting cleavage of CCF2-AM dye by flow cytometry.

1319 **(C)** Relative quantification of intracellular viral RNA levels on HEK293T-TIM1 (grey) and U87-MG-  
1320 TIM1 (blue) p1 target cells pre-treated with IFN-I, and infected with EBOV trVLPs as in (A). Random  
1321 hexamer primers were used to generate cDNAs and RT-qPCR analysis was performed using qPCR  
1322 primers/probe sets targeting the 5'-trailer region of the trVLP 4cis minigenome (vRNA and cRNA, left  
1323 panel), VP40 RNA (vRNA, cRNA and mRNA, right panel) or *gapdh* as endogenous control. Data  
1324 presented as fold change compared to control (no IFN) based on  $\Delta\Delta C_t$  values.

1325 **(D)** Relative quantification of viral transcripts present on supernatants from (C). cDNA synthesis  
1326 performed as above and RT-qPCR performed with primers/probe set targeting EBOV VP40 RNA.  
1327 Data shown as fold change compared to control (no IFN) based on absolute copy numbers.

1328 **(E)** Results of the arrayed human ISG screen. HEK293T-TIM1 target cells (p1) were pre-transfected  
1329 with plasmids expressing individual ISGs together with EBOV RNP components and Firefly  
1330 transfection control, and infected with EBOV trVLPs 24 hours later. Supernatants from p1 cells were  
1331 harvested 24 hpi and used to infect p2 target cells pre-transfected solely with vRNP components and  
1332 pFluc. EBOV trVLP reporter activities for p1 (blue dots) and p2 target cells (red dots) were measured  
1333 as in (A). Each dot represents one ISG. Infectivity measured for each ISG-expressing well was  
1334 normalized to the activity of Fluc control within the well, and values are represented as percentage of  
1335 the screen plate average, which is indicated as log of 100%.

1336 **(F)** Confirmatory assays for selected top candidate inhibitory ISGs. EBOV-trVLP infection was  
1337 performed on HEK293T-TIM1 cells as in the primary screen. Normalized reporter activities for p1

1338 (upper panels) and p2 target cells (lower panels) are represented as percentage of EBOV trVLP  
1339 replication on cells transfected with GFP (white bars).

1340 **(G)** Relative quantification of intracellular (left and middle panels) and supernatant (right panel) viral  
1341 RNA levels on HEK293T-TIM1 target cells (p1) transfected with EBOV RNP components and the top  
1342 inhibitory ISG candidates and infected as before. cDNA synthesis and RT-qPCR analysis performed  
1343 as in (C) and (D).

1344 All the represented EBOV trVLP RLuc reporter activities are normalized to control Fluc values  
1345 obtained in the same lysates. Universal Type I IFN- $\alpha$  was used to pre-treat cells in panels (A-D). \*p >  
1346 0.05, \*\*p > 0.01 and \*\*\*p > 0.001 as determined by two-tailed paired t-test. All error bars represent  $\pm$   
1347 SEM of at least three independent experiments.

1348

1349 **Figure 2.** TRIM25 is required for type-I IFN-mediated restriction of EBOV trVLP replication.

1350 **(A)** EBOV trVLP normalized reporter activity on HEK293T-TIM1 cells transfected with EBOV RNP  
1351 proteins and either GFP (grey) or TRIM25 (blue) prior to infection with increasing amounts of EBOV  
1352 trVLPs (p1 target cells, left panel). Supernatants from p1 cells were harvested 24 hpi and used to  
1353 infect p2 target cells (right panel), and reporter activities measured 24 hours later.

1354 **(B)** HEK293T-TIM1 cells were transfected with plasmids expressing either GFP (grey) or TRIM25  
1355 (blue), and transduced with BlaVP40-EBOV-GP virus like particles 24 hours later. Viral particle entry  
1356 was determined 24 hours post-transduction by measuring the percentage of cells with cleaved CCF2-  
1357 AM dye by flow cytometry.

1358 **(C)** Quantification of viral RNA transcripts present on cell lysates (left panel) and supernatants (right  
1359 panel) of HEK293T-TIM1 cells transfected and infected as in (A). Strand-specific reverse transcription  
1360 primers were used on total RNA extracted from cells to generate cDNAs for minigenomic RNA  
1361 (vRNA), complementary RNA (cRNA), and mRNA, which were subsequently analysed by RT-qPCR.  
1362 Random hexamer primers were used to generate cDNAs from total viral RNA extracted from  
1363 supernatants, and qPCR analysis performed using primers/probe sets targeting 5' trailer region of the  
1364 4cis genome or VP40 RNA.

1365 **(D)** U87-MG- and HEK293T-based CRISPR cells lines were treated with increasing amounts of IFN-I,  
1366 and lysed 24 hours later for analysis. Protein levels of HSP90 and TRIM25 were determined by  
1367 western blot on LacZ CRISPR control cells and corresponding TRIM25 CRISPR KO cell lines.

1368 **(E)** EBOV trVLP reporter activities on U87-MG LacZ CRISPR-TIM1 (grey) and U87-MG TRIM25  
1369 CRISPR KO-TIM1 (blue) target cells (p1) transfected with EBOV RNP proteins, and pre-treated with  
1370 increasing amounts of IFN-I prior to infection.

1371 **(F)** Relative quantification of intracellular and supernatant trVLP RNA levels on U87-MG LacZ  
1372 CRISPR-TIM1 (grey) and U87-MG TRIM25 CRISPR KO-TIM1 cells (blue) from (E). Random hexamer  
1373 primers were used to generate cDNAs and RT-qPCR analysis was performed using primers/probe  
1374 sets targeting trVLP 4cis genome trailer region (vRNA and cRNA, left panel), or VP40 RNA  
1375 (intracellular vRNA, cRNA and mRNA, middle panel; minigenomic RNA in the supernatant, right  
1376 panel). Data shown as fold change compared to control (no IFN) based on absolute copy numbers.

1377 **(G)** EBOV trVLP reporter activities on U87-MG LacZ CRISPR-TIM1 (solid lines) and U87-MG TRIM25  
1378 CRISPR KO-TIM1 (dashed lines) target cells transfected with EBOV RNP proteins and pre-treated  
1379 with increasing amounts of IFN- $\alpha$ 2a (blue) or IFN- $\beta$ 1b (red) prior to infection.

1380 **(H)** U87-MG LacZ CRISPR (grey) and U87-MG TRIM25 CRISPR KO cells (blue) were treated with  
1381 increasing amounts of IFN-I, and transduced the following day with a VSV-G pseudo-typed lentiviral  
1382 vector expressing GFP (CSGW). The percentage of GFP-positive cells was determined 24 hours later  
1383 by flow cytometry.

1384 **(I)** HEK293T LacZ CRISPR (grey) and HEK293T TRIM25 CRISPR KO (blue) were used as producer  
1385 cells (p0) of EBOV trVLPs and reporter activities measured 48 hours post-transfection. Supernatants  
1386 from p0 cells were used to infect HEK293T-TIM1 target cells (p1), and reporter activities determined  
1387 24 hours later.

1388 All the represented EBOV trVLP RLuc reporter activities are normalized to control FLuc values  
1389 obtained in the same lysates. \*p > 0.05, \*\*p > 0.01 and \*\*\*p > 0.001 as determined by two-tailed  
1390 paired t-test. All error bars represent  $\pm$  SEM of at least three independent experiments.

1391

1392 **Figure 3.** TRIM25 antiviral effect against EBOV trVLPs is independent of RIG-I and downstream pro-  
1393 inflammatory signal transduction.

1394 **(A, B, H)** U87-MG- and/or HEK293T-based CRISPR cells lines were treated with increasing amounts  
1395 of IFN-I, and lysed 24 hours later for protein analysis. Protein levels of HSP90 (A, B and H), RIG-I (A),  
1396 FL-MAVS/mini-MAVS (B) and TBK1 (H) were determined by western blot on LacZ CRISPR control  
1397 cells and corresponding CRISPR knock-out (KO) cells lines.

1398 **(C, I)** HEK293T-based CRISPR cell lines depicted in the figures were transfected with plasmids  
1399 expressing EBOV RNP proteins and TIM-1 together with either GFP (grey bars) or TRIM25 (blue  
1400 bars), and later infected with a fixed amount of EBOV trVLPs. 24 hpi cells were lysed and trVLP  
1401 reporter activities measured.

1402 **(D)** EBOV trVLP reporter activities on U87-MG LacZ CRISPR (grey) and U87-MG RIG-I CRISPR KO  
1403 (blue) target cells (p1), transfected with TIM-1 and EBOV RNP proteins, and pre-treated overnight  
1404 with increasing amounts of IFN-I prior to infection. Luciferase activities measured 24 hours post-  
1405 infection.

1406 **(E)** EBOV trVLP reporter activities on U87-MG LacZ CRISPR (grey), U87-MG FL-MAVS KO (blue)  
1407 and FL-MAVS/miniMAVS CRISPR DKO (red) target cells (p1), transfected with TIM-1 and EBOV  
1408 RNP proteins, and pre-treated overnight with increasing amounts of IFN-I prior to infection. Luciferase  
1409 activities measured 24 hours post-infection.

1410 **(F)** Protein levels of HSP90 and MAVS determined by western blot lysates from HEK293T LacZ  
1411 control cells, and HEK293T-MAVS DKO cells lines engineered to stably express CRISPR-resistant  
1412 variants of both MAVS isoforms (MAVS<sup>CR</sup>), miniMAVS (M1A<sup>CR</sup>) or FL-MAVS (M142A<sup>CR</sup>).

1413 **(G)** HEK293T LacZ CRISPR and engineered HEK293T-MAVS DKO cell lines from (F) were co-  
1414 transfected with plasmids expressing EBOV RNP components and TIM-1 together with either GFP  
1415 (grey bars) or TRIM25 (blue bars), and later infected with EBOV trVLPs. Reporter activities were  
1416 measured 24 hours later.

1417 **(J)** U87-MG LacZ CRISPR and U87-MG TBK1 CRISPR KO cells were transfected with RNP proteins  
1418 and TIM-1, followed by a IFN-I pre-treatment prior to infection with a fixed amount of EBOV trVLPs.  
1419 EBOV trVLP reporter activities in p1 were measured 24 hours after infection.

1420 **(K)** Fold activation of a firefly luciferase NF-kB reporter in the depicted HEK293T-based CRISPR cells  
1421 lines transiently transfected with TRIM25 compared to control GFP vector. Cells were harvested 48  
1422 hours post-transfection and FLuc reporter values normalised to control Renilla luciferase activity in the  
1423 same lysates.

1424 All the represented EBOV trVLP Renilla reporter activities are normalized to control Firefly luciferase  
1425 values obtained in the same lysates. \*p > 0.05, \*\*p > 0.01 and \*\*\*p > 0.001 as determined by two-  
1426 tailed paired t-test. All error bars represent  $\pm$  SEM of at least three independent experiments.

1427

1428

1429 **Figure 4.** TRIM25 and ZAP are inter-dependent for their antiviral activity against EBOV trVLP.

1430 **(A)** EBOV trVLP normalized reporter activity on HEK293T-TIM1 cells transfected with EBOV RNP  
1431 proteins and either GFP (grey) or ZAP-L (red) prior to infection with increasing amounts of EBOV  
1432 trVLPs (p1 target cells, left panel). Supernatants from p1 cells were harvested and used to infect p2  
1433 target cells (right panel), and reporter activities measured 24 hours later.

1434 **(B)** HEK293T- and U87-MG-based CRISPR cells lines were treated with increasing amounts of IFN-I,  
1435 and lysed 24 hours later for analysis. Protein levels of HSP90 and ZAP were determined by western  
1436 blot on LacZ CRISPR control cells and corresponding ZAP CRISPR KO cell lines.

1437 **(C)** EBOV trVLP reporter activities on U87-MG LacZ CRISPR-TIM1 (grey) and U87-MG ZAP CRISPR  
1438 KO-TIM1 (red) target cells (p1), transfect with RNP proteins and pre-treated with increasing amounts  
1439 of IFN-I prior to infection. Reporter activities measured 24 hours after infection.

1440 **(D)** Quantification of intracellular and supernatant viral RNA levels on U87-MG LacZ CRISPR-TIM1  
1441 (grey) and U87-MG ZAP CRISPR KO-TIM1 target cells (red) that were transfected with EBOV RNP  
1442 proteins and pre-treated with IFN-I, prior to infection with EBOV trVLPs as in (C). Random hexamer  
1443 primers were used to generate cDNAs and RT-qPCR analysis was performed using primers/probe  
1444 sets targeting either the trailer region of the viral genome (vRNA and cRNA, left panel), or VP40 RNA  
1445 (intracellular vRNA, cRNA and mRNA, middle panel; minigenomic RNA in the supernatant, right  
1446 panel). Data presented as fold change compared to control (no IFN) based on absolute copy  
1447 numbers.

1448 **(E)** EBOV trVLP normalized reporter activities on HEK293T LacZ CRISPR, HEK293T TRIM25  
1449 CRISPR KO and HEK293T ZAP CRISPR KO cells stably expressing TIM1, that were transfected with  
1450 EBOV RNP plasmids together with GFP (grey), ZAP L (red) or TRIM25 (blue), prior to infection with a  
1451 fixed amount of EBOV trVLPs (p1 target cells). Supernatants from p1 were then harvested and used  
1452 to infect HEK293T-TIM1 cells (p2 target cells).

1453 **(F)** Relative quantification of EBOV L-Polymerase RNA transcripts on cell lysates of HEK293T LacZ  
1454 CRISPR-TIM1 and HEK293T TRIM25 CRISPR KO-TIM1 cells transfected EBOV RNP plasmids in  
1455 combination with either with GFP (grey) or ZAP-L (red), and infected with a fixed amount of EBOV  
1456 trVLPs. Random hexamer primers were used to generate cDNAs from total RNA, and RT-qPCR  
1457 analysis performed using a primers/probe sets targeting EBOV L-polymerase and *gapdh*. Data

1458 normalized to L-polymerase RNA levels on HEK293T LacZ CRISPR-TIM1 cells transfected with GFP  
1459 based on  $\Delta\Delta C_t$  values.

1460 **(G)** EBOV trVLP normalized reporter activity on p2 target cells. HEK293T-TIM1 p1 cells were  
1461 transfected with EBOV RNP proteins, and either GFP (grey) or ZAP-L (red) prior to infection with  
1462 increasing amounts of wild-type EBOV trVLPs (trVLPwt, solid lines) or a variant with no CpG  
1463 dinucleotides on the *Renilla* ORF of the 4cis genome (CpG low, dashed lines). Supernatants from p1  
1464 were harvested and used to infect HEK293T-TIM1 p2 target cells.

1465 **(H)** Quantification of viral RNA transcripts present intracellularly (upper and middle panels) and in  
1466 supernatants (lower panel) of 293T-TIM1 cells transfected as in (G), and infected with a fixed amount  
1467 of EBOV trVLP WT or CpG low. Random hexamer primers were used to generate cDNAs from total  
1468 RNA and RT-qPCR analysis was performed as in (D).

1469 **(I)** EBOV trVLP normalized reporter activity on HEK293T-TIM1 p2 target cells. HEK293T LacZ  
1470 CRISPR-TIM1 (grey) and HEK293T ZAP CRISPR KO-TIM1 cells (red) were transfected with EBOV  
1471 RNP proteins and pre-treated with increasing amounts of IFN-I prior to infection with wild-type EBOV  
1472 trVLPs (solid lines) or CpG Low EBOV trVLP (dashed lines). Supernatants from p1 were harvested  
1473 and used to infect HEK293T-TIM1 p2 target cells. Reporter activities measured 24 hours post-  
1474 infection.

1475 All the represented EBOV trVLP *Renilla* reporter activities are normalized to control Firefly luciferase  
1476 values obtained in the same lysates.  $P > 0.05$ ,  $**p > 0.01$  and  $***p > 0.001$  as determined by two-  
1477 tailed paired t-test. All error bars represent  $\pm$  SEM of at least three independent experiments.

1478

1479 **Figure 5.** TRIM25 interacts with EBOV NP and promotes its ubiquitination.

1480 **(A)** Lysates of HEK293T-TIM1 cells transfected either with GFP or TRIM25, in combination with  
1481 EBOV NP and/or EBOV VP35, were immunoprecipitated with an anti-TRIM25 antibody. Cellular  
1482 lysates and pull-downs were analysed by western blot for HSP90, TRIM25, EBOV NP and VP35.

1483 **(B)** Panels show representative fields for the localization of EBOV NP and endogenous TRIM25 on  
1484 HEK293T-TIM1 cells left untreated (Null), or transfected with EBOV NP protein alone, or in  
1485 combination either with VP35 or all remaining RNP proteins (VP35, VP30 and L). Cells were stained  
1486 with anti-TRIM25 (red) and anti-NP (green) antibodies, as well as with DAPI (blue). White arrows  
1487 point to the localization of TRIM25 intracellular aggregates.



1488 **(C)** Schematic representation of functional domains within TRIM25 (upper panel). Lysates of  
1489 HEK293T-TIM1 cells transfected with EBOV NP in combination with GFP, TRIM25 or mutants  
1490 thereof, were immunoprecipitated with an anti-TRIM25 antibody. Input and pull-down samples were  
1491 blotted for HSP90, TRIM25 and EBOV NP (lower panel). (\*) indicates the detected heavy-chains (HC)  
1492 from the antibody used in the pull-down.

1493 **(D)** EBOV trVLP normalized reporter activity on HEK293T-TIM1 cells transfected with EBOV RNP  
1494 proteins in combination with GFP (grey), TRIM25 wild-type (blue), TRIM25  $\Delta$ RING (red) or TRIM25  
1495  $\Delta$ SPRY (orange) mutants, prior to infection with increasing amounts of EBOV trVLPs (p1 target cells).  
1496 EBOV trVLP Rluc reporter activities were measure 24 hpi and normalized to control Fluc values  
1497 obtained in the same lysates. EBOV trVLP Renilla reporter activities are normalized to control Firefly  
1498 luciferase values obtained in the same lysates. \*p > 0.05, \*\*p > 0.01 and \*\*\*p > 0.001 as determined  
1499 by two-tailed paired t-test. All error bars represent  $\pm$  SEM of at least three independent experiments.

1500 **(E)** HEK293T-TIM1 cells were transfected either with GFP or TRIM25, in combination with EBOV NP  
1501 and/or a plasmid expressing a HA-tagged Ubiquitin (HA-Ub). Lysates from these cells were  
1502 immunoprecipitated with an anti-HA antibody (left panels) or an anti-NP antibody (right panels).  
1503 Cellular lysates and pull-down samples were analysed by western blot for HSP90, TRIM25, EBOV NP  
1504 and HA (ubiquitin).

1505 **(F)** Lysates from HEK293T cells co-transfected with EBOV NP and YFP or TRIM25 were  
1506 immunoprecipitated with an anti-NP antibody, and pulled-down fractions treated with USP2  
1507 deubiquitinase enzyme. Cellular lysates and pull-downs were analysed by western blot for HSP90,  
1508 TRIM25 and EBOV NP.

1509

1510 **Figure 6.** Determinants of TRIM25 antiviral activity and NP interaction

1511 **(A)** Upper Panel: schematic representation of TRIM25 with the localization of the RING dimerization  
1512 mutants (light blue), E3-Ligase catalytic mutants (pink), Bbox2 & coiled-coil mutants (orange) and  
1513 SPRY-domain and RNA-binding mutants (light green) generated on a TRIM25 CRISPR-resistant  
1514 background. Lower Panel: EBOV trVLP normalized reporter activity on HEK293T TRIM25 CRISPR  
1515 KO-TIM1 cells transfected with EBOV RNP proteins in combination with GFP (grey), CRISPR-  
1516 resistant (CR) TRIM25 wild-type (dark blue), or mutants thereof (see upper panel), prior to infection  
1517 with EBOV trVLPs (p1 target cells). EBOV trVLP Rluc reporter activities were measure 24 hpi and

1518 normalized to control Fluc values obtained in the same lysates. All error bars represent  $\pm$  SEM of four  
1519 independent experiments. \* $p > 0.05$ , \*\* $p > 0.01$  and \*\*\* $p > 0.001$  as determined by Oneway-ANOVA.  
1520 Statistics represented above graphic bars were calculated as multiple comparisons to TRIM25 wild-  
1521 type, while the statistics within graphic bars are represented in function of multiple comparison to  
1522 YFP.

1523 (B) HEK293T TRIM25 CRISPR KO cells were transfected with plasmids expressing the EBOV RNP  
1524 proteins together with YFP, CRISPR-resistant TRIM25 or mutants thereof. Cell lysates were analysed  
1525 48 hours later by western blot for the expression of HSP90, TRIM25 and EBOV NP.

1526 (C) Lysates of HEK293T cells transfected with EBOV NP in combination with either YFP or CRISPR-  
1527 resistant TRIM25 (or mutants thereof) were immunoprecipitated with a rabbit anti-TRIM25 antibody.  
1528 Cellular lysates and pull-down samples were analysed by western blot for HSP90, TRIM25 and EBOV  
1529 NP.

1530

1531 **Figure 7.** TRIM25 and ZAP promote the dissociation of EBOV trVLP genomic RNA from the viral  
1532 ribonucleoprotein.

1533 (A) Typical confocal microscopy fields from HEK293T LacZ CRISPR-TIM1 (left panels) or HEK293T  
1534 NPC1 CRISPR KO-TIM1 cells (right panels) left untreated (Null) or infected with EBOV trVLPs  
1535 concentrated on a 20% sucrose-cushion. Cells were stained 4 to 6 hours post-infection with anti-  
1536 TRIM25 (red), anti-EBOV NP (green) and DAPI (blue). White arrows show localization of TRIM25  
1537 intracellular aggregates.

1538 (B) Relative quantification of intracellular RNA levels (grey) and NP-associated RNA (blue) on  
1539 HEK293T LacZ CRISPR-TIM1 and HEK293T NPC1 CRISPR KO-TIM1 cells transfected with GFP,  
1540 TRIM25 or ZAP-L prior to infection with EBOV trVLPs. 3 hours post-infection cells were UV cross-  
1541 linked, and EBOV NP from incoming virions was immunoprecipitated from lysates with an anti-NP  
1542 antibody. Following proteinase K treatment, pulled-down RNA was extracted with Qiazol / chloroform,  
1543 and random hexamer primers were used to generate cDNAs, and RT-qPCR analysis performed using  
1544 a primers/probe set targeting EBOV VP40 RNA. Values are presented as percentage of absolute  
1545 RNA copy numbers on cells transfected with GFP.

1546 (C) HEK293T LacZ CRISPR, HEK293T ZAP CRISPR KO and HEK293T TRIM25 CRISPR KO cells  
1547 stably expressing TIM1 were transfected with GFP, TRIM25 or ZAP-L as depicted in the panels, and

1548 later infected with EBOV trVLPs. Relative quantification of intracellular viral RNA levels (grey) and  
1549 NP-associated RNA (coloured bars) were determined as in (B).

1550 **(D)** HEK293T-TIM1 cells were transfected with GFP, wild-type TRIM25 or mutants thereof prior to  
1551 infection with EBOV trVLPs. Relative quantification of intracellular viral RNA levels (grey) and NP-  
1552 associated RNA (blue) were determined as in (B).

1553 **(E)** HEK293T TRIM25 CRISPR KO-TIM1 cells were transfected with GFP (grey), or CRISPR-resistant  
1554 versions of TRIM25 (wild-type, dark blue; or mutants thereof, as depicted in the figure, light blue) prior  
1555 to infection with EBOV trVLPs. Relative quantification of NP-associated RNA was determined as in  
1556 (B).

1557 **(F)** Prior to infection with EBOV trVLPs, HEK293T LacZ CRISPR-TIM1 cells were transfected with  
1558 GFP or TRIM25 and either treated with 250µM of T705 (Favipiravir), or the equivalent volume of the  
1559 diluent (DMSO). Relative quantification of intracellular viral RNA levels (grey) and NP-associated RNA  
1560 (coloured bars) were determined as in (B). Values are presented as percentage of absolute RNA copy  
1561 numbers on cells transfected with GFP.

1562 **(G)** Relative quantification of ZAP-associated RNA on HEK293T LacZ CRISPR-TIM1 and HEK293T  
1563 TRIM25 CRISPR KO-TIM1 cells transfected with GFP (grey) or ZAP-L (red) prior to infection with  
1564 EBOV trVLPs. 3 hours post-infection cells were UV cross-linked, and ZAP was immunoprecipitated  
1565 from lysates. RNA extraction, cDNA synthesis and RT-qPCR analysis were performed as in (B).  
1566 Values were normalized to the respective inputs and are presented relative to absolute RNA copy  
1567 numbers on cells transfected with GFP.

1568 **(H)** HEK293T LacZ CRISPR, HEK293T TRIM25 CRISPR KO and HEK293T ZAP CRISPR KO cells  
1569 stably expressing TIM1 were either untreated or pre-treated with 1000U/ml of IFN-I prior to infection  
1570 with EBOV trVLPs. Relative quantification of intracellular viral RNA levels (grey) and NP-associated  
1571 RNA (coloured bars) were determined as in (B). Values are presented as percentage of absolute RNA  
1572 copy numbers on cells non-treated with IFN.

1573 **(I)** HEK293T LacZ CRISPR, HEK293T TRIM25 CRISPR and HEK293T ZAP CRISPR KO cells stably  
1574 expressing TIM1 were pre-treated overnight with increasing concentrations of IFN-I prior to infection  
1575 with EBOV nanoluciferase trVLPs. EBOV trVLP nanoluc reporter activities were measured 48 hpi and  
1576 data is shown as a percentage of untreated for each cell line individually.

1577 **(J)**. Proposed model for the mechanism associated with the antiviral activities of TRIM25 and ZAP  
1578 against EBOV trVLP. EBOV viral particle enters the cells by macropinocytosis, followed by NPC1-  
1579 dependent fusion with the cellular endosomal membrane. Once in the cytoplasm, TRIM25 is recruited  
1580 to the viral particle through an interaction with EBOV NP protein, leading to the ubiquitination of both  
1581 viral target and TRIM25 itself. This results in the displacement of the viral RNA genome from the  
1582 vRNP, followed by its recognition by ZAP in a way dependent of the genome's CpG content and  
1583 subsequent impact in the transcription and replication of EBOV trVLP.

1584

1585

1586

1587 **Supplemental Figure Legends**

1588 **Supplemental Figure S1 (related to Figure 1).** EBOV trVLP assay and characterization of top  
1589 candidate inhibitory ISGs.

1590 **(A)** Upper panels: Graphical representations of the Ebola virus genome, and of the tetra-cistronic  
1591 minigenome (4cis) encoding Renilla luciferase (*Rluc*) used in the transcription- and replication-  
1592 competent (trVLP) assay. Lower panel: Schematic representation of the EBOV trVLP assay. Plasmids  
1593 expressing ISGs of interest were co-transfected with viral RNP proteins into p1 target cells.  
1594 Alternatively, p1 target cells were pre-treated with IFN-I prior infection with EBOV trVLPs (detailed  
1595 description on Methods).

1596 **(B)** U87-MG-Tim1 cells were transfected with plasmids expressing EBOV's RNP components and  
1597 pre-treated with increasing amounts of Universal type-I IFN- $\alpha$ , IFN- $\alpha$ 2a or IFN- $\beta$ 1a, 16-24 hours prior  
1598 to EBOV trVLP infection. Reporter activities were measured 24 hours later.

1599 **(C)** U87-MG-TIM1 and HEK293T-TIM1 cells were transfected with plasmids expressing EBOV NP,  
1600 VP35, VP30 and a HA-tagged version of L-polymerase, before being treated with increasing amounts  
1601 of IFN-I prior to EBOV trVLP infection as in Figure 1A. Cells were lysed 24 hours post-transfection  
1602 and lysates analysed by western blot for the expression of the EBOV RNP proteins and HSP90.

1603 **(D)** ISG Screen Validation. Normal distribution of EBOV trVLP Rluc values in the presence of  
1604 individually over-expressed ISGs on p1 (left panel, blue dots) and p2 (right panel, red dots) target  
1605 cells, normalized to Fluc levels on the same well. The number (n) of ISGs within standard deviation  
1606 (s.d. or z score) ranges is shown in the boxes.

1607 **(E)** HEK293T-TIM1 cells were transfected with plasmids expressing the EBOV RNP proteins together  
1608 with selected ISGs. Cells lysates were analysed 48 hours later by western blot as in (C).

1609 **(F)** HEK293T-TIM1 cells were transfected with individual ISGs and EBOV RNP-expressing plasmids  
1610 as in (E), and tested for cellular viability 48 hours later using Cell-Titer Glo luminescence-based assay  
1611 (Promega). As positive control for toxicity (red bar), cells were treated for 48h with a concentration of  
1612 MG132 (25 $\mu$ M) sufficient to reduce in 50 percent the ATP levels in the supernatant. Values are  
1613 represented as percentage of luminescence obtained in control wells transfected with GFP (grey bar),  
1614 and toxicity cut-off represented as a dashed line.

1615 **(G)** Fold activation of Firefly luciferase NF-kB, ISG56/IFIT1 or ISRE reporters (top, middle or bottom  
1616 panels, respectively) in HEK293T cells transiently transfected with selected individual ISGs compared

1617 to control GFP vector. Cells were harvested either 24 hours (blue) or 48 hours (grey) post-  
1618 transfection.

1619

1620 **Supplemental Figure S2 (related to Figure 4).** Overexpression of ZAP-L impacts on EBOV trVLP  
1621 viral RNA levels

1622 **(A)** Quantification of viral RNA transcripts present intracellularly (left panel) and in supernatants (right  
1623 panel) of HEK293T-TIM1 cells transfected as in Figure 4A, and infected with a fixed amount of EBOV  
1624 trVLPs. Strand-specific reverse transcription primers were used on total RNA extracted from cells to  
1625 generate cDNAs for minigenomic RNA (vRNA), complementary RNA (cRNA), and mRNA, followed by  
1626 RT-qPCR analysis. Random hexamer primers were used to generate cDNAs from total RNA  
1627 extracted from supernatants, and qPCR analysis performed using primers targeting the 5' trailer  
1628 region of the 4cis minigenome or VP40 RNA.

1629 **(B)** EBOV trVLP reporter activities on U87-MG LacZ CRISPR-TIM1 (solid lines) and U87-MG ZAP  
1630 CRISPR KO-TIM1 (dashed lines) target cells transfected with EBOV RNP proteins and pre-treated  
1631 with increasing amounts of IFN- $\alpha$ 2a (blue) or IFN- $\beta$ 1b (red) prior to infection.

1632 **(C)** HEK293T LacZ CRISPR (grey) and HEK293T ZAP CRISPR KO (red) were used as producer  
1633 cells (p0) for EBOV trVLPs, and reporter activities measured 48 hours post-transfection. Supernatants  
1634 from p0 were used to infect HEK293T-TIM1 target cells (p1), and reporter activities determined 24  
1635 hours later.

1636 **(D)** Influenza A minigenome assay was performed in HEK293T LacZ CRISPR (grey), HEK293T ZAP  
1637 CRISPR KO (red) and HEK293T RIG-I CRISPR KO (blue) cells transfected with Influenza polymerase  
1638 components (NP, PB1, PB2 and PA) and increasing amounts of TRIM25. Normalized Fluc values are  
1639 presented as percentage relative to a GFP control in each cell line.

1640 **(E)** HEK293T LacZ CRISPR, and HEK293T TRIM25 CRISPR KO cells were transfected with  
1641 plasmids expressing the EBOV NP, VP35, VP30 proteins and a HA-tagged L Polymerase together  
1642 with either pcDNA4 or ZAP-L. Cells lysates were analysed 48 hours later by western blot for the  
1643 expression of HSP90, TRIM25, ZAP and the EBOV RNP complex proteins.

1644 **(F)** Relative quantification of intracellular viral RNA transcripts on cell lysates of HEK293T LacZ  
1645 CRISPR-TIM1 and HEK293T TRIM25 CRISPR KO-TIM1 cells transfected EBOV RNP plasmids in  
1646 combination with either with GFP (grey) or ZAP-L (red), and infected with a fixed amount of EBOV

1647 trVLPs. Random hexamer primers were used to generate cDNAs from total RNA, and RT-qPCR  
1648 analysis performed using a primers/probe sets targeting VP40 (mRNA,cRNA and vRNA, left), Trailer  
1649 (cRNA and vRNA, right) and *gapdh*. Data normalized to HEK293T LacZ CRISPR-TIM1 cells  
1650 transfected with GFP based on  $\Delta\Delta C_t$  values.

1651 **(G)** Graphical representation of the ratio between observed and expected CpG dinucleotide  
1652 frequencies in the full-length EBOV genomic RNA (grey), in the wild-type trVLP 4cis genome (dark  
1653 blue) and in the trVLP genomic variant with no CpG dinucleotides in the *Renilla* reporter sequence  
1654 (CpG low, light blue).

1655 **(H)** Graphical representation of CpG dinucleotides localization on full-length EBOV genome (upper  
1656 panel), on EBOV trVLP 4cis genome (middle panel) and on a 4cis genome with no CpG on the  
1657 *Renilla* ORF (lower panel). CpG dinucleotides present on intergenic regions are represented in blue,  
1658 while the ones present on viral ORFs are represented in red. In yellow are represented the CpG  
1659 dinucleotides present on the *Renilla* reporter gene.

1660 **(I)** U87-MG LacZ CRISPR and U87-MG KHNYN CRISPR KO cells were transfected with RNP  
1661 proteins and TIM-1, followed by a IFN-I pre-treatment prior to infection with a fixed amount of EBOV  
1662 trVLPs. EBOV trVLP reporter activities in p1 were measured 24 hours after infection.

1663 **(J)** Relative quantification of intracellular viral RNA levels on cellular lysates from (I). Random  
1664 hexamer primers were used to generate cDNAs and RT-qPCR analysis was performed using qPCR  
1665 primers/probe sets targeting the VP40 RNA (vRNA, cRNA and mRNA, left panel) or the 5'-trailer  
1666 region of the trVLP 4cis minigenome (vRNA and cRNA, right panel). Data presented as fold change  
1667 compared to control (no IFN) based on absolute copy numbers.

1668

1669 **Supplemental Figure S3 (related to Figure 5).** TRIM25-mediated ubiquitination of EBOV NP is  
1670 independent of ZAP and MAVS

1671 **(A)** Lysates of HEK293T-TIM1 cells transfected either with GFP or TRIM25, in combination with  
1672 EBOV NP and/or EBOV VP35 were immunoprecipitated with an anti-NP antibody. Cellular lysates  
1673 and pull-downs were analysed by western blot for HSP90, TRIM25, EBOV NP and VP35.

1674 **(B)** Lysates of HEK293T-TIM1 cells transfected either with EBOV NP and/or TRIM25 were left  
1675 untreated (NT), or treated with RNase A prior to immunoprecipitation with an anti-TRIM25 antibody.

1676 Cellular lysates and pull-downs were analysed by western blot for HSP90, TRIM25 and EBOV NP.

1677 **(C)** Lysates of HEK293T LacZ CRISPR and HEK293T ZAP CRISPR KO cells transfected either with  
1678 GFP or TRIM25 and/or EBOV NP were immunoprecipitated with anti-TRIM25 antibody. Cellular  
1679 lysates and pull-down samples were analysed by western blot for HSP90, TRIM25, EBOV NP and  
1680 ZAP.

1681 **(D)** HEK293T-TIM1 cells were transfected either with GFP, TRIM25 wild-type or TRIM25  $\Delta$ RING  
1682 mutant, in combination with EBOV NP and/or a plasmid expressing a HA-tagged Ubiquitin (HA-Ub).  
1683 Lysates from these cells were immunoprecipitated 48 hours later with an anti-HA antibody. Cellular  
1684 lysates and pull-down samples were analysed by western blot for HSP90, TRIM25, NP and HA  
1685 (ubiquitin).

1686 **(E)** HEK293T LacZ CRISPR and HEK293T ZAP CRISPR KO cells were transfected either with GFP  
1687 or TRIM25, in combination with EBOV NP and/or Ub-HA. Lysates from these cells were  
1688 immunoprecipitated 48 hours later with an anti-HA antibody. Cellular lysates and pull-down samples  
1689 were analysed by western blot as in (D).

1690 **(F)** HEK293T LacZ control and HEK293T FL-MAVS/miniMAVS CRISPR DKO cells were transfected  
1691 either with GFP or TRIM25 in combination with EBOV NP and/or HA-Ub. Lysates were  
1692 immunoprecipitated with anti-HA antibody and analysed by western blotting as in (D).

1693 **(G)** HEK293T LacZ CRISPR control and HEK293T TRIM25 CRISPR KO cells were infected with a  
1694 fixed volume of EBOV trVLPs concentrated on a 20% sucrose-cushion. Cell were lysed at the  
1695 depicted time points after infection and lysates analysed by western blot for HSP90 and EBOV NP.

1696

1697 **Supplemental Figure S4 (related to Figure 7).** EBOV trVLP replication is dependent on the entry  
1698 factor NPC1 and it is sensitive to transcription inhibitor T705 (Favipiravir)

1699 **(A)** Cellular lysates from HEK293T LacZ CRISPR-TIM1, HEK293T NPC1 CRISPR KO-TIM1 and  
1700 HEK293T NPC1 CRISPR KO-TIM1 cells with restored expression of NPC1 (+NPC1) were analysed  
1701 by western blot for HSP90 and NPC1.

1702 **(B)** The cells lines used in (A) were transduced either with BlaVP40-EBOV-GP or BlaVP40-VSV-G  
1703 virus-like particles, and 24 hours later the percentages of cells presenting cleavage of CCF2-AM dye  
1704 were determined by flow cytometry as readout for viral particle entry.



1705 **(C)** EBOV trVLP normalized reporter activity on the upper mentioned cell lines (p1) transfected with  
1706 EBOV RNP proteins and infected the following day with a fixed amount of EBOV trVLPs. Reporter  
1707 activities were measured 24 hours later.

1708 **(D)** Quantification of intracellular viral RNA levels on HEK293T-TIM1 target cells 3 and 24 hours post-  
1709 infection with a fixed amount of EBOV trVLPs. Prior to infection the cells were transfected with EBOV  
1710 RNP expressing plasmids together with GFP (grey), TRIM25 (blue) or ZAP-L (red). Strand-specific  
1711 reverse transcription primers were used on total RNA extracted from cells to generate cDNAs for  
1712 minigenomic RNA (vRNA), complementary RNA (cRNA), and mRNA, followed by RT-qPCR analysis.

1713 **(E)** Relative quantification of NP-associated RNA on HEK293T LacZ CRISPR-TIM1 cells transfected  
1714 with GFP (grey), TRIM25 (blue) or ZAP-L (red) prior to infection with wild-type or CpG low EBOV  
1715 trVLPs. 3 hours post-infection cells were UV cross-linked, and EBOV NP from incoming virions was  
1716 immunoprecipitated from lysates with an anti-NP antibody. Following proteinase K treatment, pulled-  
1717 down RNAs were extracted with Qiazol / chloroform, random hexamer primers used to generate  
1718 cDNAs, and RT-qPCR analysis performed using a primers/probe set targeting EBOV VP40 RNA.  
1719 Values are presented as percentage of absolute RNA copy numbers on cells transfected with GFP.

1720 **(F)** HEK293T LacZ CRISPR, HEK293T ZAP CRISPR KO and HEK293T TRIM25 CRISPR KO cells  
1721 stably expressing TIM1 were transfected with GFP (grey), TRIM25 (blue) or ZAP-L (red) as depicted  
1722 in the panels, and later infected with wild-type (solid bars) or CpG low (striped bars) EBOV trVLPs.  
1723 Relative quantification of NP-associated RNA was determined as in (E).

1724 **(G)** EBOV trVLP reporter activities on HEK293T-TIM1 target cells (p1), transfect with RNP proteins  
1725 and pre-treated overnight with increasing amounts of T-705 (Favipiravir) prior to infection. Reporter  
1726 activities measured 24 hours after infection.

1727 **(H)** Relative quantification of intracellular viral RNA levels on HEK293T-TIM1 p1 target cells pre-  
1728 treated with increasing amounts of T-705 compound and infected with EBOV trVLPs as in (G).  
1729 Random hexamer primers were used to generate cDNAs and RT-qPCR analysis was performed  
1730 using qPCR primers/probe sets targeting the VP40 mRNA or *gapdh* as endogenous control. Data  
1731 presented as fold change compared to control (no T-705) based on  $\Delta\Delta C_t$  values.

1732 **(I)** Graphical representation of CpG dinucleotides localization on a monocistronic genome containing  
1733 a *Renilla* reporter gene flanked by the 5'-leader and 3'-trailer regions of EBOV genome (upper panel),  
1734 and its Low-CpG variant (bottom panel) in which all CpGs in the *Renilla* ORF were silently mutated.

1735 CpG dinucleotides present on the trailer and leader regions are represented in blue, while in yellow  
1736 are represented the CpG dinucleotides present on the *Renilla* reporter gene.

1737 **(J)** Normalized reporter activity of the monocistronic genomes on HEK293T-TIM1 target transfected  
1738 with EBOV RNP proteins, and either GFP (grey) or ZAP-L (red) prior to infection with increasing  
1739 amounts of wild-type monocistronic VLPs (WT, solid lines) or a variant with no CpG dinucleotides on  
1740 the *Renilla* ORF (CpG low, striped lines).

1741 **(K)** HEK293T LacZ CRISPR-TIM1 cells were transfected with GFP (grey) or ZAP-L (red) and later  
1742 infected with wild-type (solid bars) or CpG low (striped bars) monocistronic VLPs. Relative  
1743 quantification of ZAP-associated RNA was determined as in (E).

1744 **(L)** HEK293T LacZ CRISPR and HEK293T NPC1 CRISPR stably expressing TIM1 were infected with  
1745 either WT or  $\Delta$ GP EBOV nanoluciferase trVLPs. EBOV trVLP nanoluc reporter activities were  
1746 measured 48 hpi.

1747 **(M)** HEK293T TRIM25 CRISPR KO cells were transfected with TIM1 and either a CRISPR-resistant  
1748 version of TRIM25 or YFP before infection with WT or  $\Delta$ GP EBOV nanoluciferase trVLPs. EBOV  
1749 trVLP nanoluc reporter activities were measured 48 hpi.

1750

1751

Figure 1

bioRxiv preprint doi: <https://doi.org/10.1101/2021.05.23.445113>; this version posted May 24, 2021. The copyright holder for this preprint (which was not certified by peer review) is the author/funder, who has granted bioRxiv a license to display the preprint in perpetuity. It is made available under aCC-BY-NC-ND 4.0 International license.

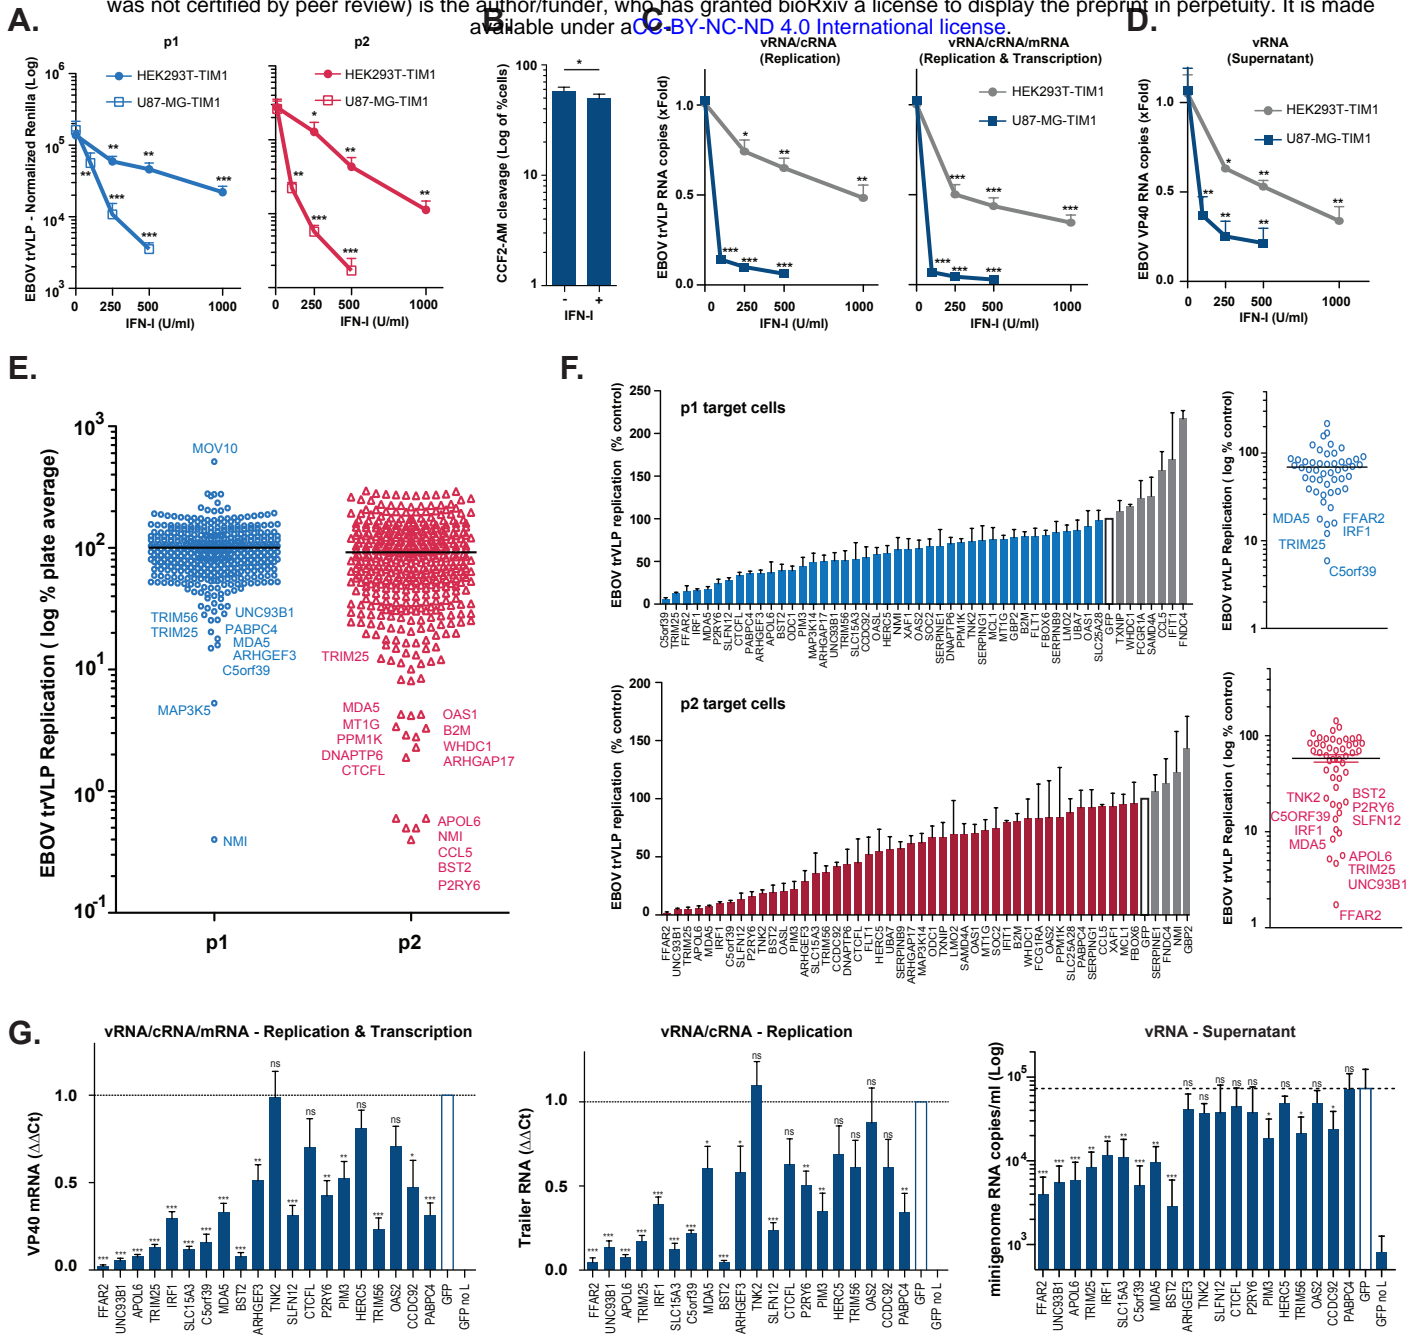

Figure 2

bioRxiv preprint doi: <https://doi.org/10.1101/2021.05.23.445113>; this version posted May 24, 2021. The copyright holder for this preprint (which was not certified by peer review) is the author/funder, who has granted bioRxiv a license to display the preprint in perpetuity. It is made available under a [CC-BY-NC-ND 4.0 International license](https://creativecommons.org/licenses/by-nc-nd/4.0/).

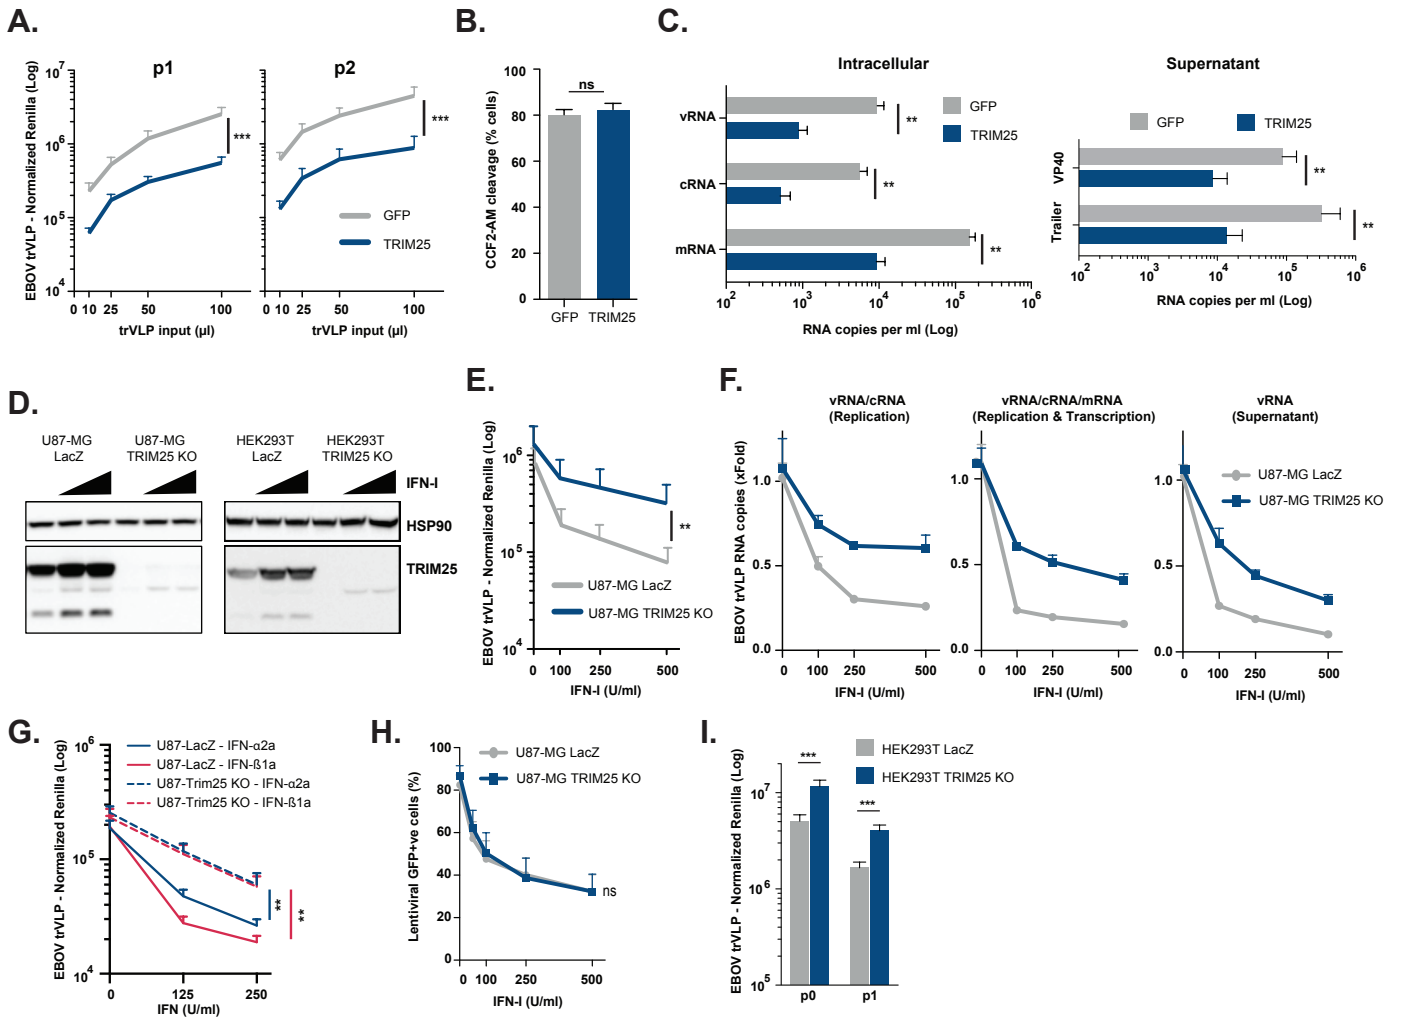

Figure 3

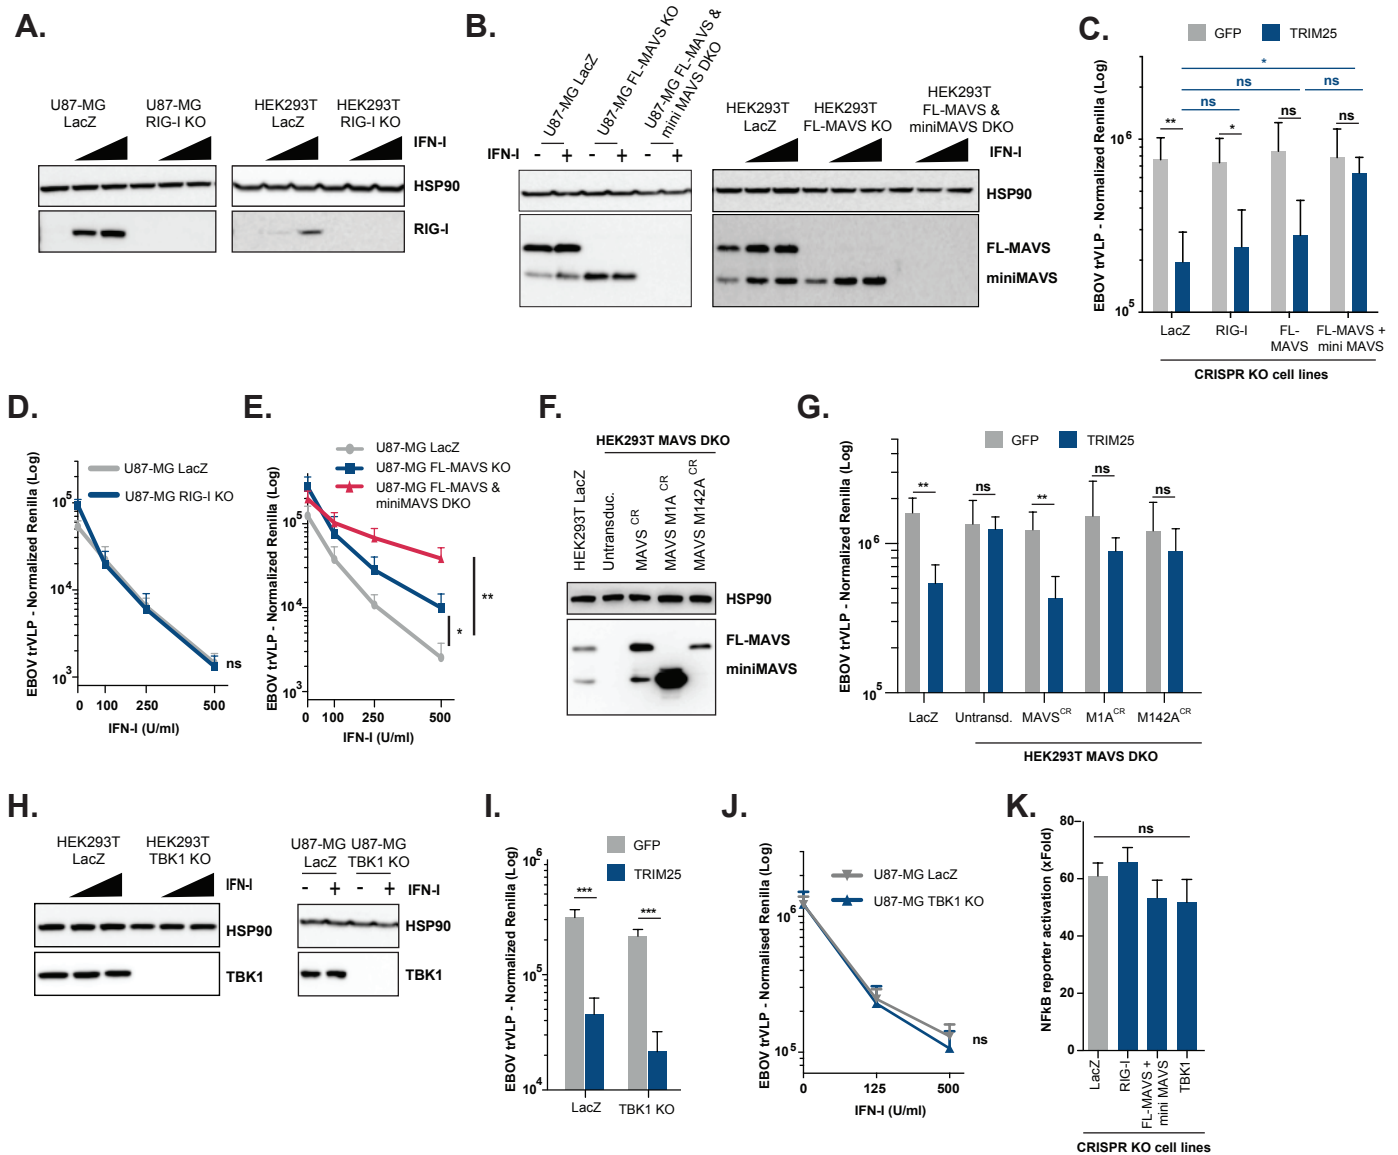

Figure 4

bioRxiv preprint doi: <https://doi.org/10.1101/2021.05.23.445113>; this version posted May 24, 2021. The copyright holder for this preprint (which was not certified by peer review) is the author/funder, who has granted bioRxiv a license to display the preprint in perpetuity. It is made available under a [CC-BY-NC-ND 4.0 International license](https://creativecommons.org/licenses/by-nc-nd/4.0/).

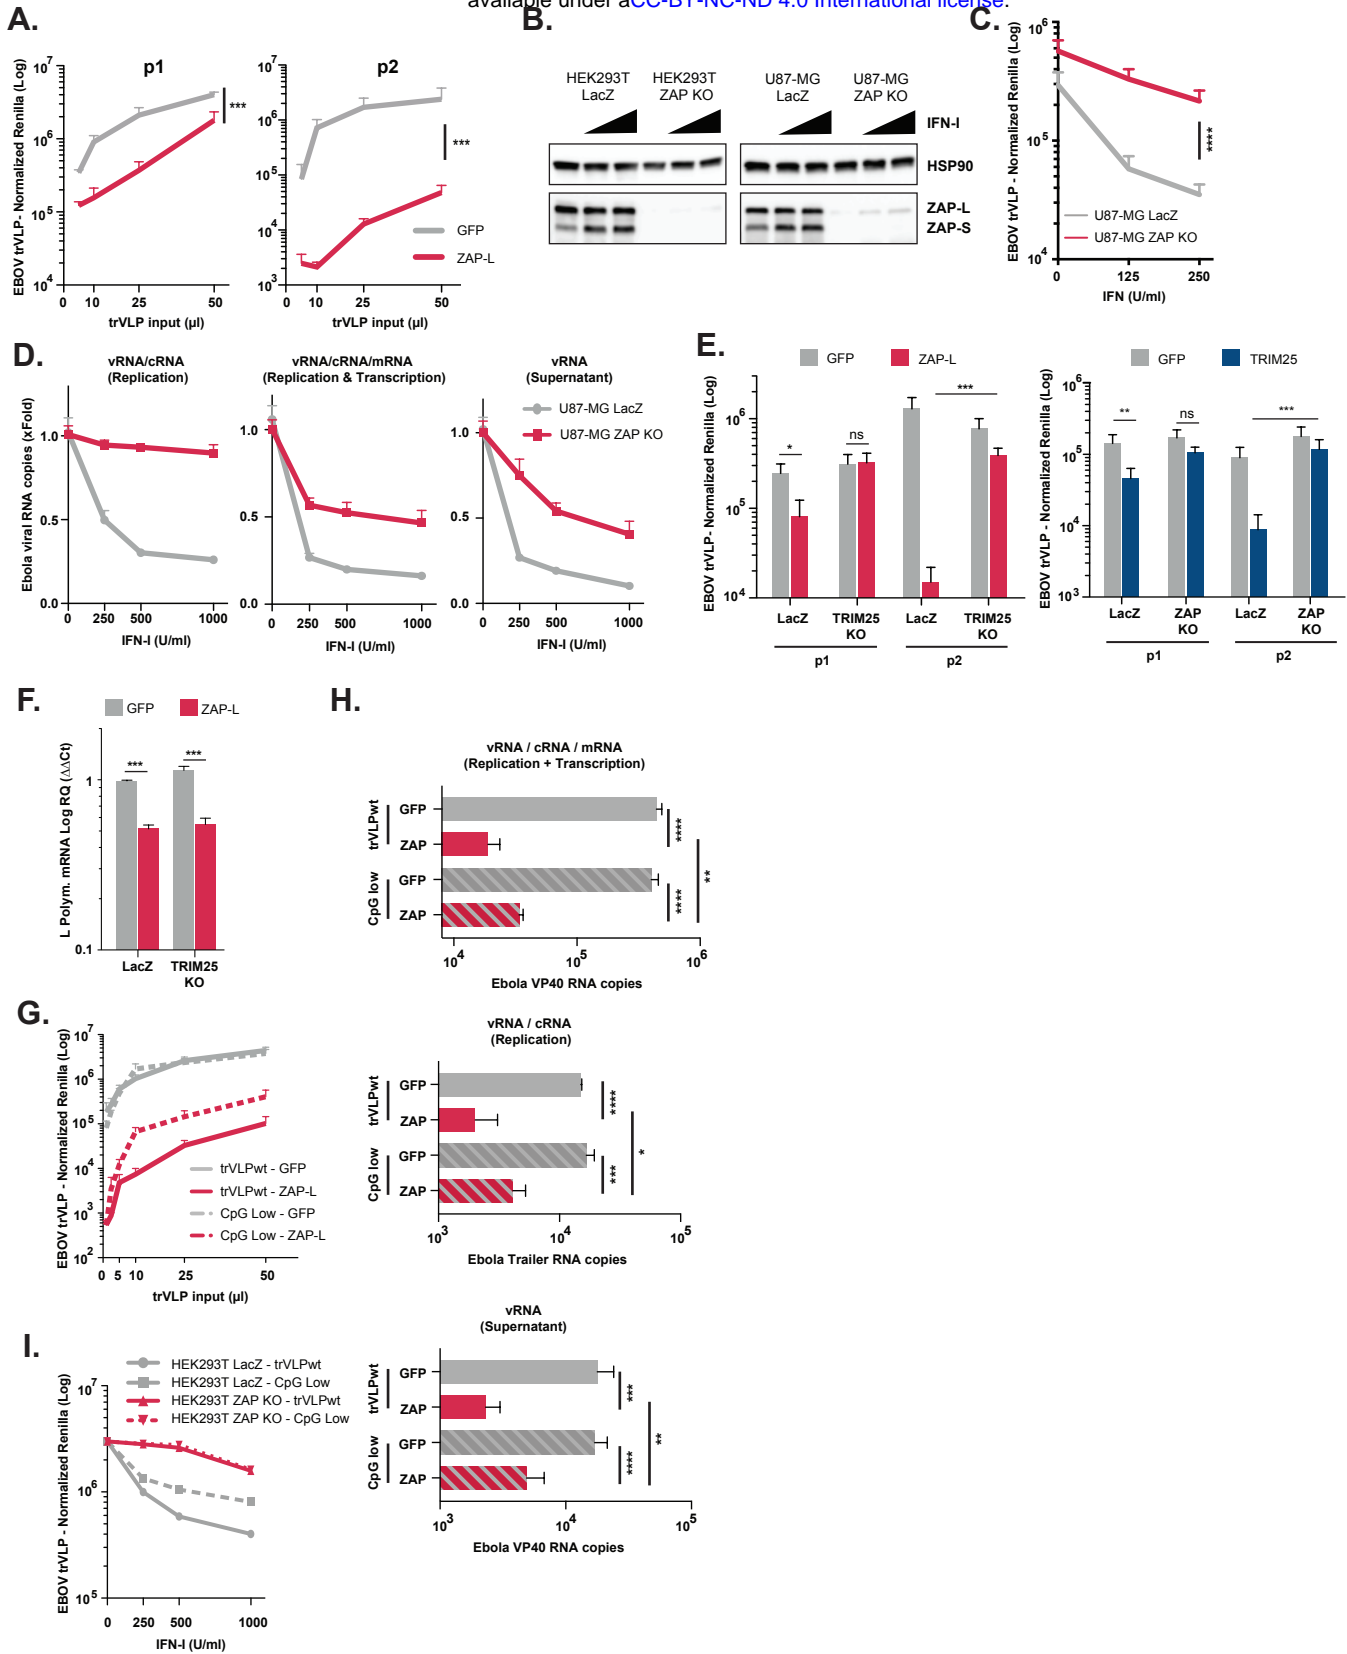

Figure 5

A.

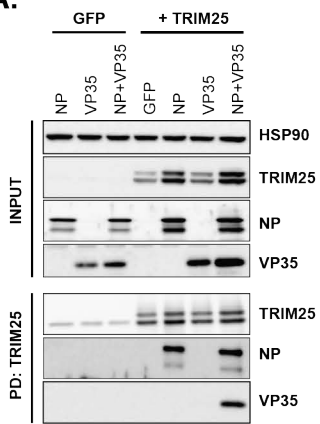

B.

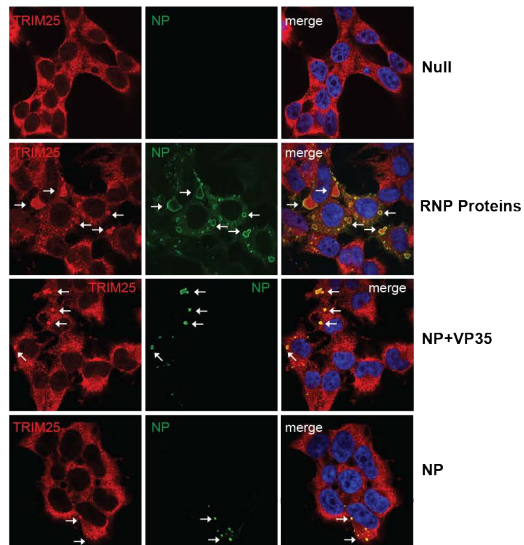

C.

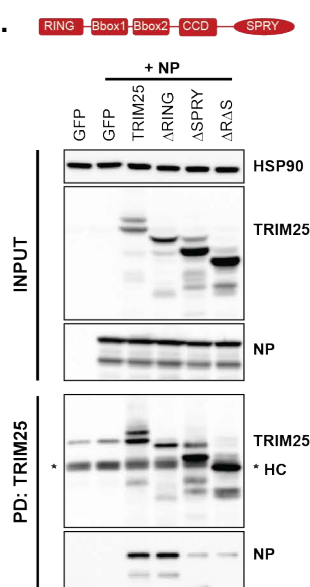

D.

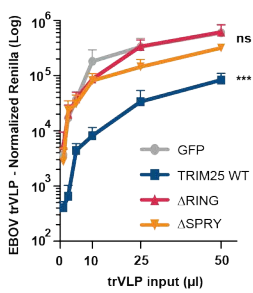

E.

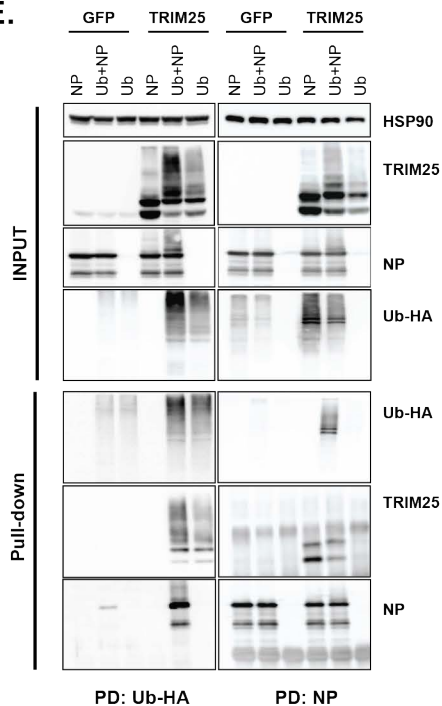

F.

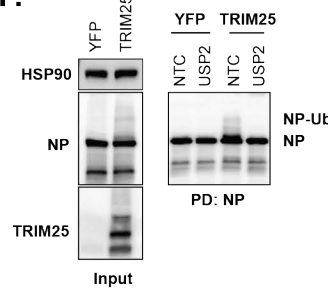

Figure 6

bioRxiv preprint doi: <https://doi.org/10.1101/2021.05.23.445113>; this version posted May 24, 2021. The copyright holder for this preprint (which was not certified by peer review) is the author/funder, who has granted bioRxiv a license to display the preprint in perpetuity. It is made available under a [CC-BY-NC-ND 4.0 International license](#).

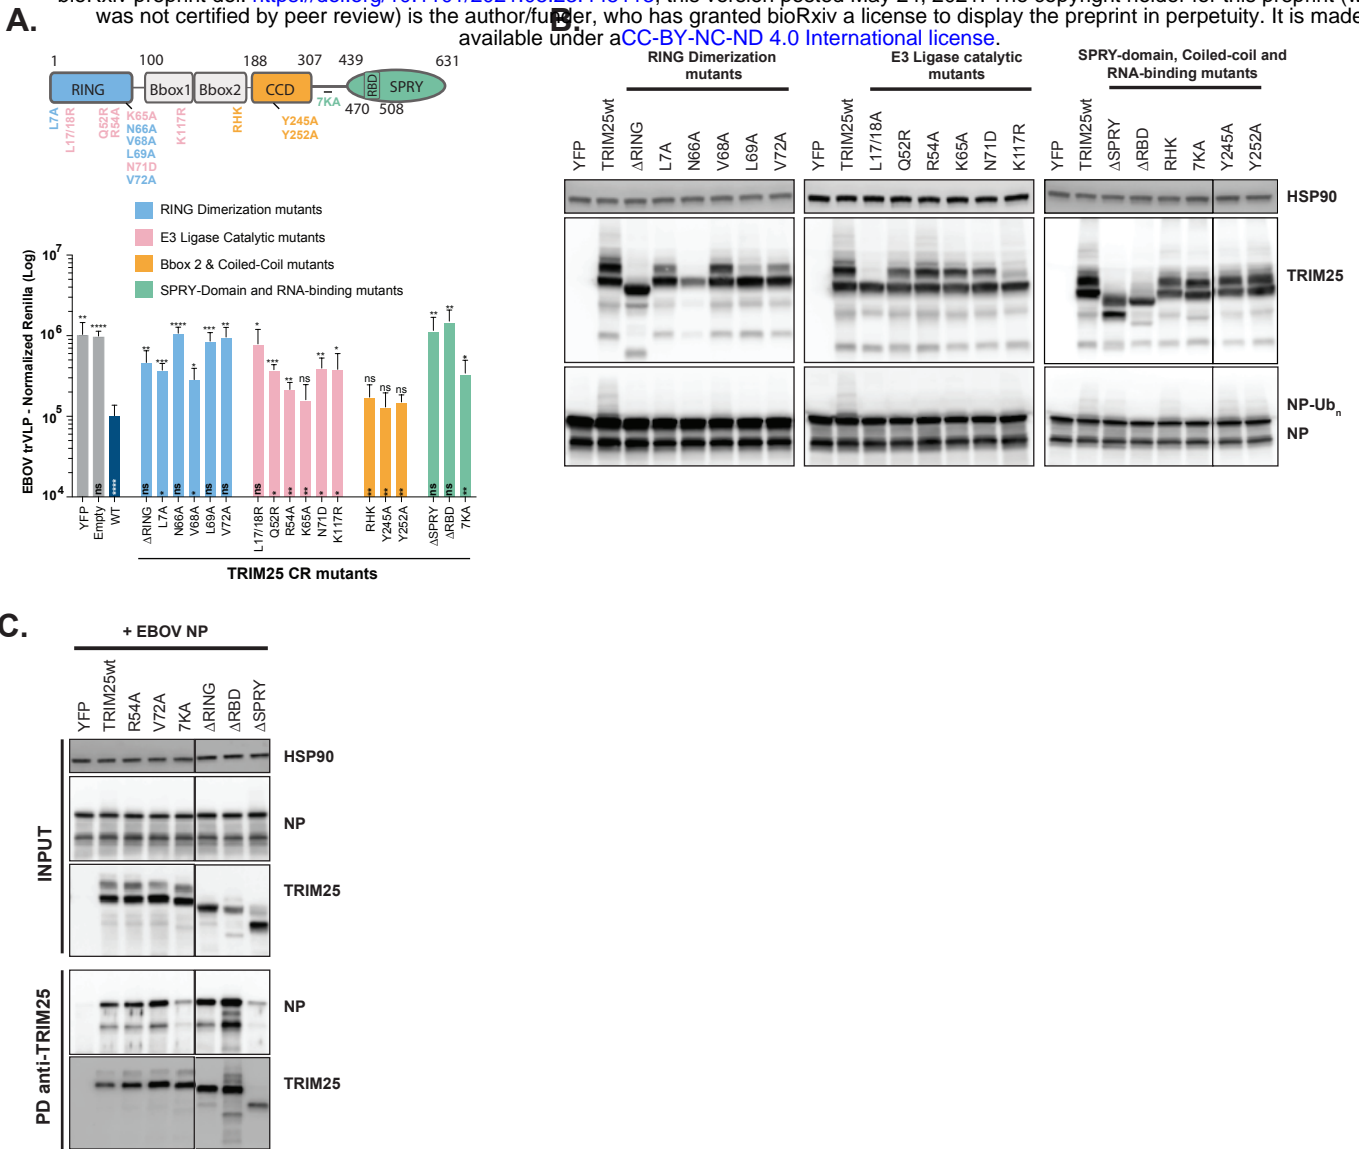



A.

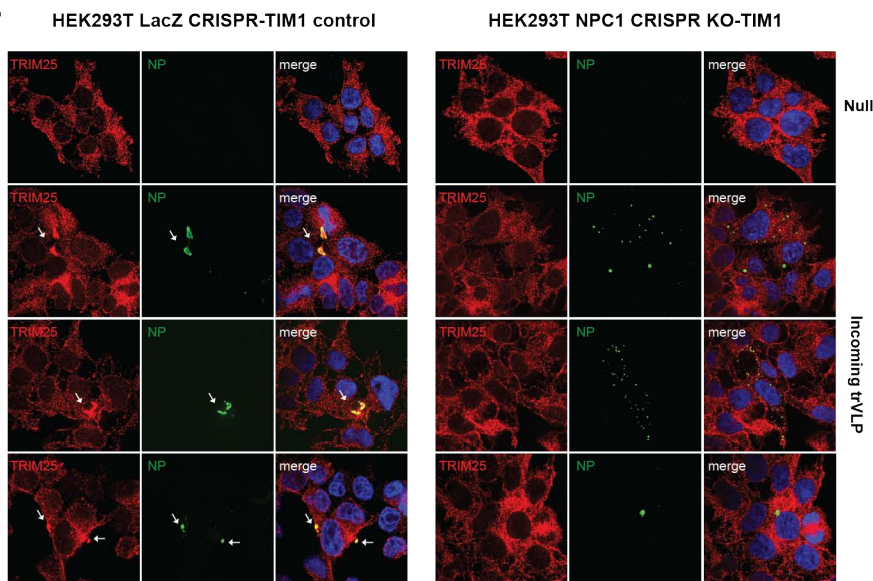

B.

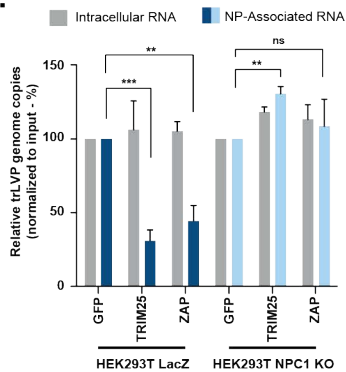

C.

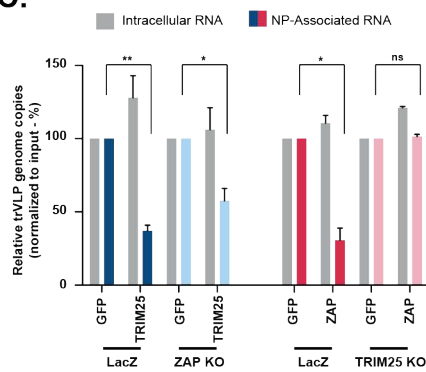

D.

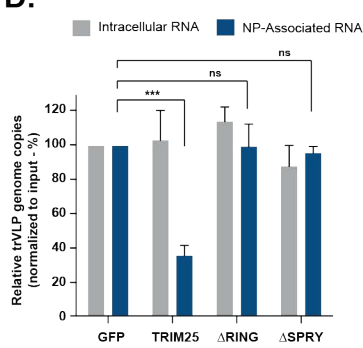

E.

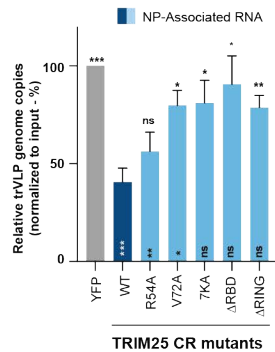

F.

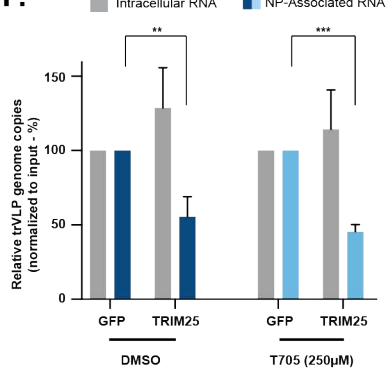

G.

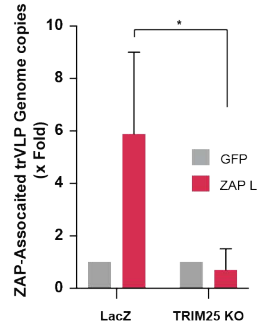

H.

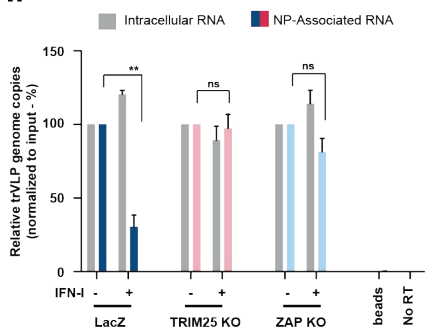

I.

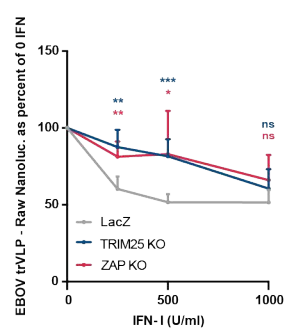

J.

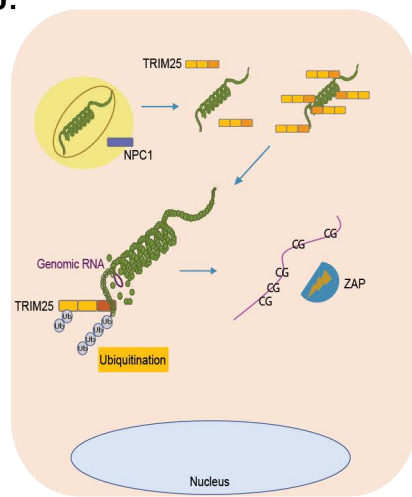

A.

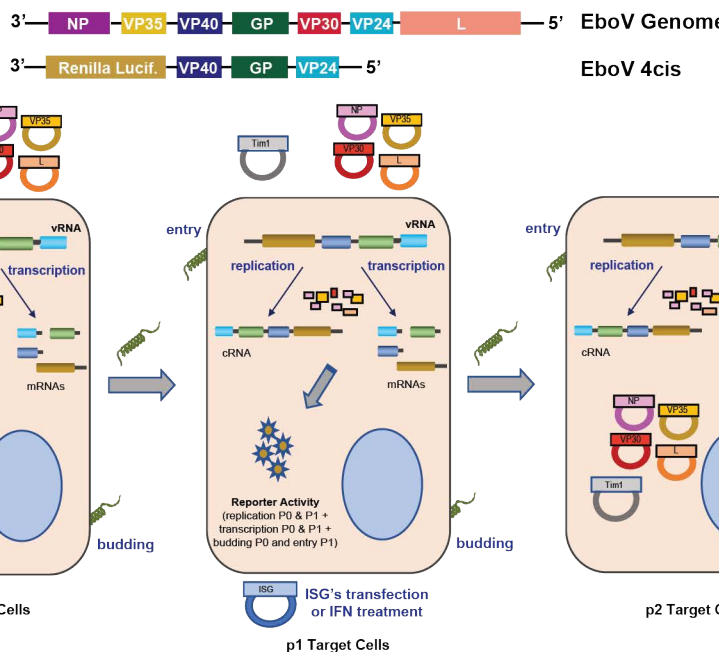

B.

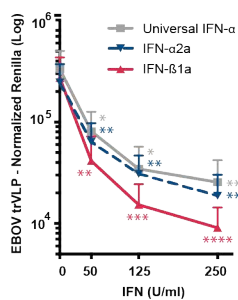

C.

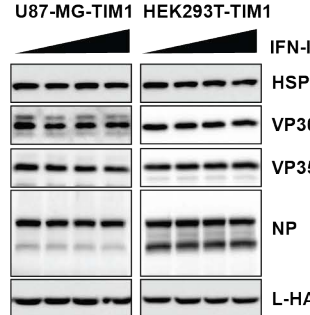

F.

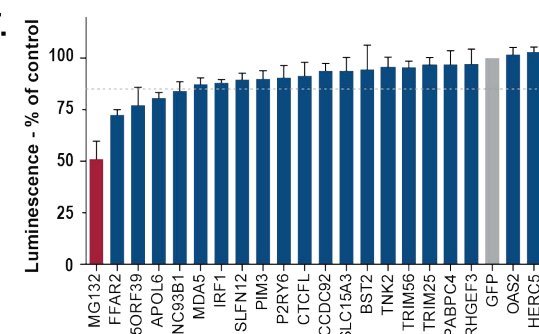

D.

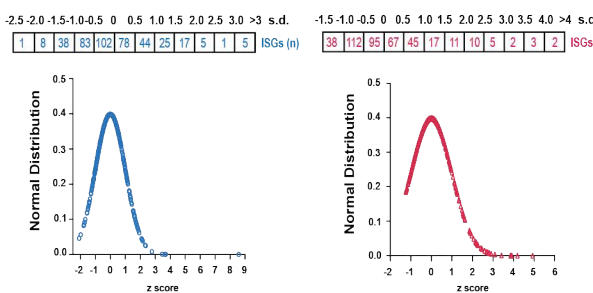

E.

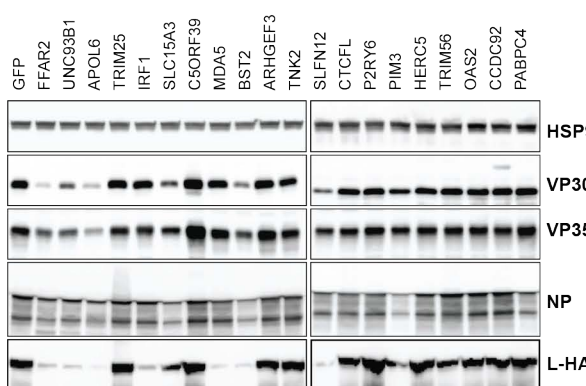

G.

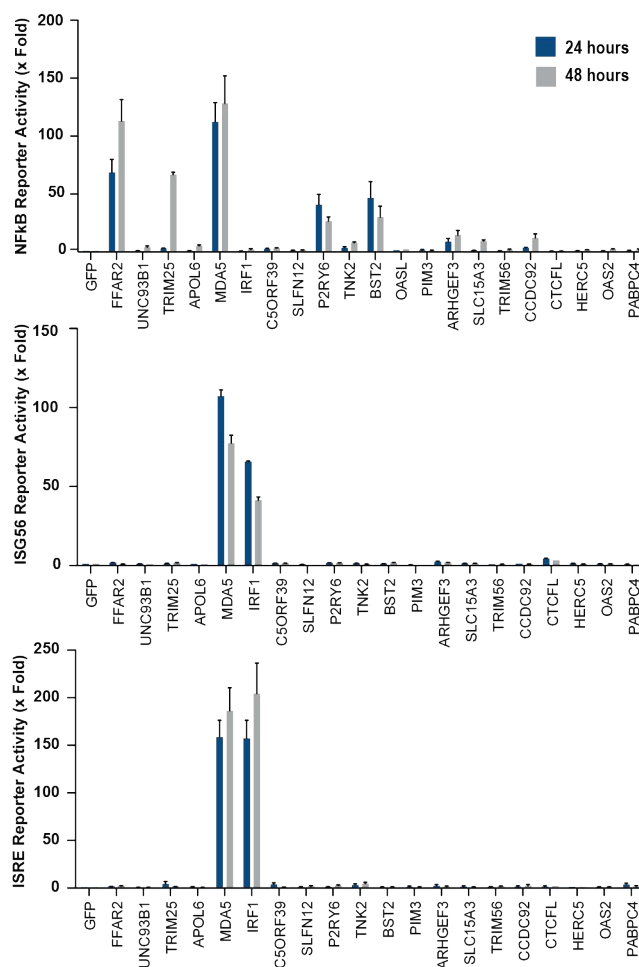

Figure S2 (related to Figure 4)

bioRxiv preprint doi: <https://doi.org/10.1101/2021.05.23.445113>; this version posted May 24, 2021. The copyright holder for this preprint (which was not certified by peer review) is the author/funder, who has granted bioRxiv a license to display the preprint in perpetuity. It is made available under aCC-BY-NC-ND 4.0 International license.

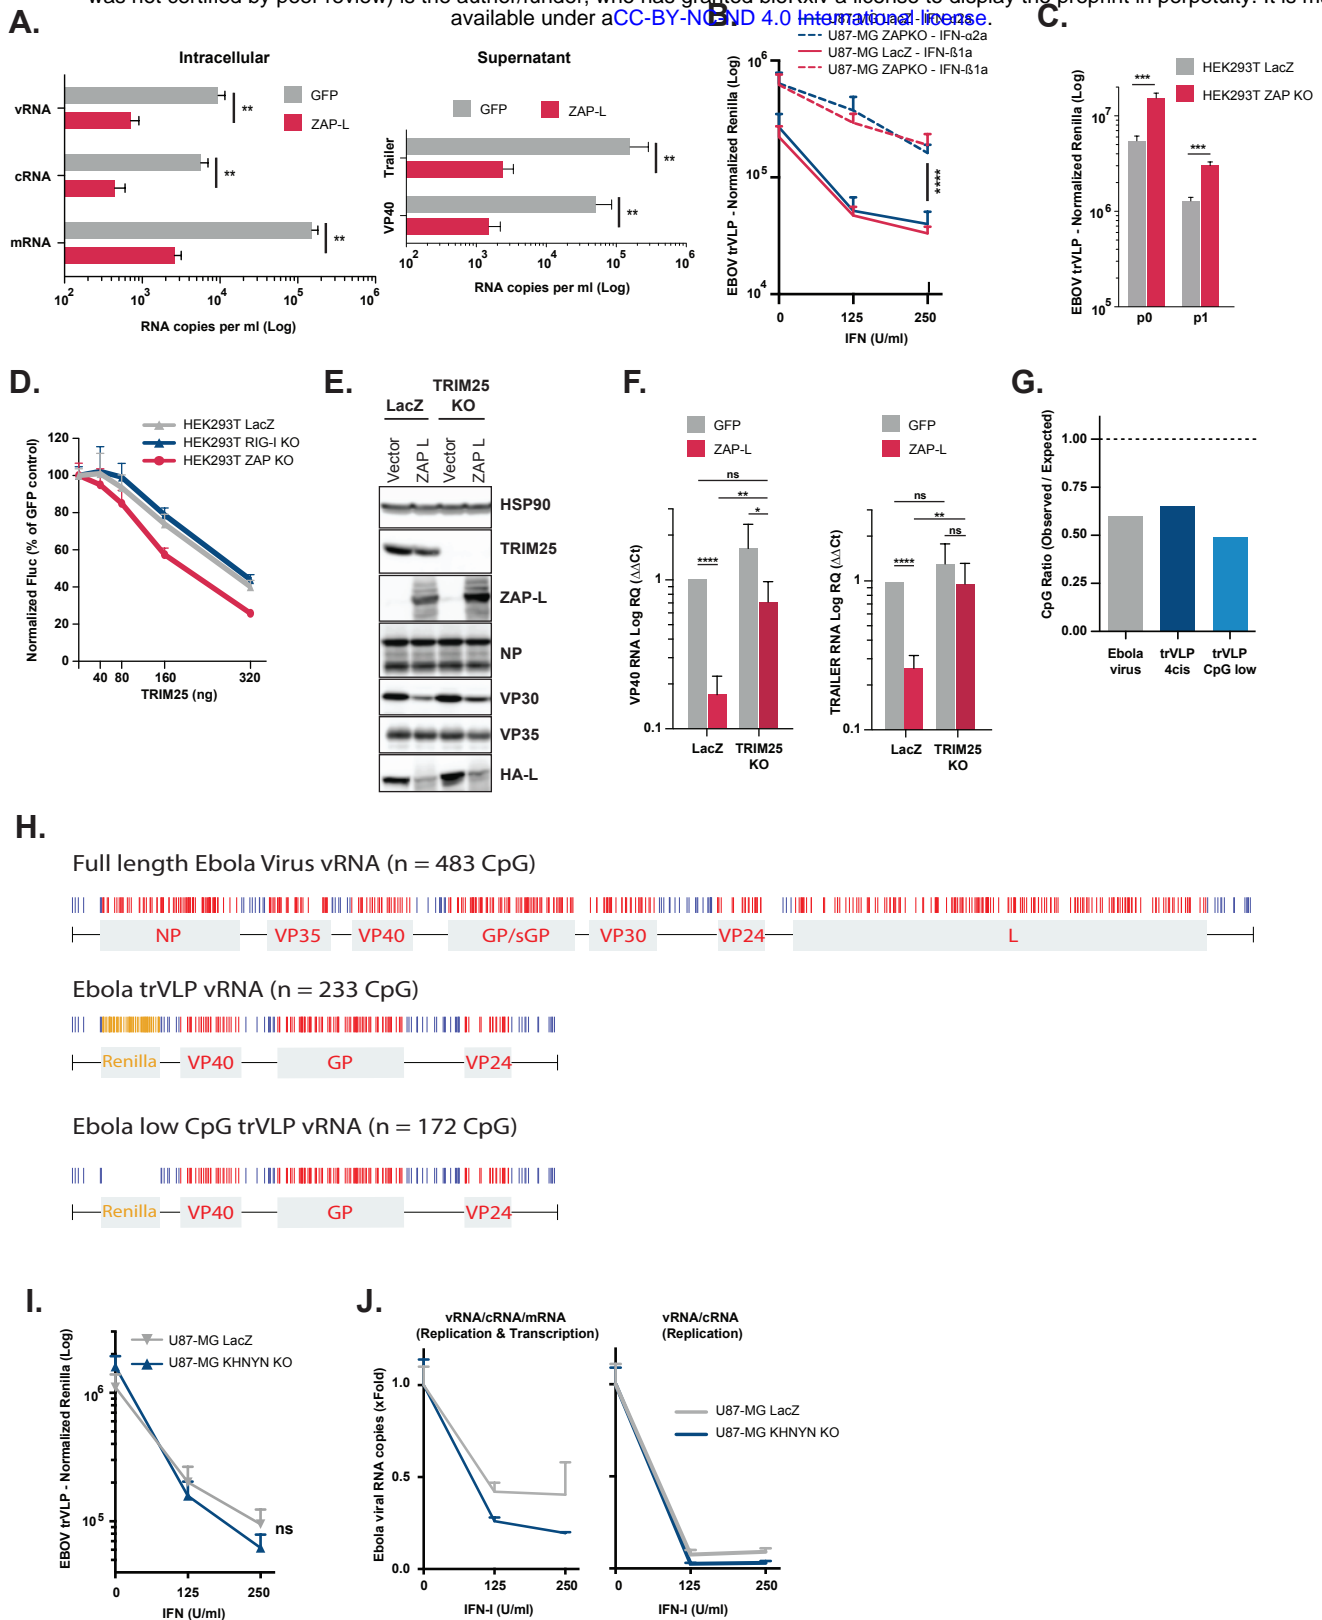

Figure S3 (related to Figure 5)

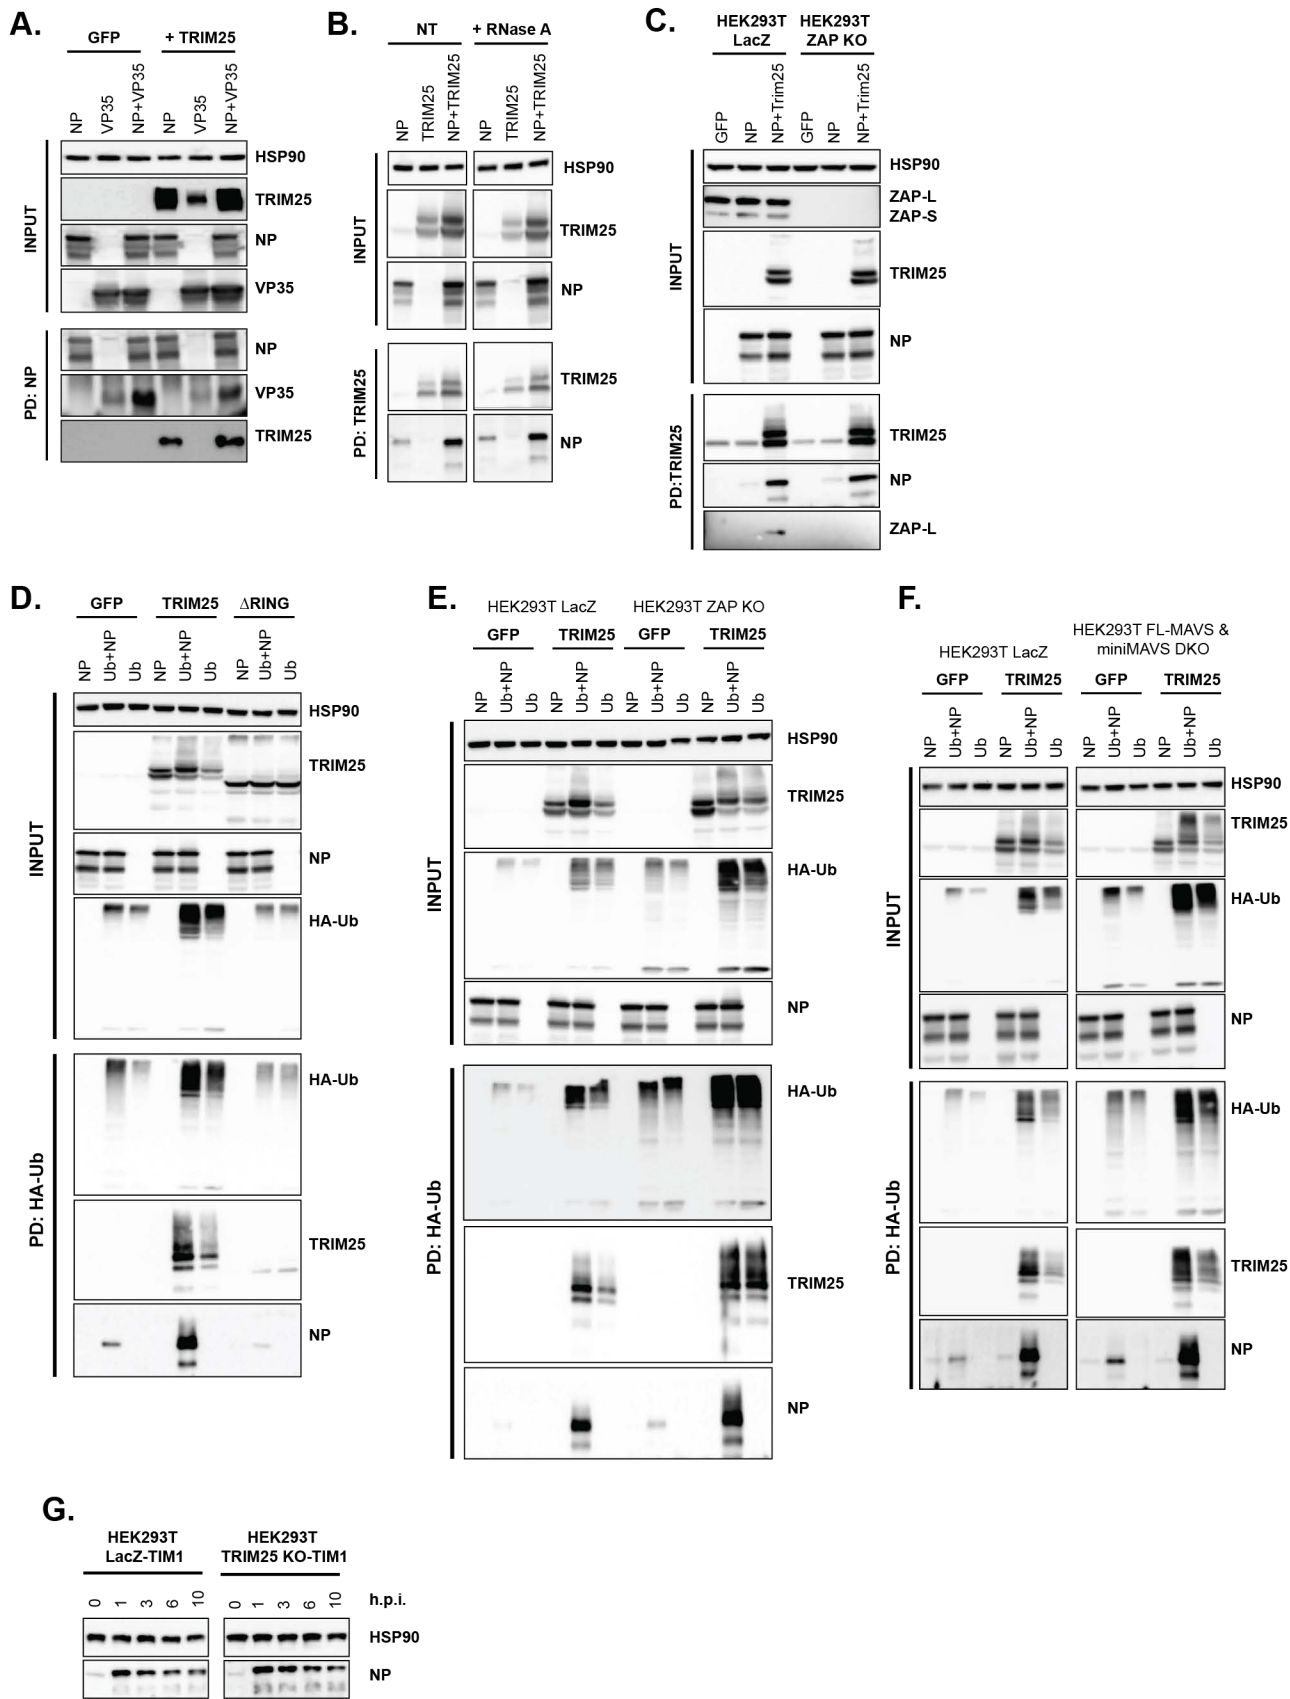

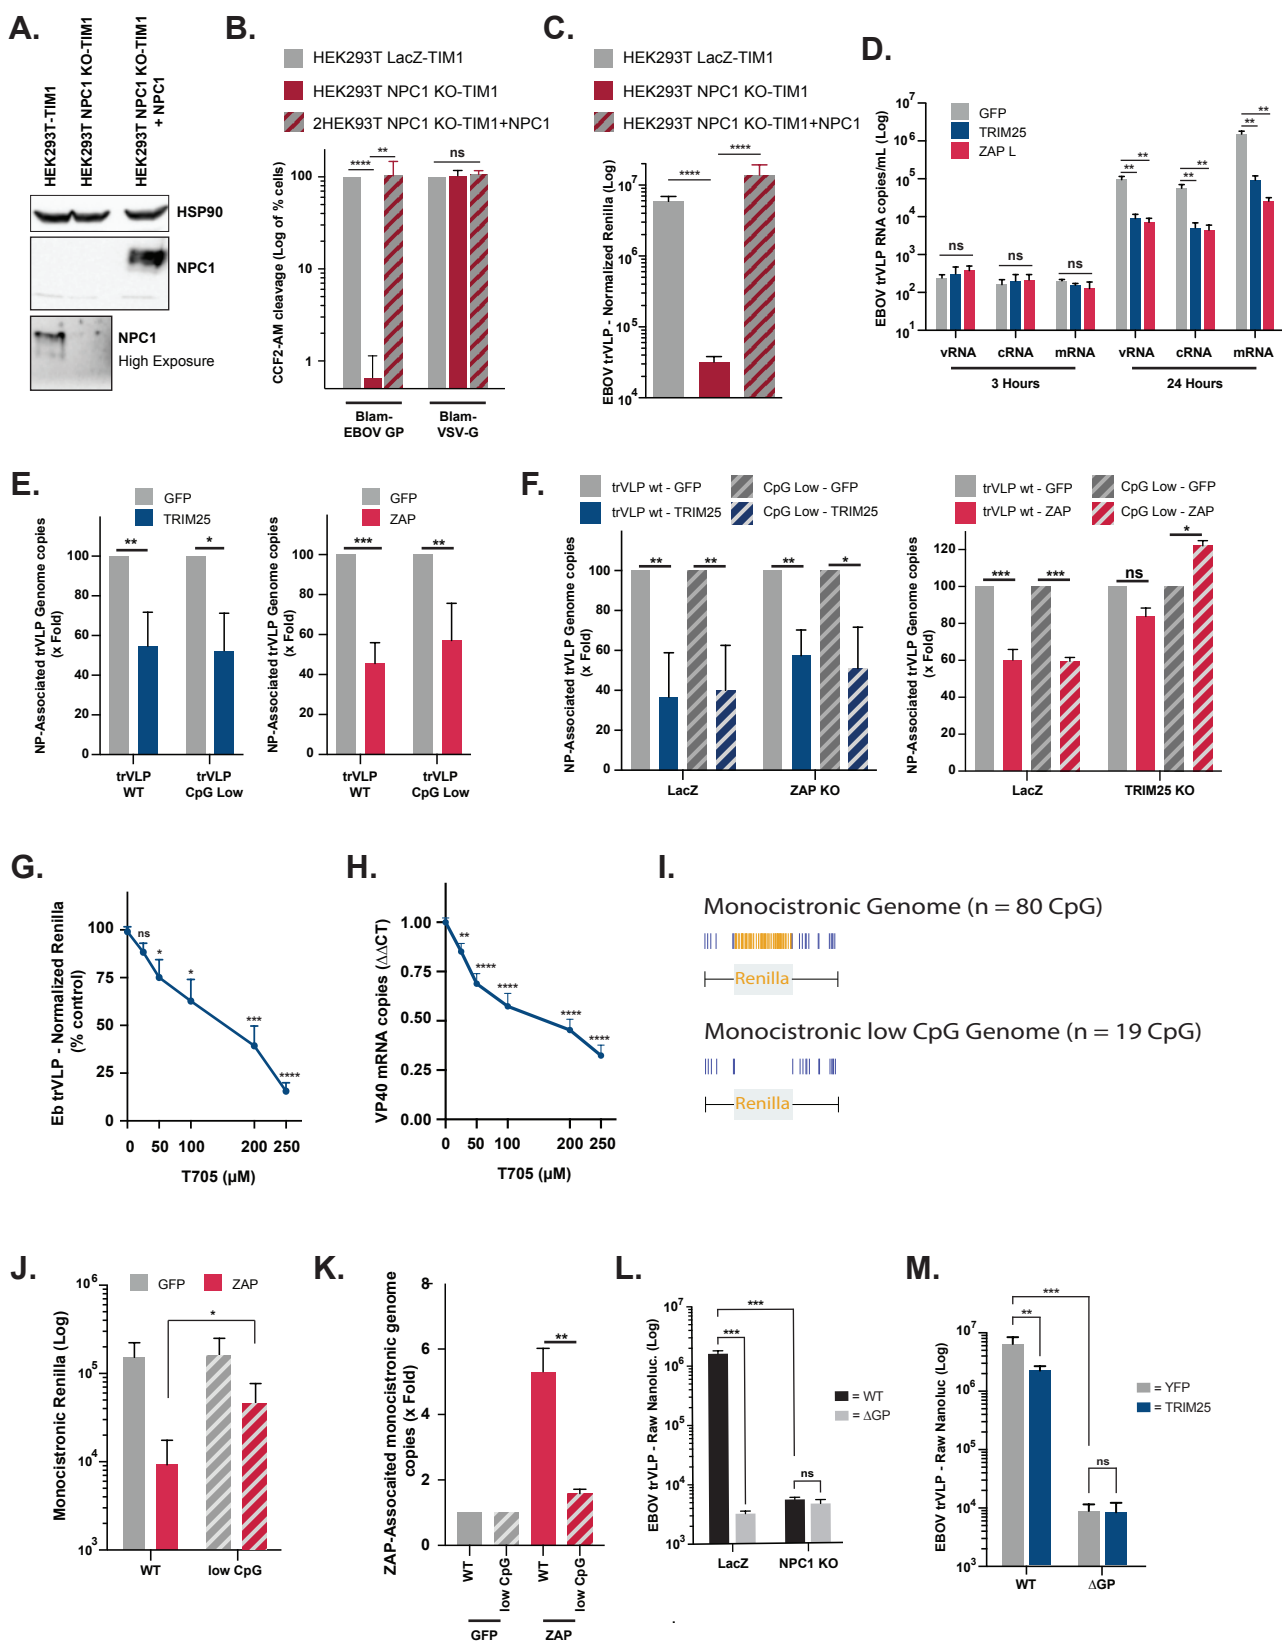

**Supplemental Table 1**

Large Scale ISG Screen: EboV trVLP in HEK293T cells – p1 and p2 values (Page 1 of 4)

| Gene         | P2                      |         | P1                      |         | Gene      | P2                      |         | P1                      |         |
|--------------|-------------------------|---------|-------------------------|---------|-----------|-------------------------|---------|-------------------------|---------|
|              | Replication (% control) | Z score | Replication (% control) | Z score |           | Replication (% control) | Z score | Replication (% control) | Z score |
| P2RY6        | 0.4                     | -1.24   | 41.5                    | -1.23   | MCOLN     | 28.0                    | -0.89   | 40.4                    | -1.25   |
| BST2/THN     | 0.5                     | -1.24   | 91.8                    | -0.18   | ZNF313    | 28.1                    | -0.89   | 53.5                    | -0.98   |
| CCL5         | 0.5                     | -1.24   | 106.0                   | 0.11    | PDGFRL    | 28.3                    | -0.89   | 100.0                   | -0.01   |
| NMI          | 0.6                     | -1.24   | 0.4                     | -2.08   | PNPT1     | 28.7                    | -0.88   | 103.6                   | 0.06    |
| APOL6        | 0.6                     | -1.24   | 188.5                   | 1.83    | PHF15     | 28.7                    | -0.88   | 119.2                   | 0.39    |
| ARHGAP17     | 1.9                     | -1.22   | 57.9                    | -0.88   | GBP5      | 28.9                    | -0.88   | 116.9                   | 0.34    |
| WHDC1        | 2.3                     | -1.21   | 32.0                    | -1.42   | JAK2      | 29.6                    | -0.87   | 96.8                    | -0.08   |
| B2M          | 2.8                     | -1.21   | 108.2                   | 0.16    | ATF3      | 30.3                    | -0.86   | 116.4                   | 0.33    |
| OAS1         | 2.9                     | -1.21   | 76.4                    | -0.50   | C10orf10  | 30.5                    | -0.86   | 41.8                    | -1.22   |
| CTCFL        | 3.3                     | -1.20   | 55.6                    | -0.93   | AIM2      | 30.5                    | -0.86   | 70.3                    | -0.63   |
| DNAPT6       | 3.4                     | -1.20   | 58.4                    | -0.88   | CCL19     | 30.6                    | -0.86   | 78.0                    | -0.47   |
| PPM1K        | 4.2                     | -1.19   | 35.0                    | -1.36   | RAB27A    | 30.9                    | -0.86   | 58.7                    | -0.87   |
| MT1G         | 4.3                     | -1.19   | 57.1                    | -0.90   | IFI35     | 31.1                    | -0.85   | 174.6                   | 1.54    |
| IFIH1 / MDA5 | 4.3                     | -1.19   | 17.9                    | -1.72   | FBXO6     | 31.4                    | -0.85   | 52.3                    | -1.00   |
| FNDC4        | 8.1                     | -1.14   | 142.9                   | 0.88    | UNC93B1   | 31.9                    | -0.84   | 28.2                    | -1.50   |
| C5orf39      | 8.3                     | -1.14   | 15.0                    | -1.78   | HLA-E     | 32.1                    | -0.84   | 66.7                    | -0.70   |
| SOCS2        | 8.5                     | -1.14   | 77.3                    | -0.48   | GTPBP2    | 32.5                    | -0.84   | 184.2                   | 1.74    |
| FCGR1A       | 10.1                    | -1.12   | 148.1                   | 0.99    | GLRX      | 32.8                    | -0.83   | 60.9                    | -0.82   |
| MCL1         | 11.2                    | -1.10   | 124.4                   | 0.50    | CX3CL1    | 33.1                    | -0.83   | 212.9                   | 2.33    |
| ARHGFE3      | 11.4                    | -1.10   | 15.9                    | -1.76   | TAP2      | 33.2                    | -0.83   | 145.1                   | 0.92    |
| FLT1         | 11.7                    | -1.10   | 67.9                    | -0.68   | XAF1      | 33.4                    | -0.82   | 55.0                    | -0.95   |
| MAP3K14      | 11.9                    | -1.09   | 63.6                    | -0.77   | WARS      | 33.7                    | -0.82   | 112.2                   | 0.24    |
| OASL         | 12.1                    | -1.09   | 123.2                   | 0.47    | IFNGR1    | 34.1                    | -0.82   | 51.7                    | -1.01   |
| TNK2         | 12.4                    | -1.09   | 165.0                   | 1.34    | SLC25A28  | 34.5                    | -0.81   | 105.1                   | 0.10    |
| GBP2         | 13.2                    | -1.08   | 74.2                    | -0.55   | VIPERIN   | 34.7                    | -0.81   | 98.2                    | -0.05   |
| GALNT2       | 13.7                    | -1.07   | 133.9                   | 0.69    | ZBP1      | 34.9                    | -0.81   | 54.1                    | -0.96   |
| FFAR2        | 14.9                    | -1.06   | 43.0                    | -1.20   | MYD88     | 35.4                    | -0.80   | 46.4                    | -1.12   |
| CCDC92       | 15.0                    | -1.06   | 79.8                    | -0.43   | CASP7     | 35.5                    | -0.80   | 71.3                    | -0.61   |
| LMO2         | 15.4                    | -1.05   | 80.7                    | -0.41   | NDC80     | 35.6                    | -0.80   | 66.9                    | -0.70   |
| SLC15A3      | 16.0                    | -1.04   | 174.0                   | 1.53    | MAFF      | 36.0                    | -0.79   | 97.5                    | -0.06   |
| HERC5        | 16.6                    | -1.04   | 77.1                    | -0.49   | APOBEC3A  | 36.5                    | -0.79   | 56.2                    | -0.92   |
| TXNIP        | 16.6                    | -1.03   | 80.5                    | -0.42   | ZNF385B   | 36.6                    | -0.78   | 61.2                    | -0.82   |
| UBA7         | 17.5                    | -1.02   | 55.8                    | -0.93   | DEFB1     | 37.1                    | -0.78   | 80.9                    | -0.41   |
| PIM3         | 17.5                    | -1.02   | 87.6                    | -0.27   | XRN       | 37.1                    | -0.78   | 88.0                    | -0.26   |
| TRIM25       | 17.7                    | -1.02   | 25.4                    | -1.56   | SAMD4A    | 38.3                    | -0.76   | 62.5                    | -0.79   |
| TRIM56       | 19.2                    | -1.00   | 25.6                    | -1.56   | SMAD3     | 38.7                    | -0.76   | 80.5                    | -0.42   |
| SLFN12       | 19.4                    | -1.00   | 56.1                    | -0.92   | STAT2     | 39.9                    | -0.74   | 105.0                   | 0.09    |
| STEAP4       | 19.8                    | -1.00   | 86.3                    | -0.30   | PUS1      | 39.9                    | -0.74   | 120.3                   | 0.41    |
| CXCL10       | 19.8                    | -0.99   | 90.5                    | -0.21   | IFIT3     | 40.9                    | -0.73   | 92.5                    | -0.17   |
| MAB21L2      | 19.9                    | -0.99   | 130.6                   | 0.62    | C15orf48  | 41.2                    | -0.73   | 63.9                    | -0.76   |
| FAM46C       | 20.6                    | -0.99   | 38.6                    | -1.29   | IFITM1    | 41.3                    | -0.73   | 109.3                   | 0.18    |
| MX2          | 21.6                    | -0.97   | 49.9                    | -1.05   | GK        | 41.4                    | -0.72   | 67.8                    | -0.68   |
| GBP1         | 21.8                    | -0.97   | 78.6                    | -0.46   | SAT1      | 42.4                    | -0.71   | 93.9                    | -0.14   |
| PABPC4       | 22.0                    | -0.97   | 20.4                    | -1.67   | KIAA0082  | 42.5                    | -0.71   | 50.9                    | -1.03   |
| SERPINE1     | 22.3                    | -0.96   | 52.2                    | -1.00   | TNFRSF10A | 43.7                    | -0.70   | 177.3                   | 1.59    |
| SERPING1     | 23.2                    | -0.95   | 68.0                    | -0.68   | TNFAIP3   | 44.3                    | -0.69   | 182.0                   | 1.69    |
| C5orf27      | 23.5                    | -0.95   | 81.9                    | -0.39   | IL28RA    | 44.4                    | -0.69   | 80.4                    | -0.42   |
| SERPIN9      | 23.8                    | -0.94   | 155.3                   | 1.14    | NFIL3     | 45.0                    | -0.68   | 78.1                    | -0.47   |
| IRF1         | 24.0                    | -0.94   | 33.2                    | -1.40   | RARRES3   | 45.1                    | -0.68   | 97.0                    | -0.07   |
| HCP5         | 24.5                    | -0.94   | 110.4                   | 0.21    | BIRC3     | 46.4                    | -0.66   | 67.0                    | -0.70   |
| ODC1         | 24.6                    | -0.93   | 151.4                   | 1.06    | HEG1      | 46.5                    | -0.66   | 74.1                    | -0.55   |
| TRIM14       | 24.7                    | -0.93   | 65.9                    | -0.72   | C9orf19   | 46.5                    | -0.66   | 85.1                    | -0.32   |
| CLEC4D       | 25.3                    | -0.93   | 68.9                    | -0.66   | HSPA6     | 46.6                    | -0.66   | 124.7                   | 0.50    |
| IFIT1        | 25.4                    | -0.92   | 96.3                    | -0.09   | USP18     | 47.4                    | -0.65   | 52.6                    | -1.00   |
| CNP          | 25.5                    | -0.92   | 156.1                   | 1.15    | DDX60     | 47.7                    | -0.65   | 87.9                    | -0.26   |
| NCF1         | 26.8                    | -0.91   | 92.8                    | -0.16   | EPAS1     | 48.0                    | -0.64   | 193.5                   | 1.93    |
| CD274        | 26.9                    | -0.91   | 88.2                    | -0.26   | SAMHD1    | 48.2                    | -0.64   | 55.7                    | -0.93   |
| IFI27        | 27.5                    | -0.90   | 95.5                    | -0.10   | FAM125B   | 48.4                    | -0.64   | 60.8                    | -0.82   |
| CEACAM1      | 27.6                    | -0.90   | 59.7                    | -0.85   | STAP1     | 49.1                    | -0.63   | 50.5                    | -1.04   |

Large Scale ISG Screen: EboV trVLP in HEK293T cells – p1 and p2 values (Page 2 of 4)

| Gene     | P2                      |         | P1                      |         | Gene    | P2                      |         | P1                      |         |
|----------|-------------------------|---------|-------------------------|---------|---------|-------------------------|---------|-------------------------|---------|
|          | Replication (% control) | Z score | Replication (% control) | Z score |         | Replication (% control) | Z score | Replication (% control) | Z score |
| DYNLT1   | 49.5                    | -0.62   | 77.0                    | -0.49   | ISG20   | 68.1                    | -0.39   | 44.7                    | -1.16   |
| SSBP3    | 49.5                    | -0.62   | 51.2                    | -1.03   | TRAFD1  | 68.1                    | -0.39   | 126.7                   | 0.54    |
| RBM43    | 49.7                    | -0.62   | 75.9                    | -0.51   | MX1     | 68.2                    | -0.39   | 72.0                    | -0.59   |
| AKT3     | 49.8                    | -0.62   | 109.0                   | 0.18    | HLA-F   | 68.4                    | -0.39   | 125.4                   | 0.52    |
| ANGPTL1  | 50.5                    | -0.61   | 97.3                    | -0.07   | TAP1    | 68.6                    | -0.38   | 98.8                    | -0.04   |
| FAM70A   | 50.7                    | -0.61   | 75.8                    | -0.51   | LGALS3  | 69.9                    | -0.37   | 85.9                    | -0.30   |
| UPP2     | 50.7                    | -0.61   | 50.0                    | -1.05   | HLA-C   | 70.2                    | -0.36   | 123.5                   | 0.48    |
| SIRPA    | 51.0                    | -0.60   | 38.2                    | -1.29   | CASP1   | 70.4                    | -0.36   | 43.4                    | -1.19   |
| CCND3    | 52.1                    | -0.59   | 163.9                   | 1.32    | RPL22   | 70.8                    | -0.35   | 116.2                   | 0.33    |
| RNF19B   | 52.2                    | -0.59   | 82.5                    | -0.37   | APOL3   | 71.2                    | -0.35   | 75.3                    | -0.52   |
| MTHFD2L  | 52.5                    | -0.59   | 73.4                    | -0.56   | PSCD1   | 72.4                    | -0.34   | 67.5                    | -0.69   |
| EIF3EIP  | 53.2                    | -0.58   | 147.1                   | 0.97    | SCO2    | 72.6                    | -0.33   | 166.5                   | 1.37    |
| THBD     | 53.3                    | -0.57   | 201.1                   | 2.09    | TRIM38  | 73.4                    | -0.32   | 116.5                   | 0.33    |
| NT5C3    | 53.5                    | -0.57   | 84.5                    | -0.33   | IFI44   | 75.2                    | -0.30   | 79.5                    | -0.44   |
| PSMB8    | 53.6                    | -0.57   | 80.4                    | -0.42   | IFI44L  | 75.7                    | -0.29   | 30.0                    | -1.47   |
| MS4A4A   | 54.0                    | -0.57   | 52.2                    | -1.00   | AXUD1   | 75.9                    | -0.29   | 90.9                    | -0.20   |
| SECTM1   | 54.0                    | -0.57   | 45.8                    | -1.14   | MAFF    | 76.4                    | -0.28   | 102.4                   | 0.04    |
| ABLIM3   | 54.5                    | -0.56   | 53.7                    | -0.97   | ARNTL   | 76.6                    | -0.28   | 154.5                   | 1.12    |
| FAM46A   | 54.9                    | -0.55   | 52.3                    | -1.00   | TLR3    | 76.9                    | -0.28   | 106.4                   | 0.12    |
| RTP4     | 55.1                    | -0.55   | 87.1                    | -0.28   | CXCL9   | 77.0                    | -0.28   | 85.2                    | -0.32   |
| CMAH     | 55.2                    | -0.55   | 115.0                   | 0.30    | C9orf91 | 77.0                    | -0.28   | 120.6                   | 0.42    |
| MT1M     | 55.9                    | -0.54   | 148.2                   | 0.99    | IFI16   | 77.7                    | -0.27   | 94.9                    | -0.12   |
| SOCS1    | 56.6                    | -0.53   | 108.5                   | 0.17    | PSMB9   | 77.7                    | -0.27   | 126.0                   | 0.53    |
| DDX58    | 57.1                    | -0.53   | 33.2                    | -1.40   | IFITM3  | 78.3                    | -0.26   | 64.8                    | -0.74   |
| BAG1     | 57.2                    | -0.53   | 122.4                   | 0.45    | ALDH1A1 | 78.9                    | -0.25   | 69.4                    | -0.65   |
| UNC84B   | 57.3                    | -0.52   | 96.8                    | -0.08   | ERLIN1  | 79.2                    | -0.25   | 72.9                    | -0.57   |
| C19orf66 | 57.4                    | -0.52   | 96.9                    | -0.08   | CCL8    | 79.3                    | -0.25   | 51.3                    | -1.02   |
| B4GALT5  | 57.9                    | -0.52   | 104.5                   | 0.08    | INDO    | 79.8                    | -0.24   | 88.7                    | -0.25   |
| SPTLC2   | 58.1                    | -0.51   | 88.3                    | -0.25   | RNASE4  | 80.1                    | -0.24   | 161.0                   | 1.26    |
| BUB1     | 58.6                    | -0.51   | 74.2                    | -0.55   | AGPAT9  | 80.2                    | -0.24   | 69.0                    | -0.66   |
| MOV10    | 59.1                    | -0.50   | 513.4                   | 8.58    | DCP1A   | 82.3                    | -0.21   | 108.3                   | 0.16    |
| SAMD9L   | 59.4                    | -0.50   | 66.9                    | -0.70   | HERC6   | 82.5                    | -0.21   | 124.0                   | 0.49    |
| TMEM51   | 60.0                    | -0.49   | 104.9                   | 0.09    | IL17RB  | 82.9                    | -0.20   | 152.4                   | 1.08    |
| VAMP5    | 60.2                    | -0.49   | 65.5                    | -0.73   | JUNB    | 84.0                    | -0.19   | 115.9                   | 0.32    |
| BLZF1    | 60.2                    | -0.49   | 109.1                   | 0.18    | N4BP1   | 84.5                    | -0.18   | 59.3                    | -0.86   |
| PRKD2    | 60.4                    | -0.49   | 150.6                   | 1.04    | EPSTI1  | 84.6                    | -0.18   | 90.3                    | -0.21   |
| CHMP5    | 60.6                    | -0.48   | 126.8                   | 0.55    | TGFB1   | 85.1                    | -0.18   | 126.1                   | 0.53    |
| DDX3X    | 60.6                    | -0.48   | 59.7                    | -0.85   | SAA1    | 85.1                    | -0.18   | 204.6                   | 2.16    |
| TMEM49   | 60.9                    | -0.48   | 118.1                   | 0.36    | PFKFB3  | 85.6                    | -0.17   | 137.3                   | 0.76    |
| SP110    | 61.2                    | -0.48   | 131.9                   | 0.65    | C2orf31 | 85.9                    | -0.17   | 125.1                   | 0.51    |
| CCNA1    | 62.6                    | -0.46   | 128.5                   | 0.58    | PCTK3   | 86.5                    | -0.16   | 113.5                   | 0.27    |
| IRF9     | 62.9                    | -0.46   | 90.5                    | -0.21   | PARP12  | 86.7                    | -0.16   | 103.0                   | 0.05    |
| PARP10   | 63.6                    | -0.45   | 98.6                    | -0.04   | STARD5  | 87.4                    | -0.15   | 115.0                   | 0.30    |
| SLC1A1   | 63.7                    | -0.45   | 51.9                    | -1.01   | FER1L3  | 87.5                    | -0.15   | 69.5                    | -0.65   |
| ANKRD22  | 64.0                    | -0.44   | 110.6                   | 0.21    | ISG15   | 87.6                    | -0.14   | 135.4                   | 0.72    |
| C4orf32  | 64.0                    | -0.44   | 91.9                    | -0.18   | MT1L    | 87.7                    | -0.14   | 84.7                    | -0.33   |
| BCL3     | 64.0                    | -0.44   | 128.9                   | 0.59    | IFI6    | 87.9                    | -0.14   | 47.4                    | -1.10   |
| MAFF     | 64.1                    | -0.44   | 64.8                    | -0.74   | IFITM2  | 88.1                    | -0.14   | 86.1                    | -0.30   |
| C4orf33  | 64.4                    | -0.44   | 76.6                    | -0.50   | PMAIP1  | 88.5                    | -0.13   | 61.8                    | -0.81   |
| C1S      | 64.5                    | -0.43   | 50.3                    | -1.04   | NOS2A   | 89.7                    | -0.12   | 76.5                    | -0.50   |
| APOL2    | 64.6                    | -0.43   | 87.8                    | -0.26   | PLEKHA4 | 90.0                    | -0.11   | 83.1                    | -0.36   |
| TRIM21   | 65.5                    | -0.42   | 56.4                    | -0.92   | STAT3   | 90.7                    | -0.11   | 61.9                    | -0.80   |
| HESX1    | 65.9                    | -0.42   | 97.7                    | -0.06   | EIF2AK2 | 91.0                    | -0.10   | 67.4                    | -0.69   |
| SNN      | 66.7                    | -0.41   | 57.6                    | -0.89   | ELF1    | 91.5                    | -0.10   | 32.8                    | -1.41   |
| LIPA     | 66.7                    | -0.41   | 107.0                   | 0.13    | PBEF1   | 92.3                    | -0.09   | 127.7                   | 0.56    |
| LAMP3    | 67.1                    | -0.40   | 107.0                   | 0.13    | RIPK2   | 92.6                    | -0.08   | 28.7                    | -1.49   |
| CCDC109B | 67.2                    | -0.40   | 51.7                    | -1.02   | DUSP5   | 93.1                    | -0.08   | 142.8                   | 0.88    |
| OPTN     | 67.8                    | -0.39   | 77.9                    | -0.47   | CSDA    | 93.8                    | -0.07   | 164.4                   | 1.33    |
| DDIT4    | 68.0                    | -0.39   | 130.1                   | 0.61    | OGFR    | 94.1                    | -0.06   | 106.3                   | 0.12    |

| Gene     | P2                      |         | P1                      |         | Gene     | P2                      |         | P1                      |         |
|----------|-------------------------|---------|-------------------------|---------|----------|-------------------------|---------|-------------------------|---------|
|          | Replication (% control) | Z score | Replication (% control) | Z score |          | Replication (% control) | Z score | Replication (% control) | Z score |
| EXT1     | 94.2                    | -0.06   | 99.2                    | -0.03   | SLC25A30 | 128.3                   | 0.37    | 157.1                   | 1.18    |
| RBM25    | 95.1                    | -0.05   | 77.9                    | -0.47   | S100A8   | 128.4                   | 0.37    | 96.7                    | -0.08   |
| BCL2L14  | 95.1                    | -0.05   | 60.0                    | -0.84   | SP100    | 129.2                   | 0.38    | 82.8                    | -0.37   |
| PRAME    | 95.9                    | -0.04   | 177.4                   | 1.60    | CRY1     | 130.9                   | 0.40    | 115.4                   | 0.31    |
| GEM      | 95.9                    | -0.04   | 80.8                    | -0.41   | ATP10D   | 131.8                   | 0.41    | 102.7                   | 0.04    |
| BTN3A3   | 96.1                    | -0.04   | 106.2                   | 0.12    | IL1RN    | 132.0                   | 0.41    | 175.7                   | 1.56    |
| TBX3     | 96.4                    | -0.03   | 168.5                   | 1.41    | IFI30    | 132.5                   | 0.42    | 107.7                   | 0.15    |
| MICB     | 98.2                    | -0.01   | 63.5                    | -0.77   | APOBEC3G | 132.8                   | 0.42    | 68.1                    | -0.67   |
| GPX2     | 98.9                    | 0.00    | 114.8                   | 0.30    | TDRD7    | 132.9                   | 0.42    | 123.3                   | 0.47    |
| CD74     | 100.2                   | 0.01    | 130.0                   | 0.61    | PTMA     | 133.0                   | 0.42    | 99.1                    | -0.03   |
| STAT1    | 101.6                   | 0.03    | 115.6                   | 0.31    | LINCRC   | 134.5                   | 0.44    | 83.8                    | -0.35   |
| RNF24    | 102.2                   | 0.04    | 91.1                    | -0.20   | MT1F     | 134.6                   | 0.44    | 49.9                    | -1.05   |
| GZMB     | 102.2                   | 0.04    | 75.8                    | -0.51   | GCA      | 134.7                   | 0.45    | 98.5                    | -0.04   |
| CYP1B1   | 102.4                   | 0.04    | 202.7                   | 2.12    | CD163    | 136.0                   | 0.46    | 174.2                   | 1.53    |
| LEPR     | 102.4                   | 0.04    | 116.0                   | 0.32    | CPT1A    | 136.6                   | 0.47    | 161.5                   | 1.27    |
| ADAMDEC1 | 103.3                   | 0.05    | 101.6                   | 0.02    | TCF7L2   | 136.7                   | 0.47    | 138.7                   | 0.79    |
| NPAS2    | 103.6                   | 0.06    | 133.9                   | 0.69    | SLC16A1  | 137.5                   | 0.48    | 46.8                    | -1.12   |
| ADFP     | 104.0                   | 0.06    | 103.1                   | 0.05    | PMM2     | 139.5                   | 0.51    | 103.8                   | 0.07    |
| ANKFY1   | 104.0                   | 0.06    | 92.6                    | -0.17   | MAFB     | 139.6                   | 0.51    | 214.0                   | 2.36    |
| ABTB2    | 104.7                   | 0.07    | 144.1                   | 0.90    | THOC4    | 140.0                   | 0.51    | 105.6                   | 0.10    |
| CD69     | 105.2                   | 0.08    | 108.9                   | 0.17    | HES4     | 140.8                   | 0.52    | 149.2                   | 1.01    |
| ZNF295   | 106.3                   | 0.09    | 115.1                   | 0.30    | TIMP1    | 143.6                   | 0.56    | 76.6                    | -0.50   |
| AQP9     | 106.6                   | 0.09    | 51.1                    | -1.03   | IRF7     | 143.7                   | 0.56    | 186.1                   | 1.78    |
| NCOA3    | 107.0                   | 0.10    | 104.8                   | 0.09    | TAGAP    | 143.7                   | 0.56    | 153.9                   | 1.11    |
| CCDC75   | 107.9                   | 0.11    | 88.5                    | -0.25   | LGMN     | 145.4                   | 0.58    | 113.9                   | 0.28    |
| RGS1     | 108.4                   | 0.12    | 183.2                   | 1.72    | PADI2    | 146.2                   | 0.59    | 278.6                   | 3.70    |
| FKBP5    | 108.8                   | 0.12    | 78.9                    | -0.45   | BLVRA    | 146.5                   | 0.59    | 86.8                    | -0.29   |
| FLJ39739 | 108.8                   | 0.12    | 104.5                   | 0.08    | SQLE     | 146.9                   | 0.60    | 118.5                   | 0.37    |
| CXCL11   | 109.6                   | 0.13    | 85.0                    | -0.32   | NOD2     | 147.4                   | 0.61    | 169.5                   | 1.43    |
| CLEC2B   | 109.7                   | 0.13    | 142.8                   | 0.88    | GBP3     | 148.4                   | 0.62    | 145.5                   | 0.93    |
| PXK      | 110.1                   | 0.14    | 68.8                    | -0.66   | MKX      | 148.7                   | 0.62    | 69.7                    | -0.64   |
| CCL2     | 111.2                   | 0.15    | 43.0                    | -1.19   | COMMD3   | 149.6                   | 0.63    | 64.9                    | -0.74   |
| IRF2     | 111.4                   | 0.15    | 145.1                   | 0.93    | BATF2    | 150.7                   | 0.65    | 109.8                   | 0.19    |
| TLK2     | 112.3                   | 0.16    | 92.1                    | -0.17   | DHX58    | 153.6                   | 0.68    | 100.6                   | 0.00    |
| APOL1    | 112.5                   | 0.17    | 70.4                    | -0.63   | GCH1     | 154.0                   | 0.69    | 57.1                    | -0.90   |
| GAK      | 112.8                   | 0.17    | 121.8                   | 0.44    | CDKN1A   | 154.2                   | 0.69    | 153.5                   | 1.10    |
| PCTK2    | 113.3                   | 0.18    | 95.6                    | -0.10   | ENPP1    | 154.9                   | 0.70    | 106.5                   | 0.12    |
| ZNF107   | 113.5                   | 0.18    | 103.5                   | 0.06    | IL1R     | 155.1                   | 0.70    | 46.7                    | -1.12   |
| MARCK    | 114.2                   | 0.19    | 276.4                   | 3.65    | UBE2L6   | 155.3                   | 0.70    | 86.3                    | -0.29   |
| CEBPD    | 115.1                   | 0.20    | 116.2                   | 0.33    | PFKFB3   | 155.7                   | 0.71    | 275.7                   | 3.64    |
| TYMP     | 115.7                   | 0.21    | 96.6                    | -0.08   | RBCK1    | 158.7                   | 0.75    | 140.3                   | 0.83    |
| CES1     | 115.9                   | 0.21    | 130.3                   | 0.62    | HSH2D    | 158.8                   | 0.75    | 178.5                   | 1.62    |
| KIAA1618 | 116.4                   | 0.22    | 134.5                   | 0.70    | RIPK2    | 159.8                   | 0.76    | 79.2                    | -0.44   |
| TREX1    | 116.4                   | 0.22    | 99.7                    | -0.02   | NAPA     | 160.1                   | 0.76    | 75.3                    | -0.53   |
| G6PC     | 116.9                   | 0.22    | 133.4                   | 0.68    | CFB      | 161.7                   | 0.78    | 107.0                   | 0.13    |
| IMPA2    | 117.4                   | 0.23    | 97.7                    | -0.06   | CLEC4A   | 162.0                   | 0.79    | 109.9                   | 0.19    |
| DDX60    | 117.5                   | 0.23    | 78.6                    | -0.46   | IFIT5    | 162.7                   | 0.80    | 106.0                   | 0.11    |
| C22orf28 | 119.4                   | 0.25    | 98.5                    | -0.04   | FNDC3B   | 163.2                   | 0.80    | 103.6                   | 0.06    |
| ABCA9    | 120.2                   | 0.26    | 154.0                   | 1.11    | KIAA0082 | 164.0                   | 0.81    | 64.6                    | -0.75   |
| MT1H     | 120.9                   | 0.27    | 153.7                   | 1.10    | CD38     | 167.2                   | 0.85    | 77.4                    | -0.48   |
| SPSB1    | 121.0                   | 0.27    | 120.4                   | 0.41    | HK2      | 167.7                   | 0.86    | 149.8                   | 1.02    |
| SCARB2   | 121.0                   | 0.27    | 57.4                    | -0.90   | ETV6     | 168.2                   | 0.87    | 97.4                    | -0.07   |
| PPM1K    | 122.1                   | 0.29    | 63.1                    | -0.78   | LY6E     | 168.4                   | 0.87    | 66.6                    | -0.71   |
| MAP3K5   | 122.7                   | 0.29    | 5.3                     | -1.98   | TFEC     | 170.4                   | 0.89    | 98.1                    | -0.05   |
| CRP      | 124.0                   | 0.31    | 98.4                    | -0.04   | SLFN5    | 170.5                   | 0.89    | 64.6                    | -0.75   |
| IRF2     | 124.9                   | 0.32    | 59.8                    | -0.85   | LAP3     | 172.5                   | 0.92    | 110.1                   | 0.20    |
| RGL-1    | 125.8                   | 0.33    | 153.1                   | 1.09    | NRN1     | 172.7                   | 0.92    | 91.3                    | -0.19   |
| GMPR     | 126.4                   | 0.34    | 93.6                    | -0.14   | ZNF107   | 174.4                   | 0.94    | 86.4                    | -0.29   |
| CCL4     | 127.4                   | 0.35    | 72.7                    | -0.58   | PDK1     | 174.5                   | 0.94    | 94.9                    | -0.12   |



| Gene      | P2                      |         | P1                      |         | Gene     | P2                      |         | P1                      |         |
|-----------|-------------------------|---------|-------------------------|---------|----------|-------------------------|---------|-------------------------|---------|
|           | Replication (% control) | Z score | Replication (% control) | Z score |          | Replication (% control) | Z score | Replication (% control) | Z score |
| LGALS9    | 175.7                   | 0.96    | 166.6                   | 1.37    | LRG1     | 246.4                   | 1.85    | 132.9                   | 0.67    |
| IL6ST     | 176.3                   | 0.97    | 106.9                   | 0.13    | TLR7     | 248.7                   | 1.88    | 63.9                    | -0.76   |
| RASGEF1B  | 179.1                   | 1.00    | 72.8                    | -0.58   | ADAR     | 250.4                   | 1.90    | 180.5                   | 1.66    |
| RASSF4    | 183.0                   | 1.05    | 118.3                   | 0.37    | TNFSF10  | 255.5                   | 1.96    | 99.2                    | -0.03   |
| DTX3L     | 188.2                   | 1.12    | 110.6                   | 0.21    | CD80     | 262.4                   | 2.05    | 63.1                    | -0.78   |
| CCR1      | 189.7                   | 1.13    | 70.7                    | -0.62   | ARG2     | 269.5                   | 2.14    | 132.9                   | 0.67    |
| CREB3L3   | 192.2                   | 1.17    | 152.9                   | 1.09    | TRIM34   | 271.6                   | 2.16    | 103.1                   | 0.05    |
| LOC400759 | 193.2                   | 1.18    | 85.1                    | -0.32   | HPSE     | 273.0                   | 2.18    | 109.3                   | 0.18    |
| IL15      | 193.6                   | 1.18    | 55.3                    | -0.94   | ZC3HAV1  | 273.6                   | 2.19    | 70.7                    | -0.62   |
| NUP50     | 196.4                   | 1.22    | 87.3                    | -0.27   | PML      | 277.0                   | 2.23    | 267.3                   | 3.46    |
| IGFBP2    | 197.3                   | 1.23    | 141.9                   | 0.86    | PI4K2B   | 278.1                   | 2.24    | 99.9                    | -0.01   |
| GJA4      | 198.1                   | 1.24    | 104.7                   | 0.09    | MASTL    | 280.4                   | 2.27    | 161.7                   | 1.27    |
| HLA-G     | 198.5                   | 1.25    | 82.1                    | -0.38   | FLJ23556 | 291.6                   | 2.41    | 99.0                    | -0.03   |
| FUT4      | 199.1                   | 1.25    | 234.5                   | 2.78    | PAK3     | 295.7                   | 2.46    | 59.2                    | -0.86   |
| PNRC1     | 200.1                   | 1.27    | 80.6                    | -0.41   | TNFSF13B | 306.0                   | 2.59    | 90.3                    | -0.21   |
| LAMP3     | 206.0                   | 1.34    | 143.4                   | 0.89    | ULK4     | 312.9                   | 2.68    | 90.2                    | -0.21   |
| EHD4      | 206.6                   | 1.35    | 77.7                    | -0.47   | MSR1     | 317.5                   | 2.74    | 124.4                   | 0.50    |
| SIGLEC1   | 206.9                   | 1.35    | 177.7                   | 1.60    | TNFAIP6  | 323.0                   | 2.81    | 127.8                   | 0.57    |
| C6orf150  | 213.1                   | 1.43    | 142.6                   | 0.87    | MAX      | 331.3                   | 2.91    | 146.1                   | 0.95    |
| FAM134B   | 217.7                   | 1.49    | 94.5                    | -0.12   | KIAA0040 | 345.5                   | 3.09    | 121.8                   | 0.44    |
| PLSCR1    | 221.2                   | 1.53    | 63.1                    | -0.78   | OAS3     | 371.0                   | 3.41    | 148.0                   | 0.99    |
| GBP4      | 223.4                   | 1.56    | 92.3                    | -0.17   | IFIT2    | 406.4                   | 3.85    | 103.0                   | 0.05    |
| ADM       | 223.6                   | 1.56    | 124.9                   | 0.51    | AHNAK2   | 408.6                   | 3.88    | 125.6                   | 0.52    |
| VEGFC     | 224.7                   | 1.57    | 134.0                   | 0.69    | TRIM5    | 410.9                   | 3.91    | 80.4                    | -0.42   |
| ETV7      | 225.2                   | 1.58    | 80.0                    | -0.43   | OAS2     | 433.0                   | 4.19    | 104.0                   | 0.07    |
| AMPH      | 228.5                   | 1.62    | 190.9                   | 1.88    | CD9      | 491.6                   | 4.92    | 188.2                   | 1.82    |
| IL15RA    | 229.8                   | 1.64    | 135.0                   | 0.72    |          |                         |         |                         |         |

1

| Table S2 – CRISPR Guides       |                                                                          |
|--------------------------------|--------------------------------------------------------------------------|
| LacZ Guide                     | 5'- CGA TTA AGT TGG GTA ACG CC -3'                                       |
| TRIM25 CRISPR Guide            | 5'- GAG CCG GTC ACC ACT CCG TG -3'                                       |
| ZAP CRISPR Guide               | 5'- ACT TCC ATC TGC CTT ACC GG -3'                                       |
| RIG-I CRISPR Guide             | 5'- GGG TCT TCC GGA TAT AAT CC -3'                                       |
| MAVS CRISPR Guide              | 5'- ATT GCG GCA GAT ATA CTT AT -3'                                       |
| MAVS & miniMAVS CRISPR Guide 7 | 5'- TCT GGG GCT GAG CGT CTG CA -3'                                       |
| TBK1 CRISPR Guide              | 5'- AGA GCA CTT CTA ATC ATC TG -3'                                       |
| NPC1 CRISPR Guides             | 5'- GCT CAC AAA ACA GGT TCA GT -3'<br>5'- ACA GTC GTC TTG CTG TCG AG -3' |
| KHNYN CRISPR Guides            | 5'-GGG GGT GAG CGT CCT TCC GA-3'                                         |

2

3

| Table S3 – Primers used for cloning |                                                       |
|-------------------------------------|-------------------------------------------------------|
| EcoRI_Kz_TRIM25wt_Fwd               | GCGCGAATTCGCCACCATGGCAGAGCTGTGCCCCCTGG                |
| TRIM25 ΔRING_Fwd EcoRI              | GCGCGAATTCGCCACCATGCGCGCCGTCTACCAGGCGCGACCGC          |
| TRIM25 ΔSPRY_Rev XhoI               | CGCGCGCTCGAGAATTTAATGTAATACTCCAGGAGCTC                |
| TRIM25wt_Rev_XhoI                   | CGCGCGCTCGAGCTACTTGGGGGAGCAGATGG                      |
| TRIM25wt_CR_Fwd                     | GAGCCGGTGACAACACCTTGCGGCCACAA                         |
| TRIM25wt_CR_Rev                     | TTGTGGCCGCAAGGTGTTGTCACCCGGCTC                        |
| TRIM25_CR_L7A_Fwd                   | GCGCGAATTCGCCACCATGGCAGAGCTGTGCCCCGCGGCCGAGGAGCT      |
| TRIM25_CR_L17/18R_Fwd               | GCTGTCTGTCTCCATCTGCCGGCGACCCCTCAAGGAGCCGGTC           |
| TRIM25_CR_L17/18R_Rev               | GACCGGCTCCTTGAAGGGTCGCCGGCAGATGGAGCACGACAGC           |
| TRIM25_CR_Q52R_Fwd                  | CGCCATACCTGTGCCCGCATGCCGCGCCGTCTACCAGG                |
| TRIM25_CR_Q52R_Rev                  | CCTGGTAGACGGCGCGGCATCGCGGGCACAGGTATGGCG               |
| TRIM25_CR_R54A_Fwd                  | CCATACCTGTGCCCGCAGTGCAGCGCCGTCTACCAGGCGCG             |
| TRIM25_CR_R54A_Rev                  | CGCGCCTGGTAGACGGCCGCGCACTGCGGGCACAGGTATGG             |
| TRIM25_CR_K65A_Fwd                  | GGCGCGACCGCAGCTGCACGCGAACACGGTGCTGTGCAACG             |
| TRIM25_CR_K65A_Rev                  | CGTTGCACAGCACCGTGTTCGCGTGCAGCTGCGGTGCGGCC             |
| TRIM25_CR_N66A_Fwd                  | CCGCAGCTGCACAAGGCCACGGTGCTGTGCAAC                     |
| TRIM25_CR_N66A_Rev                  | GTTGCACAGCACCGTGGCCTTGTGCAGCTGCGG                     |
| TRIM25_CR_V68A_Fwd                  | AGCTGCACAAGAACACGGCGCTGTGCAACGTGGTGG                  |
| TRIM25_CR_V68A_Rev                  | CCACCACGTTGCACAGCGCCGTGTTCTTGTGCAGCT                  |
| TRIM25_CR_L69A_Fwd                  | CTGCACAAGAACACGGTGGCGTGCACAGTGGTGGAGC                 |
| TRIM25_CR_L69A_Rev                  | GCTCCACCACGTTGCACGCCACCGTGTCTTGTGCAG                  |
| TRIM25_CR_N71D_Fwd                  | AACACGGTGCTGTGCGACGTGGTGGAGCAGTTCCTG                  |
| TRIM25_CR_N71D_Rev                  | CAGGAACTGCTCCACCACGTCGCACAGCACCGTGT                   |
| TRIM25_CR_V72A_Fwd                  | ACGGTGCTGTGCAACGCGGTGGAGCAGTTCCTGCA                   |
| TRIM25_CR_V72A_Rev                  | TGCAGGAACTGCTCCACCGCGTTGCACAGCACCGT                   |
| TRIM25_CR_K117R_Fwd                 | GAGGCCGCGTGAGGACGTGCTTGGTGTGC                         |
| TRIM25_CR_K117R_Rev                 | GCACACCAAGCACGTCCTCACGGCGGCCCTC                       |
| TRIM25_CR_Y245A_Fwd                 | GTGGAGCAGCTACAACAAGAAGCCACGAAATGAAGGCTCTCT            |
| TRIM25_CR_Y245A_Rev                 | AGAGAGCCTTCAATTTCCGTGGCTTCTTGTGTAGCTGCTCCAC           |
| TRIM25_CR_Y252A_Fwd                 | ACGGAAATGAAGGCTCTCGCGGACGCCTCAGAGACCAC                |
| TRIM25_CR_Y252A_Rev                 | GTGGTCTCTGAGGCGTCCGCGAGAGCCTTCAATTTCCGT               |
| TRIM25_CR_RHK_AAA Fwd               | CGACCTGGAGGCCACCCCTGGCCGACGCCCTAACTGTCATGTACAGTCAGATC |
| TRIM25_CR_RHK_AAA Rev               | GATCTGACTGTACATGACAGTTAGGGCTGCGGCCAGGGTGGCCTCCAGGTGCG |

|                        |                                                    |
|------------------------|----------------------------------------------------|
| TRIM25_CR_ΔRBD_Fwd     | AGCCGCTCCAAACAAAAGCCGATCCATCCACTCCAGGTGGAG         |
| TRIM25_CR_ΔRBD_Rev     | GTAGTGGATCCCCTTTTTGTTGTGGCGGTGTTGTAGTCCAG          |
| TRIM25_CR_7KA_Fwd 1    | CGCAGAGGAAGCGGCATCCGCGGCACCTCCCCCTGTCCCTGCCTTA     |
| TRIM25_CR_7KA_Fwd 2    | ACACGCCCTGTGGCGGCGGTCTCCGCAGAGGAAGCGGCATCC         |
| TRIM25_CR_7KA_Rev 1    | TGCCGCTTCCTCTGCGGAGACCGCCGCCACAGGGCGTGTGGATTTGTG   |
| TRIM25_CR_7KA_Rev 2    | AGGGACAGGGGGAGGTGCCGCGGATGCCGCTTCCTCTGCGGAG        |
| MAVS Not I Fwd         | AAGCGCGGCCGCGCAGCAATGCCGTTTGCTGAAGACAAG            |
| MAVS CR Fwd            | ATTCAGAGCAAGCACTGCAGACGCTCAGCC                     |
| MAVS CR Rev            | GGCTGAGCGTCTGCAGTGCTTGCTCTGAAT                     |
| MAVS M1A NotI Fwd      | AGGCGCGGCCGCGCAGCAGCGCCGTTTGCTGAAGACAAG            |
| MAVS M142A Fwd         | AGGAGCCAAGTTACCCGCGCCTGTCCAGGAGACCCAG              |
| MAVS M142A Rev         | CTGGGTCTCCTGGACAGGCGCGGGGTAACCTTGCTCCT             |
| MAVS Rev XhoI          | TGCTCTCGAGCTAGTGCAGACGCCGCC                        |
| XhoI_TIM1_Fwd          | AGACCTCGAGATCCCATATGCATCTTCAAGTGGTCATCTTAAGC       |
| TIM1_Rev_NotI          | ATGCGCGGCCGCTCATGGGCGTAAACTCTCAAAGAGCAC            |
| EcoRI_NPC1_Fwd         | GAATTCGCCACCATGACCGCTCGCGGCCTGGCCC                 |
| NPC1_Rev_XhoI          | CGCGCTCGAGGGGGGCTCCACATCCCGGCAGGC                  |
| P4 cis vRNA BspI F     | GACCCGTTTAGAGGCCCAA                                |
| P4 cis low CpG TRAIL F | GGGTGCTGAAGAATGAGCAGTAAATTACCGTGCATAGTATCCTGATACTT |
| P4 cis low CpG TRAIL R | AAGTATCAGGATACTATGCACGGTAATTTACTGCTCATTCTCAGCACCC  |
| P4 cis vRNA XmaI R     | TCGATCCCGGGTTAATACGACTCA                           |

4

| <b>Table S4 – Primers and probes used for cDNA synthesis and RT-qPCR</b> |                                            |
|--------------------------------------------------------------------------|--------------------------------------------|
| Trailer qPCR_F                                                           | 5'- CCA AAA CAC TAT TCC ATC TGA CAG GA -3' |
| Trailer qPCR_R                                                           | 5'- TGC CGC AAT GAA TTT AAC GC -3'         |
| Trailer qPCR probe                                                       | 5'- ATG AGC CCA GAC CTT TCG TT -3'         |
| VP40 qPCR_F                                                              | 5'- AGT TGG ACT GGC GGA AGA AC -3'         |
| VP40 qPCR_R                                                              | 5'- CAG AGT CAA TCG GCT GGG TC -3'         |
| VP40 qPCR probe                                                          | 5'- AAG CCT GGT TTC CAA TTC GC -3'         |
| GAPDH Taqman Assay                                                       | Applied Biosystems (Cat# Hs99999905_m1)    |
| OligodT                                                                  | 5'- TTT TTT TTT TTT TTT T -3'              |
| L-Pol RNA qPCR F                                                         | 5'- CCT ACG AAC AAT GTC CGC -3'            |
| L-Pol RNA qPCR R                                                         | 5'- CTG CGG AAG GAC ATT TTG -3'            |
| L-Pol qPCR probe                                                         | 5'- TTG TTA GTG CAT GGC CGA AC -3'         |
| EBOV -vRNA RT                                                            | 5' CCT CTC TCC CTG CGT GAT AAT C -3'       |
| EBOV +cRNA RT                                                            | 5'- GCC TTC TGA TGA GCG TGG TC -3'         |

5

6
